# Supplementary material for: Calcium-stimulated disassembly of focal adhesions mediated by an ORP3/IQSec1 complex
Source: eLife. 2020 Apr 1;9:e54113. doi: 10.7554/eLife.54113 (PMC7159923; doi:10.7554/eLife.54113)
Supplement: Figure 3—source data 1. — Please refer to Materials and methods for details. [file elife-54113-fig3-data1.xlsx]

## Sheet: Proteins
Uniprot Accession	Protein Description	Sum PEP Score	# Peptides	# PSMs	# Unique Peptides	# AAs	MW [kDa]
Q6DN90	IQ motif and SEC7 domain-containing protein 1 OS=Homo sapiens GN=IQSEC1 PE=1 SV=1	155.647	37	928	37	963	108.247
P11142	Heat shock cognate 71 kDa protein OS=Homo sapiens GN=HSPA8 PE=1 SV=1	143.993	29	678	18	646	70.854
P02769	Serum albumin OS=Bos taurus GN=ALB PE=1 SV=4	132.191	30	422	26	607	69.248
P0DMV9	Heat shock 70 kDa protein 1B OS=Homo sapiens GN=HSPA1B PE=1 SV=1	128.187	26	556	14	641	70.009
P34932	Heat shock 70 kDa protein 4 OS=Homo sapiens GN=HSPA4 PE=1 SV=4	126.928	28	125	27	840	94.271
P04264	Keratin, type II cytoskeletal 1 OS=Homo sapiens GN=KRT1 PE=1 SV=6	108.129	23	901	19	644	65.999
P10809	60 kDa heat shock protein, mitochondrial OS=Homo sapiens GN=HSPD1 PE=1 SV=2	100.313	21	291	21	573	61.016
P35908	Keratin, type II cytoskeletal 2 epidermal OS=Homo sapiens GN=KRT2 PE=1 SV=2	99.6856	26	312	19	639	65.393
P68371	Tubulin beta-4B chain OS=Homo sapiens GN=TUBB4B PE=1 SV=1	96.2477	14	606	1	445	49.799
Q9BVA1	Tubulin beta-2B chain OS=Homo sapiens GN=TUBB2B PE=1 SV=1	95.8765	14	540	1	445	49.921
Q13885	Tubulin beta-2A chain OS=Homo sapiens GN=TUBB2A PE=1 SV=1	95.5032	14	546	1	445	49.875
P50990	T-complex protein 1 subunit theta OS=Homo sapiens GN=CCT8 PE=1 SV=4	94.1138	22	243	22	548	59.583
P11021	78 kDa glucose-regulated protein OS=Homo sapiens GN=HSPA5 PE=1 SV=2	93.4561	23	190	21	654	72.288
P05023	Sodium/potassium-transporting ATPase subunit alpha-1 OS=Homo sapiens GN=ATP1A1 PE=1 SV=1	92.1537	23	114	13	1023	112.824
P13645	Keratin, type I cytoskeletal 10 OS=Homo sapiens GN=KRT10 PE=1 SV=6	91.8967	22	447	17	584	58.792
P04350	Tubulin beta-4A chain OS=Homo sapiens GN=TUBB4A PE=1 SV=2	90.5299	13	484	2	444	49.554
P07900-2	Isoform 2 of Heat shock protein HSP 90-alpha OS=Homo sapiens GN=HSP90AA1	89.3297	19	303	8	854	98.099
P13647	Keratin, type II cytoskeletal 5 OS=Homo sapiens GN=KRT5 PE=1 SV=3	88.3037	23	251	16	590	62.34
P08238	Heat shock protein HSP 90-beta OS=Homo sapiens GN=HSP90AB1 PE=1 SV=4	86.5611	20	340	9	724	83.212
P08779	Keratin, type I cytoskeletal 16 OS=Homo sapiens GN=KRT16 PE=1 SV=4	86.4492	23	221	12	473	51.236
P07437	Tubulin beta chain OS=Homo sapiens GN=TUBB PE=1 SV=2	86.3498	14	638	3	444	49.639
P55072	Transitional endoplasmic reticulum ATPase OS=Homo sapiens GN=VCP PE=1 SV=4	82.0014	19	87	19	806	89.266
P38646	Stress-70 protein, mitochondrial OS=Homo sapiens GN=HSPA9 PE=1 SV=2	81.5061	23	110	22	679	73.635
Q5W0B1	RING finger protein 219 OS=Homo sapiens GN=RNF219 PE=1 SV=1	81.1884	20	102	20	726	81.066
P02538	Keratin, type II cytoskeletal 6A OS=Homo sapiens GN=KRT6A PE=1 SV=3	78.8618	23	218	4	564	60.008
Q5H9R7-5	Isoform 5 of Serine/threonine-protein phosphatase 6 regulatory subunit 3 OS=Homo sapiens GN=PPP6R3	78.2855	17	145	17	879	98.423
P17987	T-complex protein 1 subunit alpha OS=Homo sapiens GN=TCP1 PE=1 SV=1	78.0879	20	121	20	556	60.306
P18206	Vinculin OS=Homo sapiens GN=VCL PE=1 SV=4	77.0722	26	60	26	1134	123.722
P04259	Keratin, type II cytoskeletal 6B OS=Homo sapiens GN=KRT6B PE=1 SV=5	76.9119	23	229	4	564	60.03
Q99615	DnaJ homolog subfamily C member 7 OS=Homo sapiens GN=DNAJC7 PE=1 SV=2	76.9074	19	132	19	494	56.405
P49368	T-complex protein 1 subunit gamma OS=Homo sapiens GN=CCT3 PE=1 SV=4	75.5882	22	117	22	545	60.495
P52272	Heterogeneous nuclear ribonucleoprotein M OS=Homo sapiens GN=HNRNPM PE=1 SV=3	74.956	17	84	17	730	77.464
P14618	Pyruvate kinase PKM OS=Homo sapiens GN=PKM PE=1 SV=4	74.2865	19	203	19	531	57.9
P78371	T-complex protein 1 subunit beta OS=Homo sapiens GN=CCT2 PE=1 SV=4	73.293	14	133	14	535	57.452
P13667	Protein disulfide-isomerase A4 OS=Homo sapiens GN=PDIA4 PE=1 SV=2	72.3138	16	51	16	645	72.887
Q16531	DNA damage-binding protein 1 OS=Homo sapiens GN=DDB1 PE=1 SV=1	72.1732	20	78	20	1140	126.887
P02533	Keratin, type I cytoskeletal 14 OS=Homo sapiens GN=KRT14 PE=1 SV=4	71.0859	20	217	5	472	51.529
P50991	T-complex protein 1 subunit delta OS=Homo sapiens GN=CCT4 PE=1 SV=4	70.6317	18	146	18	539	57.888
P54652	Heat shock-related 70 kDa protein 2 OS=Homo sapiens GN=HSPA2 PE=1 SV=1	68.6235	16	368	5	639	69.978
P06576	ATP synthase subunit beta, mitochondrial OS=Homo sapiens GN=ATP5B PE=1 SV=3	67.0924	11	230	11	529	56.525
Q9Y230	RuvB-like 2 OS=Homo sapiens GN=RUVBL2 PE=1 SV=3	66.7745	16	103	16	463	51.125
P34931	Heat shock 70 kDa protein 1-like OS=Homo sapiens GN=HSPA1L PE=1 SV=2	66.6533	15	396	1	641	70.331
A5A6J1	Tubulin alpha-1A chain OS=Pan troglodytes GN=TUBA1A PE=2 SV=1	65.9459	15	315	1	451	50.104
P11586	C-1-tetrahydrofolate synthase, cytoplasmic OS=Homo sapiens GN=MTHFD1 PE=1 SV=3	65.7799	24	72	23	935	101.495
P33176	Kinesin-1 heavy chain OS=Homo sapiens GN=KIF5B PE=1 SV=1	65.1383	16	46	16	963	109.617
Q99832	T-complex protein 1 subunit eta OS=Homo sapiens GN=CCT7 PE=1 SV=2	65.0575	15	162	15	543	59.329
P46060	Ran GTPase-activating protein 1 OS=Homo sapiens GN=RANGAP1 PE=1 SV=1	64.7179	17	73	17	587	63.502
Q9BQE3	Tubulin alpha-1C chain OS=Homo sapiens GN=TUBA1C PE=1 SV=1	64.159	16	310	2	449	49.863
P30101	Protein disulfide-isomerase A3 OS=Homo sapiens GN=PDIA3 PE=1 SV=4	63.9866	16	113	16	505	56.747
Q9NZI8	Insulin-like growth factor 2 mRNA-binding protein 1 OS=Homo sapiens GN=IGF2BP1 PE=1 SV=2	62.7456	16	56	15	577	63.441
P13639	Elongation factor 2 OS=Homo sapiens GN=EEF2 PE=1 SV=4	62.2661	19	106	18	858	95.277
P55060	Exportin-2 OS=Homo sapiens GN=CSE1L PE=1 SV=3	62.2195	16	79	16	971	110.346
P35527	Keratin, type I cytoskeletal 9 OS=Homo sapiens GN=KRT9 PE=1 SV=3	62.047	17	324	16	623	62.027
P60710	Actin, cytoplasmic 1 OS=Mus musculus GN=Actb PE=1 SV=1	61.9599	10	218	3	375	41.71
P06733	Alpha-enolase OS=Homo sapiens GN=ENO1 PE=1 SV=2	61.8657	16	235	15	434	47.139
P14868	Aspartate--tRNA ligase, cytoplasmic OS=Homo sapiens GN=DARS PE=1 SV=2	61.5323	19	129	19	501	57.1
P53396	ATP-citrate synthase OS=Homo sapiens GN=ACLY PE=1 SV=3	61.1319	19	65	19	1101	120.762
Q9P2J5	Leucine--tRNA ligase, cytoplasmic OS=Homo sapiens GN=LARS PE=1 SV=2	60.7817	15	54	15	1176	134.379
P53814-6	Isoform B3 of Smoothelin OS=Homo sapiens GN=SMTN	60.7233	17	60	17	940	101.748
O43865	Adenosylhomocysteinase 2 OS=Homo sapiens GN=AHCYL1 PE=1 SV=2	60.7217	16	87	7	530	58.913
A5A6H5	ATP synthase subunit alpha, mitochondrial OS=Pan troglodytes GN=ATP5A1 PE=2 SV=1	60.4823	17	222	15	553	59.714
P08670	Vimentin OS=Homo sapiens GN=VIM PE=1 SV=4	60.3703	18	108	16	466	53.619
Q9BUF5	Tubulin beta-6 chain OS=Homo sapiens GN=TUBB6 PE=1 SV=1	60.334	9	238	4	446	49.825
P54136	Arginine--tRNA ligase, cytoplasmic OS=Homo sapiens GN=RARS PE=1 SV=2	59.9007	17	59	17	660	75.331
Q15393	Splicing factor 3B subunit 3 OS=Homo sapiens GN=SF3B3 PE=1 SV=4	59.585	16	56	16	1217	135.492
Q92598	Heat shock protein 105 kDa OS=Homo sapiens GN=HSPH1 PE=1 SV=1	59.5266	16	58	14	858	96.804
O95757	Heat shock 70 kDa protein 4L OS=Homo sapiens GN=HSPA4L PE=1 SV=3	59.4417	14	56	12	839	94.453
Q02790	Peptidyl-prolyl cis-trans isomerase FKBP4 OS=Homo sapiens GN=FKBP4 PE=1 SV=3	59.2647	13	107	13	459	51.772
P13646	Keratin, type I cytoskeletal 13 OS=Homo sapiens GN=KRT13 PE=1 SV=4	59.253	16	92	8	458	49.557
Q14697	Neutral alpha-glucosidase AB OS=Homo sapiens GN=GANAB PE=1 SV=3	58.2356	11	58	11	944	106.807
O14654	Insulin receptor substrate 4 OS=Homo sapiens GN=IRS4 PE=1 SV=1	58.1371	14	108	14	1257	133.685
P10644	cAMP-dependent protein kinase type I-alpha regulatory subunit OS=Homo sapiens GN=PRKAR1A PE=1 SV=1	57.989	15	225	13	381	42.955
P27448	MAP/microtubule affinity-regulating kinase 3 OS=Homo sapiens GN=MARK3 PE=1 SV=4	57.6274	15	54	9	753	84.436
P04406	Glyceraldehyde-3-phosphate dehydrogenase OS=Homo sapiens GN=GAPDH PE=1 SV=3	57.1584	12	133	9	335	36.03
P30153	Serine/threonine-protein phosphatase 2A 65 kDa regulatory subunit A alpha isoform OS=Homo sapiens GN=PPP2R1A PE=1 SV=4	56.7422	17	96	13	589	65.267
P11940	Polyadenylate-binding protein 1 OS=Homo sapiens GN=PABPC1 PE=1 SV=2	56.3151	18	84	12	636	70.626
Q92841	Probable ATP-dependent RNA helicase DDX17 OS=Homo sapiens GN=DDX17 PE=1 SV=2	55.7879	15	60	10	729	80.222
O43242	26S proteasome non-ATPase regulatory subunit 3 OS=Homo sapiens GN=PSMD3 PE=1 SV=2	55.1843	18	93	18	534	60.939
Q12959-2	Isoform 2 of Disks large homolog 1 OS=Homo sapiens GN=DLG1	54.6553	12	50	12	926	103.258
O15027-5	Isoform 5 of Protein transport protein Sec16A OS=Homo sapiens GN=SEC16A	54.5356	13	57	13	2201	235.607
O00410-3	Isoform 3 of Importin-5 OS=Homo sapiens GN=IPO5	53.656	12	46	12	1115	125.464
P16615	Sarcoplasmic/endoplasmic reticulum calcium ATPase 2 OS=Homo sapiens GN=ATP2A2 PE=1 SV=1	53.4225	14	56	14	1042	114.683
O15084-1	Isoform 3 of Serine/threonine-protein phosphatase 6 regulatory ankyrin repeat subunit A OS=Homo sapiens GN=ANKRD28	53.2759	16	102	12	1086	116.469
P61979-2	Isoform 2 of Heterogeneous nuclear ribonucleoprotein K OS=Mus musculus GN=Hnrnpk	52.3796	13	116	13	464	50.996
Q13263	Transcription intermediary factor 1-beta OS=Homo sapiens GN=TRIM28 PE=1 SV=5	52.2276	12	52	12	835	88.493
Q9Y265	RuvB-like 1 OS=Homo sapiens GN=RUVBL1 PE=1 SV=1	51.8526	12	80	12	456	50.196
P13637-3	Isoform 3 of Sodium/potassium-transporting ATPase subunit alpha-3 OS=Homo sapiens GN=ATP1A3	51.7594	11	66	1	1026	112.987
P13797	Plastin-3 OS=Homo sapiens GN=PLS3 PE=1 SV=4	51.0633	15	50	11	630	70.766
P22314	Ubiquitin-like modifier-activating enzyme 1 OS=Homo sapiens GN=UBA1 PE=1 SV=3	50.9738	13	59	13	1058	117.774
P09874	Poly [ADP-ribose] polymerase 1 OS=Homo sapiens GN=PARP1 PE=1 SV=4	50.6158	18	51	18	1014	113.012
P04075-2	Isoform 2 of Fructose-bisphosphate aldolase A OS=Homo sapiens GN=ALDOA	50.0365	13	101	13	418	45.232
O43707	Alpha-actinin-4 OS=Homo sapiens GN=ACTN4 PE=1 SV=2	49.9706	11	44	8	911	104.788
Q86VP6	Cullin-associated NEDD8-dissociated protein 1 OS=Homo sapiens GN=CAND1 PE=1 SV=2	49.6333	18	51	16	1230	136.289
O95831	Apoptosis-inducing factor 1, mitochondrial OS=Homo sapiens GN=AIFM1 PE=1 SV=1	49.5983	15	68	15	613	66.859
Q9UBB4	Ataxin-10 OS=Homo sapiens GN=ATXN10 PE=1 SV=1	49.5559	10	72	10	475	53.455
P12956	X-ray repair cross-complementing protein 6 OS=Homo sapiens GN=XRCC6 PE=1 SV=2	49.5381	12	49	12	609	69.799
P12277	Creatine kinase B-type OS=Homo sapiens GN=CKB PE=1 SV=1	49.2793	7	106	7	381	42.617
P40939	Trifunctional enzyme subunit alpha, mitochondrial OS=Homo sapiens GN=HADHA PE=1 SV=2	49.2619	13	48	13	763	82.947
P31948	Stress-induced-phosphoprotein 1 OS=Homo sapiens GN=STIP1 PE=1 SV=1	49.2038	18	62	18	543	62.599
P25205-2	Isoform 2 of DNA replication licensing factor MCM3 OS=Homo sapiens GN=MCM3	49.1651	16	54	16	853	95.848
P03243	E1B 55 kDa protein OS=Human adenovirus C serotype 5 PE=1 SV=1	48.9875	11	155	11	496	54.964
P26641-2	Isoform 2 of Elongation factor 1-gamma OS=Homo sapiens GN=EEF1G	48.9711	11	97	11	487	56.114
Q12906-7	Isoform 7 of Interleukin enhancer-binding factor 3 OS=Homo sapiens GN=ILF3	48.5437	12	62	10	898	95.748
Q92974	Rho guanine nucleotide exchange factor 2 OS=Homo sapiens GN=ARHGEF2 PE=1 SV=4	47.9825	16	42	16	986	111.473
P48643	T-complex protein 1 subunit epsilon OS=Homo sapiens GN=CCT5 PE=1 SV=1	47.6955	15	78	15	541	59.633
P14625	Endoplasmin OS=Homo sapiens GN=HSP90B1 PE=1 SV=1	47.5379	15	70	14	803	92.411
Q99536	Synaptic vesicle membrane protein VAT-1 homolog OS=Homo sapiens GN=VAT1 PE=1 SV=2	47.1519	8	89	8	393	41.893
P00558	Phosphoglycerate kinase 1 OS=Homo sapiens GN=PGK1 PE=1 SV=3	47.0371	14	60	13	417	44.586
P07237	Protein disulfide-isomerase OS=Homo sapiens GN=P4HB PE=1 SV=3	46.9298	15	85	15	508	57.081
Q9H6T3	RNA polymerase II-associated protein 3 OS=Homo sapiens GN=RPAP3 PE=1 SV=2	46.9217	13	32	13	665	75.672
Q9Y263	Phospholipase A-2-activating protein OS=Homo sapiens GN=PLAA PE=1 SV=2	46.8906	10	24	10	795	87.101
O00571	ATP-dependent RNA helicase DDX3X OS=Homo sapiens GN=DDX3X PE=1 SV=3	46.4863	11	44	10	662	73.198
Q92945	Far upstream element-binding protein 2 OS=Homo sapiens GN=KHSRP PE=1 SV=4	46.3757	12	68	11	711	73.07
Q13547	Histone deacetylase 1 OS=Homo sapiens GN=HDAC1 PE=1 SV=1	45.956	12	101	10	482	55.068
P46459	Vesicle-fusing ATPase OS=Homo sapiens GN=NSF PE=1 SV=3	45.6714	13	38	13	744	82.542
P54577	Tyrosine--tRNA ligase, cytoplasmic OS=Homo sapiens GN=YARS PE=1 SV=4	45.6536	16	72	16	528	59.106
Q7KZF4	Staphylococcal nuclease domain-containing protein 1 OS=Homo sapiens GN=SND1 PE=1 SV=1	45.4666	15	38	15	910	101.934
P62197	26S protease regulatory subunit 8 OS=Sus scrofa GN=PSMC5 PE=2 SV=1	45.1291	11	70	10	406	45.597
Q13423	NAD(P) transhydrogenase, mitochondrial OS=Homo sapiens GN=NNT PE=1 SV=3	45.0913	14	40	14	1086	113.823
P50395	Rab GDP dissociation inhibitor beta OS=Homo sapiens GN=GDI2 PE=1 SV=2	44.9842	11	59	7	445	50.631
P19338	Nucleolin OS=Homo sapiens GN=NCL PE=1 SV=3	44.7486	16	131	16	710	76.568
Q8N1F7	Nuclear pore complex protein Nup93 OS=Homo sapiens GN=NUP93 PE=1 SV=2	44.6587	14	51	14	819	93.43
Q9Y3I0	tRNA-splicing ligase RtcB homolog OS=Homo sapiens GN=RTCB PE=1 SV=1	44.3049	12	70	12	505	55.175
P35998	26S protease regulatory subunit 7 OS=Homo sapiens GN=PSMC2 PE=1 SV=3	44.178	13	77	13	433	48.603
P68366	Tubulin alpha-4A chain OS=Homo sapiens GN=TUBA4A PE=1 SV=1	44.1084	11	150	2	448	49.892
P47897	Glutamine--tRNA ligase OS=Homo sapiens GN=QARS PE=1 SV=1	43.8454	13	58	13	775	87.743
Q7Z4H7	HAUS augmin-like complex subunit 6 OS=Homo sapiens GN=HAUS6 PE=1 SV=2	43.7826	12	49	12	955	108.553
P29966	Myristoylated alanine-rich C-kinase substrate OS=Homo sapiens GN=MARCKS PE=1 SV=4	43.4831	8	46	8	332	31.536
Q96A65	Exocyst complex component 4 OS=Homo sapiens GN=EXOC4 PE=1 SV=1	43.4532	11	26	11	974	110.429
P31939	Bifunctional purine biosynthesis protein PURH OS=Homo sapiens GN=ATIC PE=1 SV=3	43.3375	13	46	13	592	64.575
O00232	26S proteasome non-ATPase regulatory subunit 12 OS=Homo sapiens GN=PSMD12 PE=1 SV=3	43.0005	10	44	10	456	52.871
Q9NVI7-2	Isoform 2 of ATPase family AAA domain-containing protein 3A OS=Homo sapiens GN=ATAD3A	42.9976	16	54	16	586	66.177
P78347	General transcription factor II-I OS=Homo sapiens GN=GTF2I PE=1 SV=2	42.4659	14	34	14	998	112.346
Q01518	Adenylyl cyclase-associated protein 1 OS=Homo sapiens GN=CAP1 PE=1 SV=5	42.4269	10	63	9	475	51.869
P60842	Eukaryotic initiation factor 4A-I OS=Homo sapiens GN=EIF4A1 PE=1 SV=1	42.3824	12	121	7	406	46.125
Q8NE71	ATP-binding cassette sub-family F member 1 OS=Homo sapiens GN=ABCF1 PE=1 SV=2	42.3523	9	30	9	845	95.866
P57678	Gem-associated protein 4 OS=Homo sapiens GN=GEMIN4 PE=1 SV=2	42.1286	11	51	11	1058	119.96
P13010	X-ray repair cross-complementing protein 5 OS=Homo sapiens GN=XRCC5 PE=1 SV=3	42.1064	11	51	11	732	82.652
P03070	Large T antigen OS=Simian virus 40 PE=1 SV=2	42.0936	13	89	13	708	81.53
O75170	Serine/threonine-protein phosphatase 6 regulatory subunit 2 OS=Homo sapiens GN=PPP6R2 PE=1 SV=2	41.3559	12	34	12	966	104.876
P42704	Leucine-rich PPR motif-containing protein, mitochondrial OS=Homo sapiens GN=LRPPRC PE=1 SV=3	41.2195	14	30	14	1394	157.805
Q13310-3	Isoform 3 of Polyadenylate-binding protein 4 OS=Homo sapiens GN=PABPC4	41.1095	13	42	7	660	72.345
P17844	Probable ATP-dependent RNA helicase DDX5 OS=Homo sapiens GN=DDX5 PE=1 SV=1	40.9844	14	60	9	614	69.105
A5A6P1	D-3-phosphoglycerate dehydrogenase OS=Pan troglodytes GN=PHGDH PE=2 SV=1	40.9351	10	117	10	533	56.626
Q9UHI6	Probable ATP-dependent RNA helicase DDX20 OS=Homo sapiens GN=DDX20 PE=1 SV=2	40.7551	10	54	10	824	92.183
Q7L2E3-2	Isoform 2 of Putative ATP-dependent RNA helicase DHX30 OS=Homo sapiens GN=DHX30	40.6412	12	32	12	1222	136.03
Q9UJV9	Probable ATP-dependent RNA helicase DDX41 OS=Homo sapiens GN=DDX41 PE=1 SV=2	40.3518	12	38	12	622	69.793
P04843	Dolichyl-diphosphooligosaccharide--protein glycosyltransferase subunit 1 OS=Homo sapiens GN=RPN1 PE=1 SV=1	40.3301	16	59	16	607	68.527
P02786	Transferrin receptor protein 1 OS=Homo sapiens GN=TFRC PE=1 SV=2	40.1677	12	50	12	760	84.818
A5A6M4	Eukaryotic translation initiation factor 3 subunit L OS=Pan troglodytes GN=EIF3L PE=2 SV=1	40.1485	13	53	13	564	66.654
Q969V3	Nicalin OS=Homo sapiens GN=NCLN PE=1 SV=2	40.1231	7	41	7	563	62.935
O95347	Structural maintenance of chromosomes protein 2 OS=Homo sapiens GN=SMC2 PE=1 SV=2	39.7048	13	32	13	1197	135.572
Q96HN2	Adenosylhomocysteinase 3 OS=Homo sapiens GN=AHCYL2 PE=1 SV=1	39.6036	11	53	2	611	66.678
Q15365	Poly(rC)-binding protein 1 OS=Homo sapiens GN=PCBP1 PE=1 SV=2	39.488	9	60	5	356	37.474
O60749	Sorting nexin-2 OS=Homo sapiens GN=SNX2 PE=1 SV=2	39.3363	12	32	11	519	58.435
P61011	Signal recognition particle 54 kDa protein OS=Homo sapiens GN=SRP54 PE=1 SV=1	39.1639	11	41	11	504	55.668
Q13200	26S proteasome non-ATPase regulatory subunit 2 OS=Homo sapiens GN=PSMD2 PE=1 SV=3	39.1351	11	34	11	908	100.136
Q7KZI7-16	Isoform 16 of Serine/threonine-protein kinase MARK2 OS=Homo sapiens GN=MARK2	39.0843	14	47	10	724	81.159
Q07065	Cytoskeleton-associated protein 4 OS=Homo sapiens GN=CKAP4 PE=1 SV=2	39.0499	11	33	11	602	65.983
P19013	Keratin, type II cytoskeletal 4 OS=Homo sapiens GN=KRT4 PE=1 SV=4	38.7883	16	69	12	534	57.25
Q9UQ80	Proliferation-associated protein 2G4 OS=Homo sapiens GN=PA2G4 PE=1 SV=3	38.7122	11	70	11	394	43.759
Q99460	26S proteasome non-ATPase regulatory subunit 1 OS=Homo sapiens GN=PSMD1 PE=1 SV=2	38.1752	13	35	13	953	105.769
Q8WUM4	Programmed cell death 6-interacting protein OS=Homo sapiens GN=PDCD6IP PE=1 SV=1	38.0708	16	38	16	868	95.963
O00116	Alkyldihydroxyacetonephosphate synthase, peroxisomal OS=Homo sapiens GN=AGPS PE=1 SV=1	37.9839	9	26	9	658	72.866
O15294	UDP-N-acetylglucosamine--peptide N-acetylglucosaminyltransferase 110 kDa subunit OS=Homo sapiens GN=OGT PE=1 SV=3	37.8561	10	24	10	1046	116.85
P35222	Catenin beta-1 OS=Homo sapiens GN=CTNNB1 PE=1 SV=1	37.719	9	38	7	781	85.442
O95202	LETM1 and EF-hand domain-containing protein 1, mitochondrial OS=Homo sapiens GN=LETM1 PE=1 SV=1	37.6657	12	40	12	739	83.302
P48678	Prelamin-A/C OS=Mus musculus GN=Lmna PE=1 SV=2	37.5161	11	36	11	665	74.193
O76094	Signal recognition particle subunit SRP72 OS=Homo sapiens GN=SRP72 PE=1 SV=3	37.4156	10	24	10	671	74.56
Q15046-2	Isoform Mitochondrial of Lysine--tRNA ligase OS=Homo sapiens GN=KARS	36.7222	12	28	12	625	71.451
Q9HAV4	Exportin-5 OS=Homo sapiens GN=XPO5 PE=1 SV=1	36.5813	11	25	11	1204	136.222
O60763-2	Isoform 2 of General vesicular transport factor p115 OS=Homo sapiens GN=USO1	36.5652	11	24	11	973	109.127
P40926	Malate dehydrogenase, mitochondrial OS=Homo sapiens GN=MDH2 PE=1 SV=3	36.4469	10	52	10	338	35.481
O14980	Exportin-1 OS=Homo sapiens GN=XPO1 PE=1 SV=1	36.4292	11	40	11	1071	123.306
O14936-4	Isoform 4 of Peripheral plasma membrane protein CASK OS=Homo sapiens GN=CASK	36.4056	12	33	12	898	102.1
O95793	Double-stranded RNA-binding protein Staufen homolog 1 OS=Homo sapiens GN=STAU1 PE=1 SV=2	36.385	10	50	8	577	63.143
Q10567-3	Isoform C of AP-1 complex subunit beta-1 OS=Homo sapiens GN=AP1B1	36.3705	9	36	4	939	103.498
P60028	Rab GDP dissociation inhibitor alpha OS=Pan troglodytes GN=GDI1 PE=2 SV=1	36.2996	8	58	4	447	50.55
O95218	Zinc finger Ran-binding domain-containing protein 2 OS=Homo sapiens GN=ZRANB2 PE=1 SV=2	36.2892	10	50	10	330	37.382
Q08J23	tRNA (cytosine(34)-C(5))-methyltransferase OS=Homo sapiens GN=NSUN2 PE=1 SV=2	36.2808	10	28	10	767	86.416
P08865	40S ribosomal protein SA OS=Homo sapiens GN=RPSA PE=1 SV=4	36.2625	7	67	7	295	32.833
Q9Y2K1	Zinc finger and BTB domain-containing protein 1 OS=Homo sapiens GN=ZBTB1 PE=1 SV=3	36.1942	8	30	8	713	81.963
P52732	Kinesin-like protein KIF11 OS=Homo sapiens GN=KIF11 PE=1 SV=2	35.9948	10	26	10	1056	119.085
P49588-2	Isoform 2 of Alanine--tRNA ligase, cytoplasmic OS=Homo sapiens GN=AARS	35.9055	12	30	12	992	109.249
P49736	DNA replication licensing factor MCM2 OS=Homo sapiens GN=MCM2 PE=1 SV=4	35.9047	11	26	11	904	101.832
P54886	Delta-1-pyrroline-5-carboxylate synthase OS=Homo sapiens GN=ALDH18A1 PE=1 SV=2	35.868	12	42	12	795	87.248
Q07866-9	Isoform I of Kinesin light chain 1 OS=Homo sapiens GN=KLC1	35.7599	13	28	8	639	72.353
P22102	Trifunctional purine biosynthetic protein adenosine-3 OS=Homo sapiens GN=GART PE=1 SV=1	35.7241	10	49	10	1010	107.699
P00505	Aspartate aminotransferase, mitochondrial OS=Homo sapiens GN=GOT2 PE=1 SV=3	35.6934	10	54	10	430	47.487
P49411	Elongation factor Tu, mitochondrial OS=Homo sapiens GN=TUFM PE=1 SV=2	35.6546	10	63	10	452	49.51
P07814	Bifunctional glutamate/proline--tRNA ligase OS=Homo sapiens GN=EPRS PE=1 SV=5	35.6515	11	39	11	1512	170.483
Q9UPN7	Serine/threonine-protein phosphatase 6 regulatory subunit 1 OS=Homo sapiens GN=PPP6R1 PE=1 SV=5	35.3271	11	61	11	881	96.664
Q9Y5V3-2	Isoform 2 of Melanoma-associated antigen D1 OS=Homo sapiens GN=MAGED1	35.3234	7	41	6	834	91.901
O95071	E3 ubiquitin-protein ligase UBR5 OS=Homo sapiens GN=UBR5 PE=1 SV=2	35.2574	12	30	12	2799	309.158
Q9JHS4	ATP-dependent Clp protease ATP-binding subunit clpX-like, mitochondrial OS=Mus musculus GN=Clpx PE=1 SV=2	35.1105	11	23	11	634	69.186
P48444	Coatomer subunit delta OS=Homo sapiens GN=ARCN1 PE=1 SV=1	34.9295	11	64	11	511	57.174
Q8N7H5	RNA polymerase II-associated factor 1 homolog OS=Homo sapiens GN=PAF1 PE=1 SV=2	34.9017	8	33	8	531	59.939
Q13409	Cytoplasmic dynein 1 intermediate chain 2 OS=Homo sapiens GN=DYNC1I2 PE=1 SV=3	34.8998	10	26	10	638	71.412
Q14247	Src substrate cortactin OS=Homo sapiens GN=CTTN PE=1 SV=2	34.8833	9	36	9	550	61.549
P07195	L-lactate dehydrogenase B chain OS=Homo sapiens GN=LDHB PE=1 SV=2	34.8553	10	74	1	334	36.615
P26640	Valine--tRNA ligase OS=Homo sapiens GN=VARS PE=1 SV=4	34.7952	10	20	10	1264	140.387
Q6P1J9	Parafibromin OS=Homo sapiens GN=CDC73 PE=1 SV=1	34.766	12	59	12	531	60.539
P22234-2	Isoform 2 of Multifunctional protein ADE2 OS=Homo sapiens GN=PAICS	34.7223	10	56	10	432	47.928
O14920	Inhibitor of nuclear factor kappa-B kinase subunit beta OS=Homo sapiens GN=IKBKB PE=1 SV=1	34.6681	8	38	7	756	86.509
Q9NR30	Nucleolar RNA helicase 2 OS=Homo sapiens GN=DDX21 PE=1 SV=5	34.6454	10	29	8	783	87.29
O43719	HIV Tat-specific factor 1 OS=Homo sapiens GN=HTATSF1 PE=1 SV=1	34.5071	8	28	8	755	85.801
O75150	E3 ubiquitin-protein ligase BRE1B OS=Homo sapiens GN=RNF40 PE=1 SV=4	34.268	11	23	11	1001	113.581
P35221-2	Isoform 2 of Catenin alpha-1 OS=Homo sapiens GN=CTNNA1	34.0794	11	26	11	930	102.571
Q15366-3	Isoform 3 of Poly(rC)-binding protein 2 OS=Homo sapiens GN=PCBP2	34.0348	8	60	4	362	38.197
Q9Y3F4-2	Isoform 2 of Serine-threonine kinase receptor-associated protein OS=Homo sapiens GN=STRAP	33.9564	7	60	7	363	39.753
P17980	26S protease regulatory subunit 6A OS=Homo sapiens GN=PSMC3 PE=1 SV=3	33.6857	8	44	8	439	49.172
Q96W30	Heat shock 70 kDa protein 2 OS=Paracoccidioides lutzii (strain ATCC MYA-826 / Pb01) GN=HSP70-2 PE=2 SV=2	33.6108	7	215	2	654	70.748
Q9UJZ1	Stomatin-like protein 2, mitochondrial OS=Homo sapiens GN=STOML2 PE=1 SV=1	33.3767	8	38	8	356	38.51
P05198	Eukaryotic translation initiation factor 2 subunit 1 OS=Homo sapiens GN=EIF2S1 PE=1 SV=3	33.3711	8	34	8	315	36.089
O60664	Perilipin-3 OS=Homo sapiens GN=PLIN3 PE=1 SV=3	33.1828	5	30	5	434	47.046
Q86UE4	Protein LYRIC OS=Homo sapiens GN=MTDH PE=1 SV=2	33.1828	9	20	9	582	63.799
P31040	Succinate dehydrogenase [ubiquinone] flavoprotein subunit, mitochondrial OS=Homo sapiens GN=SDHA PE=1 SV=2	33.1675	8	31	6	664	72.645
P15924	Desmoplakin OS=Homo sapiens GN=DSP PE=1 SV=3	33.1595	13	35	13	2871	331.569
P20700	Lamin-B1 OS=Homo sapiens GN=LMNB1 PE=1 SV=2	33.09	10	22	10	586	66.368
O00231-2	Isoform 2 of 26S proteasome non-ATPase regulatory subunit 11 OS=Homo sapiens GN=PSMD11	33.0871	10	52	10	423	47.505
Q99959	Plakophilin-2 OS=Homo sapiens GN=PKP2 PE=1 SV=2	33.0358	11	39	11	881	97.355
P52292	Importin subunit alpha-1 OS=Homo sapiens GN=KPNA2 PE=1 SV=1	32.9976	8	72	8	529	57.826
Q9UHD8	Septin-9 OS=Homo sapiens GN=SEPT9 PE=1 SV=2	32.7866	6	20	6	586	65.361
P08195-4	Isoform 4 of 4F2 cell-surface antigen heavy chain OS=Homo sapiens GN=SLC3A2	32.7812	9	32	9	661	71.079
P36871	Phosphoglucomutase-1 OS=Homo sapiens GN=PGM1 PE=1 SV=3	32.7488	12	42	12	562	61.411
Q5VTR2	E3 ubiquitin-protein ligase BRE1A OS=Homo sapiens GN=RNF20 PE=1 SV=2	32.7303	10	22	10	975	113.592
P00367	Glutamate dehydrogenase 1, mitochondrial OS=Homo sapiens GN=GLUD1 PE=1 SV=2	32.6708	9	52	9	558	61.359
P55084	Trifunctional enzyme subunit beta, mitochondrial OS=Homo sapiens GN=HADHB PE=1 SV=3	32.6518	11	58	11	474	51.262
Q00839	Heterogeneous nuclear ribonucleoprotein U OS=Homo sapiens GN=HNRNPU PE=1 SV=6	32.6514	9	41	9	825	90.528
P24752	Acetyl-CoA acetyltransferase, mitochondrial OS=Homo sapiens GN=ACAT1 PE=1 SV=1	32.6199	9	40	9	427	45.171
Q9H0B6	Kinesin light chain 2 OS=Homo sapiens GN=KLC2 PE=1 SV=1	32.5846	12	26	8	622	68.892
Q9BS26	Endoplasmic reticulum resident protein 44 OS=Homo sapiens GN=ERP44 PE=1 SV=1	32.4702	9	109	8	406	46.941
Q6ZWJ1	Syntaxin-binding protein 4 OS=Homo sapiens GN=STXBP4 PE=1 SV=2	32.4642	10	22	10	553	61.623
P12763	Alpha-2-HS-glycoprotein OS=Bos taurus GN=AHSG PE=1 SV=2	32.462	7	166	7	359	38.394
P28331-2	Isoform 2 of NADH-ubiquinone oxidoreductase 75 kDa subunit, mitochondrial OS=Homo sapiens GN=NDUFS1	32.3909	9	20	9	741	80.945
Q9ULX6	A-kinase anchor protein 8-like OS=Homo sapiens GN=AKAP8L PE=1 SV=3	32.3556	10	54	10	646	71.604
Q15459	Splicing factor 3A subunit 1 OS=Homo sapiens GN=SF3A1 PE=1 SV=1	32.3505	8	22	8	793	88.831
O94905	Erlin-2 OS=Homo sapiens GN=ERLIN2 PE=1 SV=1	32.289	7	39	5	339	37.815
Q92900	Regulator of nonsense transcripts 1 OS=Homo sapiens GN=UPF1 PE=1 SV=2	32.0949	12	30	12	1129	124.267
P38606	V-type proton ATPase catalytic subunit A OS=Homo sapiens GN=ATP6V1A PE=1 SV=2	32.0591	8	23	8	617	68.26
Q6NZY4	Zinc finger CCHC domain-containing protein 8 OS=Homo sapiens GN=ZCCHC8 PE=1 SV=2	32.0559	8	22	8	707	78.529
P06868	Plasminogen OS=Bos taurus GN=PLG PE=1 SV=2	32.0407	9	49	9	812	91.157
P42285	Superkiller viralicidic activity 2-like 2 OS=Homo sapiens GN=SKIV2L2 PE=1 SV=3	32.0306	10	28	10	1042	117.729
Q8N163	Cell cycle and apoptosis regulator protein 2 OS=Homo sapiens GN=CCAR2 PE=1 SV=2	31.9884	8	19	8	923	102.838
Q6P1M0	Long-chain fatty acid transport protein 4 OS=Homo sapiens GN=SLC27A4 PE=1 SV=1	31.9505	10	30	10	643	72.018
Q9Y6G9	Cytoplasmic dynein 1 light intermediate chain 1 OS=Homo sapiens GN=DYNC1LI1 PE=1 SV=3	31.9416	9	42	9	523	56.544
P63010-2	Isoform 2 of AP-2 complex subunit beta OS=Homo sapiens GN=AP2B1	31.9095	8	30	3	951	105.625
Q9Y383	Putative RNA-binding protein Luc7-like 2 OS=Homo sapiens GN=LUC7L2 PE=1 SV=2	31.8899	7	56	5	392	46.486
P53992	Protein transport protein Sec24C OS=Homo sapiens GN=SEC24C PE=1 SV=3	31.8066	10	28	10	1094	118.249
Q9UJS0-2	Isoform 2 of Calcium-binding mitochondrial carrier protein Aralar2 OS=Homo sapiens GN=SLC25A13	31.7953	10	25	7	676	74.257
Q9UQE7	Structural maintenance of chromosomes protein 3 OS=Homo sapiens GN=SMC3 PE=1 SV=2	31.7517	10	20	10	1217	141.454
P05388	60S acidic ribosomal protein P0 OS=Homo sapiens GN=RPLP0 PE=1 SV=1	31.652	8	50	8	317	34.252
P40227	T-complex protein 1 subunit zeta OS=Homo sapiens GN=CCT6A PE=1 SV=3	31.6227	10	92	10	531	57.988
Q16513	Serine/threonine-protein kinase N2 OS=Homo sapiens GN=PKN2 PE=1 SV=1	31.3775	9	20	8	984	111.964
A5A6N7	L-lactate dehydrogenase B chain OS=Pan troglodytes GN=LDHB PE=2 SV=1	31.3655	10	64	1	334	36.629
P13489	Ribonuclease inhibitor OS=Homo sapiens GN=RNH1 PE=1 SV=2	31.3565	9	69	9	461	49.941
P46087-4	Isoform 4 of Probable 28S rRNA (cytosine(4447)-C(5))-methyltransferase OS=Homo sapiens GN=NOP2	31.1618	8	18	8	845	92.803
P23381	Tryptophan--tRNA ligase, cytoplasmic OS=Homo sapiens GN=WARS PE=1 SV=2	31.1354	6	39	6	471	53.132
Q4G0J3-3	Isoform 3 of La-related protein 7 OS=Homo sapiens GN=LARP7	31.1026	8	22	8	589	67.612
Q13188-2	Isoform 2 of Serine/threonine-protein kinase 3 OS=Homo sapiens GN=STK3	31.0845	7	30	5	519	59.424
Q13425	Beta-2-syntrophin OS=Homo sapiens GN=SNTB2 PE=1 SV=1	30.9991	9	52	9	540	57.913
Q8N8A2	Serine/threonine-protein phosphatase 6 regulatory ankyrin repeat subunit B OS=Homo sapiens GN=ANKRD44 PE=1 SV=3	30.9925	11	31	8	993	107.535
P55884-2	Isoform 2 of Eukaryotic translation initiation factor 3 subunit B OS=Homo sapiens GN=EIF3B	30.9094	11	36	11	873	98.967
P55786	Puromycin-sensitive aminopeptidase OS=Homo sapiens GN=NPEPPS PE=1 SV=2	30.8291	11	28	11	919	103.211
Q9Y2S7	Polymerase delta-interacting protein 2 OS=Homo sapiens GN=POLDIP2 PE=1 SV=1	30.7832	8	69	8	368	42.007
P40222	Alpha-taxilin OS=Homo sapiens GN=TXLNA PE=1 SV=3	30.7282	8	26	8	546	61.853
P42166	Lamina-associated polypeptide 2, isoform alpha OS=Homo sapiens GN=TMPO PE=1 SV=2	30.7214	8	48	5	694	75.446
Q96TA2	ATP-dependent zinc metalloprotease YME1L1 OS=Homo sapiens GN=YME1L1 PE=1 SV=2	30.7165	7	30	7	773	86.401
P42167	Lamina-associated polypeptide 2, isoforms beta/gamma OS=Homo sapiens GN=TMPO PE=1 SV=2	30.6773	7	58	4	454	50.639
Q9UKA4	A-kinase anchor protein 11 OS=Homo sapiens GN=AKAP11 PE=1 SV=1	30.5954	10	31	10	1901	210.38
Q9Y5B9	FACT complex subunit SPT16 OS=Homo sapiens GN=SUPT16H PE=1 SV=1	30.5471	9	30	9	1047	119.838
O43164	E3 ubiquitin-protein ligase Praja-2 OS=Homo sapiens GN=PJA2 PE=1 SV=4	30.3904	6	30	5	708	78.166
B5ME19	Eukaryotic translation initiation factor 3 subunit C-like protein OS=Homo sapiens GN=EIF3CL PE=3 SV=1	30.3183	9	40	9	914	105.407
P05455	Lupus La protein OS=Homo sapiens GN=SSB PE=1 SV=2	30.2999	10	45	10	408	46.808
O75746	Calcium-binding mitochondrial carrier protein Aralar1 OS=Homo sapiens GN=SLC25A12 PE=1 SV=2	30.2532	10	25	7	678	74.715
P53618	Coatomer subunit beta OS=Homo sapiens GN=COPB1 PE=1 SV=3	30.2378	10	30	10	953	107.074
Q9Y4J8	Dystrobrevin alpha OS=Homo sapiens GN=DTNA PE=1 SV=2	30.1112	8	22	5	743	83.848
Q8WVX9	Fatty acyl-CoA reductase 1 OS=Homo sapiens GN=FAR1 PE=1 SV=1	30.0769	9	44	9	515	59.319
P51659	Peroxisomal multifunctional enzyme type 2 OS=Homo sapiens GN=HSD17B4 PE=1 SV=3	30.0719	9	36	9	736	79.636
O15355	Protein phosphatase 1G OS=Homo sapiens GN=PPM1G PE=1 SV=1	29.9892	9	22	9	546	59.235
Q9UBC2-2	Isoform 2 of Epidermal growth factor receptor substrate 15-like 1 OS=Homo sapiens GN=EPS15L1	29.9725	8	18	8	910	99.545
P56192	Methionine--tRNA ligase, cytoplasmic OS=Homo sapiens GN=MARS PE=1 SV=2	29.9638	10	26	10	900	101.052
Q16555	Dihydropyrimidinase-related protein 2 OS=Homo sapiens GN=DPYSL2 PE=1 SV=1	29.881	6	16	6	572	62.255
P06737	Glycogen phosphorylase, liver form OS=Homo sapiens GN=PYGL PE=1 SV=4	29.8592	9	20	7	847	97.087
Q9Y266	Nuclear migration protein nudC OS=Homo sapiens GN=NUDC PE=1 SV=1	29.636	8	45	8	331	38.219
Q06210	Glutamine--fructose-6-phosphate aminotransferase [isomerizing] 1 OS=Homo sapiens GN=GFPT1 PE=1 SV=3	29.6305	9	22	8	699	78.756
P22695	Cytochrome b-c1 complex subunit 2, mitochondrial OS=Homo sapiens GN=UQCRC2 PE=1 SV=3	29.6063	7	44	7	453	48.413
Q5SW79	Centrosomal protein of 170 kDa OS=Homo sapiens GN=CEP170 PE=1 SV=1	29.5604	9	26	9	1584	175.187
P25685	DnaJ homolog subfamily B member 1 OS=Homo sapiens GN=DNAJB1 PE=1 SV=4	29.3993	8	29	7	340	38.02
P07355-2	Isoform 2 of Annexin A2 OS=Homo sapiens GN=ANXA2	29.3588	9	43	9	357	40.386
Q9NVA2-2	Isoform 2 of Septin-11 OS=Homo sapiens GN=SEPT11	29.2804	7	40	3	439	50.791
P26639-2	Isoform 2 of Threonine--tRNA ligase, cytoplasmic OS=Homo sapiens GN=TARS	29.1538	9	30	9	756	86.806
Q5T8P6	RNA-binding protein 26 OS=Homo sapiens GN=RBM26 PE=1 SV=3	29.1472	9	25	9	1007	113.527
P31689	DnaJ homolog subfamily A member 1 OS=Homo sapiens GN=DNAJA1 PE=1 SV=2	29.0782	6	36	1	397	44.839
Q5TCQ9	Membrane-associated guanylate kinase, WW and PDZ domain-containing protein 3 OS=Homo sapiens GN=MAGI3 PE=1 SV=2	29.0465	9	24	9	1506	165.506
O95573	Long-chain-fatty-acid--CoA ligase 3 OS=Homo sapiens GN=ACSL3 PE=1 SV=3	28.9701	8	20	8	720	80.368
O94972	E3 ubiquitin-protein ligase TRIM37 OS=Homo sapiens GN=TRIM37 PE=1 SV=2	28.9378	8	22	8	964	107.837
P23588	Eukaryotic translation initiation factor 4B OS=Homo sapiens GN=EIF4B PE=1 SV=2	28.839	7	16	7	611	69.11
P67809	Nuclease-sensitive element-binding protein 1 OS=Homo sapiens GN=YBX1 PE=1 SV=3	28.8242	6	64	4	324	35.903
Q93009	Ubiquitin carboxyl-terminal hydrolase 7 OS=Homo sapiens GN=USP7 PE=1 SV=2	28.7774	9	24	9	1102	128.22
Q01813	ATP-dependent 6-phosphofructokinase, platelet type OS=Homo sapiens GN=PFKP PE=1 SV=2	28.7301	8	32	6	784	85.542
Q6ZRV2	Protein FAM83H OS=Homo sapiens GN=FAM83H PE=1 SV=3	28.7116	8	26	8	1179	127.044
Q8N8S7	Protein enabled homolog OS=Homo sapiens GN=ENAH PE=1 SV=2	28.5918	6	39	6	591	66.47
P55036	26S proteasome non-ATPase regulatory subunit 4 OS=Homo sapiens GN=PSMD4 PE=1 SV=1	28.5332	7	34	7	377	40.711
P27824-2	Isoform 2 of Calnexin OS=Homo sapiens GN=CANX	28.4864	9	33	9	627	71.458
P14314	Glucosidase 2 subunit beta OS=Homo sapiens GN=PRKCSH PE=1 SV=2	28.4452	7	32	7	528	59.388
Q92499	ATP-dependent RNA helicase DDX1 OS=Homo sapiens GN=DDX1 PE=1 SV=2	28.4425	10	31	10	740	82.38
Q9H078	Caseinolytic peptidase B protein homolog OS=Homo sapiens GN=CLPB PE=1 SV=1	28.4347	9	55	9	707	78.68
P23526	Adenosylhomocysteinase OS=Homo sapiens GN=AHCY PE=1 SV=4	28.3511	10	57	9	432	47.685
Q99873	Protein arginine N-methyltransferase 1 OS=Homo sapiens GN=PRMT1 PE=1 SV=2	28.3485	8	40	8	361	41.489
Q13620	Cullin-4B OS=Homo sapiens GN=CUL4B PE=1 SV=4	28.3423	10	30	8	913	103.916
P00761	Trypsin OS=Sus scrofa PE=1 SV=1	28.333	6	628	6	231	24.394
O75419-3	Isoform 3 of Cell division control protein 45 homolog OS=Homo sapiens GN=CDC45	28.2977	7	28	7	598	68.724
Q96JG8-4	Isoform 4 of Melanoma-associated antigen D4 OS=Homo sapiens GN=MAGED4	28.2725	7	18	7	757	83.165
P12814-4	Isoform 4 of Alpha-actinin-1 OS=Homo sapiens GN=ACTN1	28.2698	5	24	2	930	107.074
P61221	ATP-binding cassette sub-family E member 1 OS=Homo sapiens GN=ABCE1 PE=1 SV=1	28.1949	9	34	9	599	67.271
P19139	Casein kinase II subunit alpha OS=Rattus norvegicus GN=Csnk2a1 PE=1 SV=2	28.1746	8	41	7	391	45.045
P49959-3	Isoform 3 of Double-strand break repair protein MRE11A OS=Homo sapiens GN=MRE11A	28.1636	10	37	10	711	81.02
P10126	Elongation factor 1-alpha 1 OS=Mus musculus GN=Eef1a1 PE=1 SV=3	28.1315	10	123	10	462	50.082
P29401-2	Isoform 2 of Transketolase OS=Homo sapiens GN=TKT	28.1118	11	45	11	631	68.77
P09622	Dihydrolipoyl dehydrogenase, mitochondrial OS=Homo sapiens GN=DLD PE=1 SV=2	28.101	7	36	7	509	54.143
P28838	Cytosol aminopeptidase OS=Homo sapiens GN=LAP3 PE=1 SV=3	28.0885	9	34	9	519	56.131
Q9UBS4	DnaJ homolog subfamily B member 11 OS=Homo sapiens GN=DNAJB11 PE=1 SV=1	28.0685	7	28	7	358	40.489
Q9Y6M1	Insulin-like growth factor 2 mRNA-binding protein 2 OS=Homo sapiens GN=IGF2BP2 PE=1 SV=2	27.985	6	24	5	599	66.081
P08559-4	Isoform 4 of Pyruvate dehydrogenase E1 component subunit alpha, somatic form, mitochondrial OS=Homo sapiens GN=PDHA1	27.9837	8	50	8	428	47.549
Q9UBF2	Coatomer subunit gamma-2 OS=Homo sapiens GN=COPG2 PE=1 SV=1	27.9806	8	30	8	871	97.56
Q12797	Aspartyl/asparaginyl beta-hydroxylase OS=Homo sapiens GN=ASPH PE=1 SV=3	27.9091	7	26	7	758	85.809
O43615	Mitochondrial import inner membrane translocase subunit TIM44 OS=Homo sapiens GN=TIMM44 PE=1 SV=2	27.8	11	32	11	452	51.323
Q8NB90	Spermatogenesis-associated protein 5 OS=Homo sapiens GN=SPATA5 PE=1 SV=3	27.7739	7	24	6	893	97.843
Q9UIA9	Exportin-7 OS=Homo sapiens GN=XPO7 PE=1 SV=3	27.7452	10	20	10	1087	123.828
P63036	DnaJ homolog subfamily A member 1 OS=Rattus norvegicus GN=Dnaja1 PE=1 SV=1	27.5371	6	36	1	397	44.839
Q9UHB9	Signal recognition particle subunit SRP68 OS=Homo sapiens GN=SRP68 PE=1 SV=2	27.4687	9	22	9	627	70.686
Q8N1N4	Keratin, type II cytoskeletal 78 OS=Homo sapiens GN=KRT78 PE=2 SV=2	27.3804	10	32	8	520	56.83
Q96EB6	NAD-dependent protein deacetylase sirtuin-1 OS=Homo sapiens GN=SIRT1 PE=1 SV=2	27.376	7	16	7	747	81.63
P22059	Oxysterol-binding protein 1 OS=Homo sapiens GN=OSBP PE=1 SV=1	27.3648	6	12	6	807	89.365
Q8IXB1	DnaJ homolog subfamily C member 10 OS=Homo sapiens GN=DNAJC10 PE=1 SV=2	27.3249	8	40	8	793	91.021
P17812	CTP synthase 1 OS=Homo sapiens GN=CTPS1 PE=1 SV=2	27.3021	9	19	9	591	66.648
Q12905	Interleukin enhancer-binding factor 2 OS=Homo sapiens GN=ILF2 PE=1 SV=2	27.1874	6	26	6	390	43.035
P31943	Heterogeneous nuclear ribonucleoprotein H OS=Homo sapiens GN=HNRNPH1 PE=1 SV=4	27.1366	6	37	3	449	49.198
P19784	Casein kinase II subunit alpha' OS=Homo sapiens GN=CSNK2A2 PE=1 SV=1	27.1323	7	28	6	350	41.187
O43143	Pre-mRNA-splicing factor ATP-dependent RNA helicase DHX15 OS=Homo sapiens GN=DHX15 PE=1 SV=2	27.122	7	32	6	795	90.875
Q9Y295	Developmentally-regulated GTP-binding protein 1 OS=Homo sapiens GN=DRG1 PE=1 SV=1	27.1211	7	26	7	367	40.517
Q14498	RNA-binding protein 39 OS=Homo sapiens GN=RBM39 PE=1 SV=2	27.0657	6	24	6	530	59.343
O75874	Isocitrate dehydrogenase [NADP] cytoplasmic OS=Homo sapiens GN=IDH1 PE=1 SV=2	27.0085	6	34	6	414	46.63
P35606	Coatomer subunit beta' OS=Homo sapiens GN=COPB2 PE=1 SV=2	26.8723	8	36	8	906	102.422
O14929	Histone acetyltransferase type B catalytic subunit OS=Homo sapiens GN=HAT1 PE=1 SV=1	26.8471	5	32	5	419	49.481
Q9Y3Z3	Deoxynucleoside triphosphate triphosphohydrolase SAMHD1 OS=Homo sapiens GN=SAMHD1 PE=1 SV=2	26.8064	7	16	7	626	72.155
Q9H223	EH domain-containing protein 4 OS=Homo sapiens GN=EHD4 PE=1 SV=1	26.7446	7	16	7	541	61.137
Q7Z2W4	Zinc finger CCCH-type antiviral protein 1 OS=Homo sapiens GN=ZC3HAV1 PE=1 SV=3	26.5053	6	42	6	902	101.367
P60228	Eukaryotic translation initiation factor 3 subunit E OS=Homo sapiens GN=EIF3E PE=1 SV=1	26.4835	9	55	9	445	52.187
P41091	Eukaryotic translation initiation factor 2 subunit 3 OS=Homo sapiens GN=EIF2S3 PE=1 SV=3	26.4815	8	34	8	472	51.077
P33993	DNA replication licensing factor MCM7 OS=Homo sapiens GN=MCM7 PE=1 SV=4	26.462	10	26	10	719	81.257
P34897	Serine hydroxymethyltransferase, mitochondrial OS=Homo sapiens GN=SHMT2 PE=1 SV=3	26.4102	8	27	8	504	55.958
P27361	Mitogen-activated protein kinase 3 OS=Homo sapiens GN=MAPK3 PE=1 SV=4	26.3477	10	53	7	379	43.108
P05787-2	Isoform 2 of Keratin, type II cytoskeletal 8 OS=Homo sapiens GN=KRT8	26.2546	11	65	7	511	56.573
Q9BRK4	Leucine zipper putative tumor suppressor 2 OS=Homo sapiens GN=LZTS2 PE=1 SV=2	26.1951	6	18	6	669	72.715
Q9Y5A9	YTH domain-containing family protein 2 OS=Homo sapiens GN=YTHDF2 PE=1 SV=2	26.1378	8	30	6	579	62.296
Q13561-2	Isoform 2 of Dynactin subunit 2 OS=Homo sapiens GN=DCTN2	26.1142	8	24	8	406	44.792
Q9H3U1	Protein unc-45 homolog A OS=Homo sapiens GN=UNC45A PE=1 SV=1	26.1111	9	24	9	944	103.011
Q96AE4-2	Isoform 2 of Far upstream element-binding protein 1 OS=Homo sapiens GN=FUBP1	26.0853	9	22	7	653	68.562
P14735	Insulin-degrading enzyme OS=Homo sapiens GN=IDE PE=1 SV=4	26.0813	7	20	7	1019	117.893
Q9Y4E8	Ubiquitin carboxyl-terminal hydrolase 15 OS=Homo sapiens GN=USP15 PE=1 SV=3	26.0431	11	28	10	981	112.348
O60231	Putative pre-mRNA-splicing factor ATP-dependent RNA helicase DHX16 OS=Homo sapiens GN=DHX16 PE=1 SV=2	25.9833	7	18	6	1041	119.189
Q96QK1	Vacuolar protein sorting-associated protein 35 OS=Homo sapiens GN=VPS35 PE=1 SV=2	25.9668	9	26	9	796	91.649
O60313-2	Isoform 2 of Dynamin-like 120 kDa protein, mitochondrial OS=Homo sapiens GN=OPA1	25.8104	9	26	9	997	115.812
Q92541	RNA polymerase-associated protein RTF1 homolog OS=Homo sapiens GN=RTF1 PE=1 SV=4	25.7969	7	18	7	710	80.265
A5A6I3	Eukaryotic translation initiation factor 3 subunit F OS=Pan troglodytes GN=EIF3F PE=2 SV=1	25.7513	6	33	6	361	37.894
Q8WVM8	Sec1 family domain-containing protein 1 OS=Homo sapiens GN=SCFD1 PE=1 SV=4	25.7364	8	22	8	642	72.334
P62736	Actin, aortic smooth muscle OS=Homo sapiens GN=ACTA2 PE=1 SV=1	25.6495	7	158	1	377	41.982
O75534-4	Isoform 4 of Cold shock domain-containing protein E1 OS=Homo sapiens GN=CSDE1	25.5738	9	20	9	844	93.683
Q15008	26S proteasome non-ATPase regulatory subunit 6 OS=Homo sapiens GN=PSMD6 PE=1 SV=1	25.5354	9	29	9	389	45.502
Q15084-2	Isoform 2 of Protein disulfide-isomerase A6 OS=Homo sapiens GN=PDIA6	25.5076	6	34	6	492	53.867
Q96EY1	DnaJ homolog subfamily A member 3, mitochondrial OS=Homo sapiens GN=DNAJA3 PE=1 SV=2	25.4949	5	42	5	480	52.456
Q13043	Serine/threonine-protein kinase 4 OS=Homo sapiens GN=STK4 PE=1 SV=2	25.4945	7	24	5	487	55.595
Q16891	MICOS complex subunit MIC60 OS=Homo sapiens GN=IMMT PE=1 SV=1	25.4846	7	24	7	758	83.626
P36578	60S ribosomal protein L4 OS=Homo sapiens GN=RPL4 PE=1 SV=5	25.475	7	60	7	427	47.667
Q12931	Heat shock protein 75 kDa, mitochondrial OS=Homo sapiens GN=TRAP1 PE=1 SV=3	25.4597	8	48	7	704	80.06
P38919	Eukaryotic initiation factor 4A-III OS=Homo sapiens GN=EIF4A3 PE=1 SV=4	25.4009	9	42	9	411	46.841
Q14566	DNA replication licensing factor MCM6 OS=Homo sapiens GN=MCM6 PE=1 SV=1	25.2272	8	20	8	821	92.831
Q04695	Keratin, type I cytoskeletal 17 OS=Homo sapiens GN=KRT17 PE=1 SV=2	25.1577	9	80	2	432	48.076
P04040	Catalase OS=Homo sapiens GN=CAT PE=1 SV=3	25.0942	8	22	8	527	59.719
Q15029	116 kDa U5 small nuclear ribonucleoprotein component OS=Homo sapiens GN=EFTUD2 PE=1 SV=1	25.0879	9	29	8	972	109.366
O75821	Eukaryotic translation initiation factor 3 subunit G OS=Homo sapiens GN=EIF3G PE=1 SV=2	25.0386	5	27	5	320	35.589
P50502	Hsc70-interacting protein OS=Homo sapiens GN=ST13 PE=1 SV=2	25.0327	6	51	6	369	41.305
Q8TAF3	WD repeat-containing protein 48 OS=Homo sapiens GN=WDR48 PE=1 SV=1	25.0125	8	22	8	677	76.162
P78344	Eukaryotic translation initiation factor 4 gamma 2 OS=Homo sapiens GN=EIF4G2 PE=1 SV=1	24.9313	9	32	9	907	102.297
P41250	Glycine--tRNA ligase OS=Homo sapiens GN=GARS PE=1 SV=3	24.9232	11	24	11	739	83.113
Q02413	Desmoglein-1 OS=Homo sapiens GN=DSG1 PE=1 SV=2	24.8561	7	19	7	1049	113.676
Q8NB46	Serine/threonine-protein phosphatase 6 regulatory ankyrin repeat subunit C OS=Homo sapiens GN=ANKRD52 PE=1 SV=3	24.8417	7	39	6	1076	115.004
O95373	Importin-7 OS=Homo sapiens GN=IPO7 PE=1 SV=1	24.8012	8	16	8	1038	119.44
P05091	Aldehyde dehydrogenase, mitochondrial OS=Homo sapiens GN=ALDH2 PE=1 SV=2	24.7808	9	26	8	517	56.346
Q13451	Peptidyl-prolyl cis-trans isomerase FKBP5 OS=Homo sapiens GN=FKBP5 PE=1 SV=2	24.7789	8	42	8	457	51.18
Q9UNE7	E3 ubiquitin-protein ligase CHIP OS=Homo sapiens GN=STUB1 PE=1 SV=2	24.7224	7	21	7	303	34.834
Q14677	Clathrin interactor 1 OS=Homo sapiens GN=CLINT1 PE=1 SV=1	24.6838	6	31	6	625	68.216
P09960	Leukotriene A-4 hydrolase OS=Homo sapiens GN=LTA4H PE=1 SV=2	24.6466	7	18	7	611	69.241
P14923	Junction plakoglobin OS=Homo sapiens GN=JUP PE=1 SV=3	24.5948	7	32	5	745	81.693
P46977	Dolichyl-diphosphooligosaccharide--protein glycosyltransferase subunit STT3A OS=Homo sapiens GN=STT3A PE=1 SV=2	24.5777	7	48	7	705	80.477
P22626	Heterogeneous nuclear ribonucleoproteins A2/B1 OS=Homo sapiens GN=HNRNPA2B1 PE=1 SV=2	24.5712	7	44	7	353	37.407
Q08945	FACT complex subunit SSRP1 OS=Homo sapiens GN=SSRP1 PE=1 SV=1	24.5085	7	43	7	709	81.024
Q9UNF1	Melanoma-associated antigen D2 OS=Homo sapiens GN=MAGED2 PE=1 SV=2	24.3643	7	24	6	606	64.914
P12268	Inosine-5'-monophosphate dehydrogenase 2 OS=Homo sapiens GN=IMPDH2 PE=1 SV=2	24.3321	7	61	6	514	55.77
Q9BTE3	Mini-chromosome maintenance complex-binding protein OS=Homo sapiens GN=MCMBP PE=1 SV=2	24.3237	5	14	5	642	72.934
P35237	Serpin B6 OS=Homo sapiens GN=SERPINB6 PE=1 SV=3	24.3127	6	22	6	376	42.594
Q9UPT5	Exocyst complex component 7 OS=Homo sapiens GN=EXOC7 PE=1 SV=3	24.3096	10	22	10	735	83.33
P11177	Pyruvate dehydrogenase E1 component subunit beta, mitochondrial OS=Homo sapiens GN=PDHB PE=1 SV=3	24.2918	8	25	8	359	39.208
Q13347	Eukaryotic translation initiation factor 3 subunit I OS=Homo sapiens GN=EIF3I PE=1 SV=1	24.29	6	34	6	325	36.479
O00425	Insulin-like growth factor 2 mRNA-binding protein 3 OS=Homo sapiens GN=IGF2BP3 PE=1 SV=2	24.2775	6	18	5	579	63.666
Q9BPX3	Condensin complex subunit 3 OS=Homo sapiens GN=NCAPG PE=1 SV=1	24.2625	8	18	8	1015	114.262
P49006	MARCKS-related protein OS=Homo sapiens GN=MARCKSL1 PE=1 SV=2	24.1675	5	26	5	195	19.517
P14866	Heterogeneous nuclear ribonucleoprotein L OS=Homo sapiens GN=HNRNPL PE=1 SV=2	24.1166	7	15	7	589	64.092
Q9Y2Z0	Protein SGT1 homolog OS=Homo sapiens GN=SUGT1 PE=1 SV=3	24.1119	7	30	7	365	40.998
Q9UMR2	ATP-dependent RNA helicase DDX19B OS=Homo sapiens GN=DDX19B PE=1 SV=1	23.971	8	36	8	479	53.893
Q5JTW2-2	Isoform 2 of Centrosomal protein of 78 kDa OS=Homo sapiens GN=CEP78	23.9648	5	20	5	722	80.023
P28482	Mitogen-activated protein kinase 1 OS=Homo sapiens GN=MAPK1 PE=1 SV=3	23.9049	9	56	6	360	41.363
Q03252	Lamin-B2 OS=Homo sapiens GN=LMNB2 PE=1 SV=4	23.8813	8	19	8	620	69.906
P06744-2	Isoform 2 of Glucose-6-phosphate isomerase OS=Homo sapiens GN=GPI	23.7391	8	41	8	569	64.284
Q9P258	Protein RCC2 OS=Homo sapiens GN=RCC2 PE=1 SV=2	23.734	7	36	7	522	56.049
Q15436	Protein transport protein Sec23A OS=Homo sapiens GN=SEC23A PE=1 SV=2	23.6795	6	20	5	765	86.105
P19367-3	Isoform 3 of Hexokinase-1 OS=Homo sapiens GN=HK1	23.6313	9	18	9	921	102.672
Q9NZW5	MAGUK p55 subfamily member 6 OS=Homo sapiens GN=MPP6 PE=1 SV=2	23.5423	8	34	7	540	61.079
P02768	Serum albumin OS=Homo sapiens GN=ALB PE=1 SV=2	23.481	6	87	2	609	69.321
O94776	Metastasis-associated protein MTA2 OS=Homo sapiens GN=MTA2 PE=1 SV=1	23.4648	8	16	8	668	74.976
Q9UNZ2-5	Isoform 3 of NSFL1 cofactor p47 OS=Homo sapiens GN=NSFL1C	23.4584	7	19	7	372	40.791
O15372	Eukaryotic translation initiation factor 3 subunit H OS=Homo sapiens GN=EIF3H PE=1 SV=1	23.3741	7	27	7	352	39.905
Q15386	Ubiquitin-protein ligase E3C OS=Homo sapiens GN=UBE3C PE=1 SV=3	23.3176	9	22	9	1083	123.844
P29692-2	Isoform 2 of Elongation factor 1-delta OS=Homo sapiens GN=EEF1D	23.3085	5	24	5	647	71.364
Q9NXV6	CDKN2A-interacting protein OS=Homo sapiens GN=CDKN2AIP PE=1 SV=3	23.307	6	12	6	580	61.088
Q96I99	Succinyl-CoA ligase [GDP-forming] subunit beta, mitochondrial OS=Homo sapiens GN=SUCLG2 PE=1 SV=2	23.2993	8	23	8	432	46.481
Q02218	2-oxoglutarate dehydrogenase, mitochondrial OS=Homo sapiens GN=OGDH PE=1 SV=3	23.2904	7	18	7	1023	115.861
Q5JTV8-3	Isoform 3 of Torsin-1A-interacting protein 1 OS=Homo sapiens GN=TOR1AIP1	23.2591	7	30	1	584	66.279
Q86YT6	E3 ubiquitin-protein ligase MIB1 OS=Homo sapiens GN=MIB1 PE=1 SV=1	23.2583	7	18	7	1006	110.066
P36957	Dihydrolipoyllysine-residue succinyltransferase component of 2-oxoglutarate dehydrogenase complex, mitochondrial OS=Homo sapiens GN=DLST PE=1 SV=4	23.2191	5	30	5	453	48.724
P08243	Asparagine synthetase [glutamine-hydrolyzing] OS=Homo sapiens GN=ASNS PE=1 SV=4	23.1782	6	32	6	561	64.329
O60506	Heterogeneous nuclear ribonucleoprotein Q OS=Homo sapiens GN=SYNCRIP PE=1 SV=2	23.1409	8	32	4	623	69.56
P12081	Histidine--tRNA ligase, cytoplasmic OS=Homo sapiens GN=HARS PE=1 SV=2	23.1082	8	30	4	509	57.374
Q9Y2L1	Exosome complex exonuclease RRP44 OS=Homo sapiens GN=DIS3 PE=1 SV=2	23.0664	4	12	4	958	108.934
Q9BQ67	Glutamate-rich WD repeat-containing protein 1 OS=Homo sapiens GN=GRWD1 PE=1 SV=1	23.0443	6	32	6	446	49.388
Q9NY33	Dipeptidyl peptidase 3 OS=Homo sapiens GN=DPP3 PE=1 SV=2	23.0137	5	14	5	737	82.538
Q86UP2	Kinectin OS=Homo sapiens GN=KTN1 PE=1 SV=1	22.898	7	14	7	1357	156.179
Q7Z4Q2	HEAT repeat-containing protein 3 OS=Homo sapiens GN=HEATR3 PE=1 SV=2	22.8421	6	14	6	680	74.535
O75147	Obscurin-like protein 1 OS=Homo sapiens GN=OBSL1 PE=1 SV=4	22.8266	8	20	8	1896	206.817
P07910	Heterogeneous nuclear ribonucleoproteins C1/C2 OS=Homo sapiens GN=HNRNPC PE=1 SV=4	22.7975	8	30	8	306	33.65
O95433	Activator of 90 kDa heat shock protein ATPase homolog 1 OS=Homo sapiens GN=AHSA1 PE=1 SV=1	22.7331	8	26	8	338	38.25
P48729-2	Isoform 2 of Casein kinase I isoform alpha OS=Homo sapiens GN=CSNK1A1	22.686	4	24	1	365	41.91
Q99767	Amyloid beta A4 precursor protein-binding family A member 2 OS=Homo sapiens GN=APBA2 PE=1 SV=3	22.6285	4	18	2	749	82.46
P49915	GMP synthase [glutamine-hydrolyzing] OS=Homo sapiens GN=GMPS PE=1 SV=1	22.5894	8	22	8	693	76.667
P27694	Replication protein A 70 kDa DNA-binding subunit OS=Homo sapiens GN=RPA1 PE=1 SV=2	22.5405	8	20	8	616	68.095
O94925-3	Isoform 3 of Glutaminase kidney isoform, mitochondrial OS=Homo sapiens GN=GLS	22.3831	5	18	1	598	65.418
P53350	Serine/threonine-protein kinase PLK1 OS=Homo sapiens GN=PLK1 PE=1 SV=1	22.345	7	26	7	603	68.212
Q96D09	G-protein coupled receptor-associated sorting protein 2 OS=Homo sapiens GN=GPRASP2 PE=1 SV=1	22.33	6	26	6	838	93.715
Q16850	Lanosterol 14-alpha demethylase OS=Homo sapiens GN=CYP51A1 PE=1 SV=3	22.3158	6	26	6	503	56.769
P49591	Serine--tRNA ligase, cytoplasmic OS=Homo sapiens GN=SARS PE=1 SV=3	22.3076	6	14	6	514	58.74
Q9Y5Q8-3	Isoform 3 of General transcription factor 3C polypeptide 5 OS=Homo sapiens GN=GTF3C5	22.3069	7	30	7	526	60.331
Q7L1Q6-3	Isoform 3 of Basic leucine zipper and W2 domain-containing protein 1 OS=Homo sapiens GN=BZW1	22.2635	10	42	8	451	51.249
P31321	cAMP-dependent protein kinase type I-beta regulatory subunit OS=Homo sapiens GN=PRKAR1B PE=1 SV=4	22.2585	6	64	4	381	43.046
P08727	Keratin, type I cytoskeletal 19 OS=Homo sapiens GN=KRT19 PE=1 SV=4	22.2252	9	56	2	400	44.079
Q9NP81	Serine--tRNA ligase, mitochondrial OS=Homo sapiens GN=SARS2 PE=1 SV=1	22.2207	7	22	7	518	58.246
Q16512-2	Isoform 2 of Serine/threonine-protein kinase N1 OS=Homo sapiens GN=PKN1	22.2175	7	14	6	948	104.608
Q9H4A4	Aminopeptidase B OS=Homo sapiens GN=RNPEP PE=1 SV=2	22.193	6	14	6	650	72.549
Q13557-11	Isoform Delta 11 of Calcium/calmodulin-dependent protein kinase type II subunit delta OS=Homo sapiens GN=CAMK2D	22.0781	6	21	6	524	59.114
Q9UI10-2	Isoform 2 of Translation initiation factor eIF-2B subunit delta OS=Homo sapiens GN=EIF2B4	22.0765	6	30	6	543	59.578
Q8IW35-2	Isoform 2 of Centrosomal protein of 97 kDa OS=Homo sapiens GN=CEP97	22.0339	5	16	5	891	99.846
Q14145	Kelch-like ECH-associated protein 1 OS=Homo sapiens GN=KEAP1 PE=1 SV=2	22.029	7	28	7	624	69.621
O95817	BAG family molecular chaperone regulator 3 OS=Homo sapiens GN=BAG3 PE=1 SV=3	22.0104	5	10	5	575	61.557
P49189	4-trimethylaminobutyraldehyde dehydrogenase OS=Homo sapiens GN=ALDH9A1 PE=1 SV=3	22.0037	6	26	4	494	53.767
P51649-2	Isoform 2 of Succinate-semialdehyde dehydrogenase, mitochondrial OS=Homo sapiens GN=ALDH5A1	22.0021	5	16	5	548	58.616
P62333	26S protease regulatory subunit 10B OS=Homo sapiens GN=PSMC6 PE=1 SV=1	21.9526	6	32	6	389	44.145
Q96CX2	BTB/POZ domain-containing protein KCTD12 OS=Homo sapiens GN=KCTD12 PE=1 SV=1	21.9434	5	24	5	325	35.679
Q10713	Mitochondrial-processing peptidase subunit alpha OS=Homo sapiens GN=PMPCA PE=1 SV=2	21.8725	6	27	6	525	58.216
P51570-2	Isoform 2 of Galactokinase OS=Homo sapiens GN=GALK1	21.8626	6	26	6	422	45.329
Q9NSD9	Phenylalanine--tRNA ligase beta subunit OS=Homo sapiens GN=FARSB PE=1 SV=3	21.802	8	18	8	589	66.074
P30876	DNA-directed RNA polymerase II subunit RPB2 OS=Homo sapiens GN=POLR2B PE=1 SV=1	21.7907	7	14	7	1174	133.811
P35249	Replication factor C subunit 4 OS=Homo sapiens GN=RFC4 PE=1 SV=2	21.7166	7	26	7	363	39.657
Q9HD26	Golgi-associated PDZ and coiled-coil motif-containing protein OS=Homo sapiens GN=GOPC PE=1 SV=1	21.6339	7	27	7	462	50.489
Q92552-2	Isoform 2 of 28S ribosomal protein S27, mitochondrial OS=Homo sapiens GN=MRPS27	21.6231	6	20	6	428	49.119
P19012	Keratin, type I cytoskeletal 15 OS=Homo sapiens GN=KRT15 PE=1 SV=3	21.5886	9	72	1	456	49.181
Q6S8J3	POTE ankyrin domain family member E OS=Homo sapiens GN=POTEE PE=1 SV=3	21.5463	5	93	1	1075	121.286
O00139-4	Isoform 4 of Kinesin-like protein KIF2A OS=Homo sapiens GN=KIF2A	21.5224	8	26	7	744	84.037
Q9BT78	COP9 signalosome complex subunit 4 OS=Homo sapiens GN=COPS4 PE=1 SV=1	21.5091	5	22	5	406	46.24
Q14240-2	Isoform 2 of Eukaryotic initiation factor 4A-II OS=Homo sapiens GN=EIF4A2	21.482	6	76	1	408	46.46
P49419	Alpha-aminoadipic semialdehyde dehydrogenase OS=Homo sapiens GN=ALDH7A1 PE=1 SV=5	21.4634	7	24	7	539	58.45
O43684	Mitotic checkpoint protein BUB3 OS=Homo sapiens GN=BUB3 PE=1 SV=1	21.4589	7	33	7	328	37.131
Q14141	Septin-6 OS=Homo sapiens GN=SEPT6 PE=1 SV=4	21.4198	6	32	2	434	49.685
Q5T447	E3 ubiquitin-protein ligase HECTD3 OS=Homo sapiens GN=HECTD3 PE=1 SV=1	21.4132	6	16	6	861	97.051
P43304	Glycerol-3-phosphate dehydrogenase, mitochondrial OS=Homo sapiens GN=GPD2 PE=1 SV=3	21.3477	7	14	7	727	80.802
Q8N766	ER membrane protein complex subunit 1 OS=Homo sapiens GN=EMC1 PE=1 SV=1	21.3422	6	20	6	993	111.689
Q08209	Serine/threonine-protein phosphatase 2B catalytic subunit alpha isoform OS=Homo sapiens GN=PPP3CA PE=1 SV=1	21.315	6	28	5	521	58.65
P22694	cAMP-dependent protein kinase catalytic subunit beta OS=Homo sapiens GN=PRKACB PE=1 SV=2	21.3073	9	52	3	351	40.597
Q14318-2	Isoform 2 of Peptidyl-prolyl cis-trans isomerase FKBP8 OS=Homo sapiens GN=FKBP8	21.2564	5	26	5	413	44.621
P04844	Dolichyl-diphosphooligosaccharide--protein glycosyltransferase subunit 2 OS=Homo sapiens GN=RPN2 PE=1 SV=3	21.2546	5	46	5	631	69.241
Q9Y5K5	Ubiquitin carboxyl-terminal hydrolase isozyme L5 OS=Homo sapiens GN=UCHL5 PE=1 SV=3	21.1806	6	24	6	329	37.583
P23786	Carnitine O-palmitoyltransferase 2, mitochondrial OS=Homo sapiens GN=CPT2 PE=1 SV=2	21.1799	5	14	5	658	73.73
Q14651	Plastin-1 OS=Homo sapiens GN=PLS1 PE=1 SV=2	21.1628	7	18	3	629	70.209
Q16181	Septin-7 OS=Homo sapiens GN=SEPT7 PE=1 SV=2	21.1046	8	38	7	437	50.648
O43390-2	Isoform 2 of Heterogeneous nuclear ribonucleoprotein R OS=Homo sapiens GN=HNRNPR	21.0977	8	27	4	636	71.17
O15111	Inhibitor of nuclear factor kappa-B kinase subunit alpha OS=Homo sapiens GN=CHUK PE=1 SV=2	21.0863	8	18	7	745	84.585
Q15003	Condensin complex subunit 2 OS=Homo sapiens GN=NCAPH PE=1 SV=3	21.0304	6	14	6	741	82.511
O95429	BAG family molecular chaperone regulator 4 OS=Homo sapiens GN=BAG4 PE=1 SV=1	21.0216	5	24	5	457	49.563
O43823	A-kinase anchor protein 8 OS=Homo sapiens GN=AKAP8 PE=1 SV=1	20.9735	6	17	6	692	76.061
P07384	Calpain-1 catalytic subunit OS=Homo sapiens GN=CAPN1 PE=1 SV=1	20.9555	9	22	9	714	81.838
Q9Y2X3	Nucleolar protein 58 OS=Homo sapiens GN=NOP58 PE=1 SV=1	20.9529	5	14	5	529	59.541
Q15019-2	Isoform 2 of Septin-2 OS=Homo sapiens GN=SEPT2	20.9436	4	20	4	396	45.432
Q15042-3	Isoform 2 of Rab3 GTPase-activating protein catalytic subunit OS=Homo sapiens GN=RAB3GAP1	20.9297	6	12	6	988	111.215
P82650	28S ribosomal protein S22, mitochondrial OS=Homo sapiens GN=MRPS22 PE=1 SV=1	20.9054	7	22	7	360	41.254
O00471	Exocyst complex component 5 OS=Homo sapiens GN=EXOC5 PE=1 SV=1	20.8937	6	16	6	708	81.801
A0AVF1	Intraflagellar transport protein 56 OS=Homo sapiens GN=TTC26 PE=2 SV=1	20.8901	6	22	6	554	64.136
P51648-2	Isoform 2 of Fatty aldehyde dehydrogenase OS=Homo sapiens GN=ALDH3A2	20.8631	7	30	7	508	57.633
Q9BW92	Threonine--tRNA ligase, mitochondrial OS=Homo sapiens GN=TARS2 PE=1 SV=1	20.8487	8	16	8	718	80.985
P61160	Actin-related protein 2 OS=Homo sapiens GN=ACTR2 PE=1 SV=1	20.8382	4	26	4	394	44.732
Q01130	Serine/arginine-rich splicing factor 2 OS=Homo sapiens GN=SRSF2 PE=1 SV=4	20.8369	3	22	1	221	25.461
Q6NUK1	Calcium-binding mitochondrial carrier protein SCaMC-1 OS=Homo sapiens GN=SLC25A24 PE=1 SV=2	20.8158	8	29	8	477	53.32
Q6IN85	Serine/threonine-protein phosphatase 4 regulatory subunit 3A OS=Homo sapiens GN=PPP4R3A PE=1 SV=1	20.8003	6	14	5	833	95.308
Q9H3P7	Golgi resident protein GCP60 OS=Homo sapiens GN=ACBD3 PE=1 SV=4	20.7969	3	12	3	528	60.556
P62191	26S protease regulatory subunit 4 OS=Homo sapiens GN=PSMC1 PE=1 SV=1	20.7922	6	36	5	440	49.154
Q9UDY4	DnaJ homolog subfamily B member 4 OS=Homo sapiens GN=DNAJB4 PE=1 SV=1	20.7898	6	20	5	337	37.783
Q7Z417	Nuclear fragile X mental retardation-interacting protein 2 OS=Homo sapiens GN=NUFIP2 PE=1 SV=1	20.789	5	12	5	695	76.075
P50402	Emerin OS=Homo sapiens GN=EMD PE=1 SV=1	20.7446	6	28	6	254	28.976
Q13564-4	Isoform 4 of NEDD8-activating enzyme E1 regulatory subunit OS=Homo sapiens GN=NAE1	20.7377	5	14	5	537	60.479
P15311	Ezrin OS=Homo sapiens GN=EZR PE=1 SV=4	20.6891	8	20	6	586	69.37
Q2TAL8	Glutamine-rich protein 1 OS=Homo sapiens GN=QRICH1 PE=1 SV=1	20.6529	3	12	3	776	86.382
O43172	U4/U6 small nuclear ribonucleoprotein Prp4 OS=Homo sapiens GN=PRPF4 PE=1 SV=2	20.5585	6	24	6	522	58.412
Q96P47-4	Isoform 4 of Arf-GAP with GTPase, ANK repeat and PH domain-containing protein 3 OS=Homo sapiens GN=AGAP3	20.5095	5	22	3	911	97.891
Q70UQ0-4	Isoform 4 of Inhibitor of nuclear factor kappa-B kinase-interacting protein OS=Homo sapiens GN=IKBIP	20.503	7	24	5	377	43.057
P07954	Fumarate hydratase, mitochondrial OS=Homo sapiens GN=FH PE=1 SV=3	20.5018	4	20	4	510	54.602
Q13148	TAR DNA-binding protein 43 OS=Homo sapiens GN=TARDBP PE=1 SV=1	20.4732	5	31	5	414	44.711
P05783	Keratin, type I cytoskeletal 18 OS=Homo sapiens GN=KRT18 PE=1 SV=2	20.4628	8	44	6	430	48.029
Q9NZL4-3	Isoform 3 of Hsp70-binding protein 1 OS=Homo sapiens GN=HSPBP1	20.4309	4	14	4	405	44.487
Q5JTV8	Torsin-1A-interacting protein 1 OS=Homo sapiens GN=TOR1AIP1 PE=1 SV=2	20.4114	7	28	1	583	66.208
O43592	Exportin-T OS=Homo sapiens GN=XPOT PE=1 SV=2	20.4061	6	16	6	962	109.893
Q9UBB6-3	Isoform 3 of Neurochondrin OS=Homo sapiens GN=NCDN	20.3774	4	10	4	731	79.107
Q7L0Y3	Mitochondrial ribonuclease P protein 1 OS=Homo sapiens GN=TRMT10C PE=1 SV=2	20.3286	6	14	6	403	47.317
Q3ZCQ8-2	Isoform 2 of Mitochondrial import inner membrane translocase subunit TIM50 OS=Homo sapiens GN=TIMM50	20.3236	5	22	5	456	50.433
P40855	Peroxisomal biogenesis factor 19 OS=Homo sapiens GN=PEX19 PE=1 SV=1	20.3202	3	14	3	299	32.786
O43813	LanC-like protein 1 OS=Homo sapiens GN=LANCL1 PE=1 SV=1	20.2361	7	54	7	399	45.254
E9PAV3	Nascent polypeptide-associated complex subunit alpha, muscle-specific form OS=Homo sapiens GN=NACA PE=1 SV=1	20.2361	3	34	3	2078	205.295
P00338-3	Isoform 3 of L-lactate dehydrogenase A chain OS=Homo sapiens GN=LDHA	20.1897	8	40	7	361	39.812
Q9HC35	Echinoderm microtubule-associated protein-like 4 OS=Homo sapiens GN=EML4 PE=1 SV=3	20.1672	7	16	7	981	108.848
Q6VN20	Ran-binding protein 10 OS=Homo sapiens GN=RANBP10 PE=1 SV=1	20.1504	4	12	4	620	67.214
P04181	Ornithine aminotransferase, mitochondrial OS=Homo sapiens GN=OAT PE=1 SV=1	20.0985	5	39	5	439	48.504
Q9UHD2	Serine/threonine-protein kinase TBK1 OS=Homo sapiens GN=TBK1 PE=1 SV=1	20.0713	6	24	6	729	83.589
Q96A33	Coiled-coil domain-containing protein 47 OS=Homo sapiens GN=CCDC47 PE=1 SV=1	20.056	5	16	5	483	55.838
A5A6M2	Annexin A1 OS=Pan troglodytes GN=ANXA1 PE=2 SV=1	20.0322	6	21	6	346	38.718
P16435	NADPH--cytochrome P450 reductase OS=Homo sapiens GN=POR PE=1 SV=2	20.0001	9	18	9	677	76.641
Q5JPE7	Nodal modulator 2 OS=Homo sapiens GN=NOMO2 PE=1 SV=1	19.9666	7	14	7	1267	139.351
P62495	Eukaryotic peptide chain release factor subunit 1 OS=Homo sapiens GN=ETF1 PE=1 SV=3	19.9665	6	22	6	437	49
Q6UB35	Monofunctional C1-tetrahydrofolate synthase, mitochondrial OS=Homo sapiens GN=MTHFD1L PE=1 SV=1	19.9105	7	20	6	978	105.724
Q9Y2A7-2	Isoform 2 of Nck-associated protein 1 OS=Homo sapiens GN=NCKAP1	19.8943	7	16	7	1134	129.433
Q96PZ0	Pseudouridylate synthase 7 homolog OS=Homo sapiens GN=PUS7 PE=1 SV=2	19.8252	6	12	6	661	74.988
P52209	6-phosphogluconate dehydrogenase, decarboxylating OS=Homo sapiens GN=PGD PE=1 SV=3	19.7849	6	46	6	483	53.106
Q7L590	Protein MCM10 homolog OS=Homo sapiens GN=MCM10 PE=1 SV=2	19.771	6	14	6	875	98.121
Q9BXP5	Serrate RNA effector molecule homolog OS=Homo sapiens GN=SRRT PE=1 SV=1	19.7678	8	16	8	876	100.604
Q9BQ70	Transcription factor 25 OS=Homo sapiens GN=TCF25 PE=1 SV=1	19.7508	6	16	6	676	76.619
P50570	Dynamin-2 OS=Homo sapiens GN=DNM2 PE=1 SV=2	19.745	6	18	3	870	98.003
Q96PK6	RNA-binding protein 14 OS=Homo sapiens GN=RBM14 PE=1 SV=2	19.721	7	16	6	669	69.449
P09543	2',3'-cyclic-nucleotide 3'-phosphodiesterase OS=Homo sapiens GN=CNP PE=1 SV=2	19.6974	7	31	7	421	47.549
P12955	Xaa-Pro dipeptidase OS=Homo sapiens GN=PEPD PE=1 SV=3	19.6871	6	20	6	493	54.513
Q15233	Non-POU domain-containing octamer-binding protein OS=Homo sapiens GN=NONO PE=1 SV=4	19.6482	8	33	7	471	54.197
P61158	Actin-related protein 3 OS=Homo sapiens GN=ACTR3 PE=1 SV=3	19.6294	7	25	7	418	47.341
Q14974	Importin subunit beta-1 OS=Homo sapiens GN=KPNB1 PE=1 SV=2	19.6171	8	24	8	876	97.108
Q9BY41	Histone deacetylase 8 OS=Homo sapiens GN=HDAC8 PE=1 SV=2	19.5965	5	44	5	377	41.731
P41240	Tyrosine-protein kinase CSK OS=Homo sapiens GN=CSK PE=1 SV=1	19.5436	5	22	5	450	50.672
Q16543	Hsp90 co-chaperone Cdc37 OS=Homo sapiens GN=CDC37 PE=1 SV=1	19.4852	5	21	5	378	44.44
P49748-3	Isoform 3 of Very long-chain specific acyl-CoA dehydrogenase, mitochondrial OS=Homo sapiens GN=ACADVL	19.4583	6	14	6	678	72.881
Q06203	Amidophosphoribosyltransferase OS=Homo sapiens GN=PPAT PE=1 SV=1	19.4508	5	30	5	517	57.362
P06748	Nucleophosmin OS=Homo sapiens GN=NPM1 PE=1 SV=2	19.4394	5	33	5	294	32.555
P55735-3	Isoform 3 of Protein SEC13 homolog OS=Homo sapiens GN=SEC13	19.4218	6	37	6	368	40.721
P23258	Tubulin gamma-1 chain OS=Homo sapiens GN=TUBG1 PE=1 SV=2	19.3802	6	30	6	451	51.138
O94925	Glutaminase kidney isoform, mitochondrial OS=Homo sapiens GN=GLS PE=1 SV=1	19.3382	5	16	1	669	73.414
Q9Y617	Phosphoserine aminotransferase OS=Homo sapiens GN=PSAT1 PE=1 SV=2	19.3293	7	22	7	370	40.397
O60684	Importin subunit alpha-7 OS=Homo sapiens GN=KPNA6 PE=1 SV=1	19.3269	4	12	4	536	59.991
Q15645	Pachytene checkpoint protein 2 homolog OS=Homo sapiens GN=TRIP13 PE=1 SV=2	19.3229	6	26	6	432	48.52
Q12923-4	Isoform 4 of Tyrosine-protein phosphatase non-receptor type 13 OS=Homo sapiens GN=PTPN13	19.274	8	16	8	2490	277.335
Q6NSJ2	Pleckstrin homology-like domain family B member 3 OS=Homo sapiens GN=PHLDB3 PE=2 SV=3	19.2263	6	14	6	640	71.867
Q9H992	E3 ubiquitin-protein ligase MARCH7 OS=Homo sapiens GN=MARCH7 PE=1 SV=1	19.2213	6	18	6	704	78.003
Q99567	Nuclear pore complex protein Nup88 OS=Homo sapiens GN=NUP88 PE=1 SV=2	19.1676	4	12	4	741	83.489
Q9H0W5	Coiled-coil domain-containing protein 8 OS=Homo sapiens GN=CCDC8 PE=1 SV=2	19.1646	4	10	4	538	59.339
Q96S66	Chloride channel CLIC-like protein 1 OS=Homo sapiens GN=CLCC1 PE=1 SV=1	19.1629	5	16	5	551	61.983
O95219	Sorting nexin-4 OS=Homo sapiens GN=SNX4 PE=1 SV=1	19.1459	4	16	4	450	51.876
O94906	Pre-mRNA-processing factor 6 OS=Homo sapiens GN=PRPF6 PE=1 SV=1	19.1357	6	14	6	941	106.858
O00203	AP-3 complex subunit beta-1 OS=Homo sapiens GN=AP3B1 PE=1 SV=3	19.0423	7	13	7	1094	121.244
Q99459	Cell division cycle 5-like protein OS=Homo sapiens GN=CDC5L PE=1 SV=2	19.0245	7	16	7	802	92.194
Q9UK99	F-box only protein 3 OS=Homo sapiens GN=FBXO3 PE=1 SV=3	18.9815	6	29	6	471	54.525
P20042	Eukaryotic translation initiation factor 2 subunit 2 OS=Homo sapiens GN=EIF2S2 PE=1 SV=2	18.9737	6	18	6	333	38.364
P13861	cAMP-dependent protein kinase type II-alpha regulatory subunit OS=Homo sapiens GN=PRKAR2A PE=1 SV=2	18.9694	6	28	6	404	45.49
Q9BQ52	Zinc phosphodiesterase ELAC protein 2 OS=Homo sapiens GN=ELAC2 PE=1 SV=2	18.9448	5	14	5	826	92.16
O00154	Cytosolic acyl coenzyme A thioester hydrolase OS=Homo sapiens GN=ACOT7 PE=1 SV=3	18.9413	5	18	5	380	41.769
Q9NTJ5	Phosphatidylinositide phosphatase SAC1 OS=Homo sapiens GN=SACM1L PE=1 SV=2	18.9386	8	23	8	587	66.924
Q13033	Striatin-3 OS=Homo sapiens GN=STRN3 PE=1 SV=3	18.9228	6	12	6	797	87.155
Q2TAY7	WD40 repeat-containing protein SMU1 OS=Homo sapiens GN=SMU1 PE=1 SV=2	18.8681	6	22	6	513	57.507
P43034	Platelet-activating factor acetylhydrolase IB subunit alpha OS=Homo sapiens GN=PAFAH1B1 PE=1 SV=2	18.8432	6	38	5	410	46.608
Q96IF1	LIM domain-containing protein ajuba OS=Homo sapiens GN=AJUBA PE=1 SV=1	18.775	6	22	6	538	56.897
P04797	Glyceraldehyde-3-phosphate dehydrogenase OS=Rattus norvegicus GN=Gapdh PE=1 SV=3	18.7643	4	24	1	333	35.805
Q9UL15-2	Isoform 2 of BAG family molecular chaperone regulator 5 OS=Homo sapiens GN=BAG5	18.7392	5	22	5	488	55.992
P33992	DNA replication licensing factor MCM5 OS=Homo sapiens GN=MCM5 PE=1 SV=5	18.7361	8	20	8	734	82.233
Q8NC51	Plasminogen activator inhibitor 1 RNA-binding protein OS=Homo sapiens GN=SERBP1 PE=1 SV=2	18.7316	6	21	6	408	44.938
P04637	Cellular tumor antigen p53 OS=Homo sapiens GN=TP53 PE=1 SV=4	18.6921	7	30	7	393	43.625
Q9H845	Acyl-CoA dehydrogenase family member 9, mitochondrial OS=Homo sapiens GN=ACAD9 PE=1 SV=1	18.6751	5	18	5	621	68.717
Q9UNH7	Sorting nexin-6 OS=Homo sapiens GN=SNX6 PE=1 SV=1	18.6522	6	22	5	406	46.62
P26196	Probable ATP-dependent RNA helicase DDX6 OS=Homo sapiens GN=DDX6 PE=1 SV=2	18.6383	7	30	7	483	54.382
Q13177	Serine/threonine-protein kinase PAK 2 OS=Homo sapiens GN=PAK2 PE=1 SV=3	18.6378	6	23	5	524	58.006
Q9UGP8	Translocation protein SEC63 homolog OS=Homo sapiens GN=SEC63 PE=1 SV=2	18.6277	5	10	5	760	87.942
P08237-3	Isoform 3 of ATP-dependent 6-phosphofructokinase, muscle type OS=Homo sapiens GN=PFKM	18.6043	4	12	3	851	93.194
Q96HE7	ERO1-like protein alpha OS=Homo sapiens GN=ERO1A PE=1 SV=2	18.5533	6	21	5	468	54.358
P43246	DNA mismatch repair protein Msh2 OS=Homo sapiens GN=MSH2 PE=1 SV=1	18.5019	7	14	7	934	104.677
O75390	Citrate synthase, mitochondrial OS=Homo sapiens GN=CS PE=1 SV=2	18.4802	5	42	5	466	51.68
P52789	Hexokinase-2 OS=Homo sapiens GN=HK2 PE=1 SV=2	18.3749	6	13	6	917	102.313
Q01780	Exosome component 10 OS=Homo sapiens GN=EXOSC10 PE=1 SV=2	18.2901	7	14	7	885	100.768
P46777	60S ribosomal protein L5 OS=Homo sapiens GN=RPL5 PE=1 SV=3	18.2792	6	30	6	297	34.341
Q8WWY3	U4/U6 small nuclear ribonucleoprotein Prp31 OS=Homo sapiens GN=PRPF31 PE=1 SV=2	18.221	4	16	4	499	55.421
Q9HCC0	Methylcrotonoyl-CoA carboxylase beta chain, mitochondrial OS=Homo sapiens GN=MCCC2 PE=1 SV=1	18.1897	8	24	8	563	61.294
Q9H4M9	EH domain-containing protein 1 OS=Homo sapiens GN=EHD1 PE=1 SV=2	18.1783	6	18	6	534	60.589
P55795	Heterogeneous nuclear ribonucleoprotein H2 OS=Homo sapiens GN=HNRNPH2 PE=1 SV=1	18.1226	4	26	1	449	49.232
Q99798	Aconitate hydratase, mitochondrial OS=Homo sapiens GN=ACO2 PE=1 SV=2	18.1176	5	18	5	780	85.372
P46821	Microtubule-associated protein 1B OS=Homo sapiens GN=MAP1B PE=1 SV=2	18.1173	4	14	4	2468	270.468
Q99623	Prohibitin-2 OS=Homo sapiens GN=PHB2 PE=1 SV=2	18.1164	8	22	8	299	33.276
P87047	Heat shock 70 kDa protein 1 OS=Paracoccidioides lutzii (strain ATCC MYA-826 / Pb01) GN=HSP70-1 PE=1 SV=1	18.0992	4	47	1	649	70.461
O94927	HAUS augmin-like complex subunit 5 OS=Homo sapiens GN=HAUS5 PE=1 SV=2	18.0657	6	12	6	633	71.638
O60826	Coiled-coil domain-containing protein 22 OS=Homo sapiens GN=CCDC22 PE=1 SV=1	17.985	5	10	5	627	70.712
Q96LB3	Intraflagellar transport protein 74 homolog OS=Homo sapiens GN=IFT74 PE=1 SV=1	17.9443	5	10	5	600	69.196
P35269	General transcription factor IIF subunit 1 OS=Homo sapiens GN=GTF2F1 PE=1 SV=2	17.9376	3	10	3	517	58.205
P23921	Ribonucleoside-diphosphate reductase large subunit OS=Homo sapiens GN=RRM1 PE=1 SV=1	17.931	6	22	6	792	90.013
Q96C92	Serologically defined colon cancer antigen 3 OS=Homo sapiens GN=SDCCAG3 PE=1 SV=3	17.9231	3	20	3	435	47.932
O94826	Mitochondrial import receptor subunit TOM70 OS=Homo sapiens GN=TOMM70 PE=1 SV=1	17.9142	7	20	7	608	67.412
Q9NRZ9	Lymphoid-specific helicase OS=Homo sapiens GN=HELLS PE=1 SV=1	17.8523	5	10	5	838	97.012
P17612	cAMP-dependent protein kinase catalytic subunit alpha OS=Homo sapiens GN=PRKACA PE=1 SV=2	17.7962	8	48	2	351	40.564
Q9UI12	V-type proton ATPase subunit H OS=Homo sapiens GN=ATP6V1H PE=1 SV=1	17.7773	5	12	5	483	55.847
P40925-3	Isoform 3 of Malate dehydrogenase, cytoplasmic OS=Homo sapiens GN=MDH1	17.7433	6	22	3	352	38.603
O75694	Nuclear pore complex protein Nup155 OS=Homo sapiens GN=NUP155 PE=1 SV=1	17.7349	4	8	4	1391	155.1
P52597	Heterogeneous nuclear ribonucleoprotein F OS=Homo sapiens GN=HNRNPF PE=1 SV=3	17.7328	6	46	6	415	45.643
P46063	ATP-dependent DNA helicase Q1 OS=Homo sapiens GN=RECQL PE=1 SV=3	17.7311	5	14	5	649	73.41
Q9UJU6-3	Isoform 3 of Drebrin-like protein OS=Homo sapiens GN=DBNL	17.7173	6	22	6	439	49.012
P16989	Y-box-binding protein 3 OS=Homo sapiens GN=YBX3 PE=1 SV=4	17.7083	4	46	2	372	40.066
Q7Z434	Mitochondrial antiviral-signaling protein OS=Homo sapiens GN=MAVS PE=1 SV=2	17.705	5	17	5	540	56.493
Q9BZZ5-2	Isoform 2 of Apoptosis inhibitor 5 OS=Homo sapiens GN=API5	17.7018	5	18	5	504	56.735
Q02127	Dihydroorotate dehydrogenase (quinone), mitochondrial OS=Homo sapiens GN=DHODH PE=1 SV=3	17.6911	5	16	5	395	42.841
P12725	Alpha-1-antiproteinase OS=Ovis aries PE=1 SV=1	17.6584	7	82	7	416	45.956
P35250	Replication factor C subunit 2 OS=Homo sapiens GN=RFC2 PE=1 SV=3	17.6548	6	18	6	354	39.132
Q9HDC9	Adipocyte plasma membrane-associated protein OS=Homo sapiens GN=APMAP PE=1 SV=2	17.6007	5	32	5	416	46.451
Q9UMS4	Pre-mRNA-processing factor 19 OS=Homo sapiens GN=PRPF19 PE=1 SV=1	17.4815	7	28	7	504	55.146
Q16576	Histone-binding protein RBBP7 OS=Homo sapiens GN=RBBP7 PE=1 SV=1	17.4703	4	27	2	425	47.79
O60716	Catenin delta-1 OS=Homo sapiens GN=CTNND1 PE=1 SV=1	17.4518	5	14	5	968	108.103
P57740	Nuclear pore complex protein Nup107 OS=Homo sapiens GN=NUP107 PE=1 SV=1	17.4258	5	10	5	925	106.307
Q53H12	Acylglycerol kinase, mitochondrial OS=Homo sapiens GN=AGK PE=1 SV=2	17.3724	7	28	7	422	47.107
Q7Z794	Keratin, type II cytoskeletal 1b OS=Homo sapiens GN=KRT77 PE=2 SV=3	17.3322	7	83	4	578	61.864
O15460	Prolyl 4-hydroxylase subunit alpha-2 OS=Homo sapiens GN=P4HA2 PE=1 SV=1	17.3093	5	18	5	535	60.864
Q9UJC3	Protein Hook homolog 1 OS=Homo sapiens GN=HOOK1 PE=1 SV=2	17.3047	5	11	5	728	84.595
Q8N6T3-2	Isoform 2 of ADP-ribosylation factor GTPase-activating protein 1 OS=Homo sapiens GN=ARFGAP1	17.293	5	21	5	414	45.648
Q92696	Geranylgeranyl transferase type-2 subunit alpha OS=Homo sapiens GN=RABGGTA PE=1 SV=2	17.281	7	21	7	567	65.03
Q86XL3	Ankyrin repeat and LEM domain-containing protein 2 OS=Homo sapiens GN=ANKLE2 PE=1 SV=4	17.2791	4	10	4	938	104.05
Q9P289	Serine/threonine-protein kinase 26 OS=Homo sapiens GN=STK26 PE=1 SV=2	17.2021	5	16	3	416	46.5
Q9H857-2	Isoform 2 of 5'-nucleotidase domain-containing protein 2 OS=Homo sapiens GN=NT5DC2	17.1998	5	28	5	557	64.103
Q9NRK6	ATP-binding cassette sub-family B member 10, mitochondrial OS=Homo sapiens GN=ABCB10 PE=1 SV=2	17.1577	5	18	5	738	79.098
Q00537	Cyclin-dependent kinase 17 OS=Homo sapiens GN=CDK17 PE=1 SV=2	17.1526	7	26	4	523	59.545
Q9Y4W6	AFG3-like protein 2 OS=Homo sapiens GN=AFG3L2 PE=1 SV=2	17.1234	7	14	7	797	88.528
O94979-8	Isoform 8 of Protein transport protein Sec31A OS=Homo sapiens GN=SEC31A	17.1077	8	16	8	1233	134.415
P49643	DNA primase large subunit OS=Homo sapiens GN=PRIM2 PE=1 SV=2	17.0984	4	14	4	509	58.769
P23396-2	Isoform 2 of 40S ribosomal protein S3 OS=Homo sapiens GN=RPS3	17.0878	7	38	7	259	28.468
Q96PK6-5	Isoform 5 of RNA-binding protein 14 OS=Homo sapiens GN=RBM14	17.0741	3	10	1	339	37.011
Q04724	Transducin-like enhancer protein 1 OS=Homo sapiens GN=TLE1 PE=1 SV=2	17.0376	4	14	1	770	83.148
Q09028	Histone-binding protein RBBP4 OS=Homo sapiens GN=RBBP4 PE=1 SV=3	17.0232	5	20	3	425	47.626
O15397	Importin-8 OS=Homo sapiens GN=IPO8 PE=1 SV=2	17.0165	4	8	4	1037	119.861
P30154-2	Isoform 2 of Serine/threonine-protein phosphatase 2A 65 kDa regulatory subunit A beta isoform OS=Homo sapiens GN=PPP2R1B	16.9982	6	23	2	667	73.538
Q9BUJ2	Heterogeneous nuclear ribonucleoprotein U-like protein 1 OS=Homo sapiens GN=HNRNPUL1 PE=1 SV=2	16.9831	6	18	6	856	95.679
Q9BW19	Kinesin-like protein KIFC1 OS=Homo sapiens GN=KIFC1 PE=1 SV=2	16.9642	4	8	4	673	73.702
Q9HD20	Manganese-transporting ATPase 13A1 OS=Homo sapiens GN=ATP13A1 PE=1 SV=2	16.9615	6	12	6	1204	132.87
P08621	U1 small nuclear ribonucleoprotein 70 kDa OS=Homo sapiens GN=SNRNP70 PE=1 SV=2	16.9243	6	22	6	437	51.526
P27816	Microtubule-associated protein 4 OS=Homo sapiens GN=MAP4 PE=1 SV=3	16.9204	6	22	6	1152	120.93
P54725	UV excision repair protein RAD23 homolog A OS=Homo sapiens GN=RAD23A PE=1 SV=1	16.9195	5	20	3	363	39.585
P37837	Transaldolase OS=Homo sapiens GN=TALDO1 PE=1 SV=2	16.9073	7	31	7	337	37.516
Q9BQ04	RNA-binding protein 4B OS=Homo sapiens GN=RBM4B PE=1 SV=1	16.9031	7	22	6	359	40.124
O75083	WD repeat-containing protein 1 OS=Homo sapiens GN=WDR1 PE=1 SV=4	16.8475	6	24	6	606	66.152
O15371	Eukaryotic translation initiation factor 3 subunit D OS=Homo sapiens GN=EIF3D PE=1 SV=1	16.8459	5	10	5	548	63.932
Q5JTZ9	Alanine--tRNA ligase, mitochondrial OS=Homo sapiens GN=AARS2 PE=1 SV=1	16.7828	5	10	5	985	107.273
P28340	DNA polymerase delta catalytic subunit OS=Homo sapiens GN=POLD1 PE=1 SV=2	16.7739	5	10	5	1107	123.553
Q5VV42	Threonylcarbamoyladenosine tRNA methylthiotransferase OS=Homo sapiens GN=CDKAL1 PE=1 SV=1	16.7714	6	12	6	579	65.07
O75190-3	Isoform C of DnaJ homolog subfamily B member 6 OS=Homo sapiens GN=DNAJB6	16.761	5	18	4	325	35.692
Q9WV25	Poly(U)-binding-splicing factor PUF60 OS=Rattus norvegicus GN=Puf60 PE=2 SV=2	16.7478	6	25	6	564	60.211
Q13098-7	Isoform 2 of COP9 signalosome complex subunit 1 OS=Homo sapiens GN=GPS1	16.7227	6	30	6	527	59.013
Q9UBE0	SUMO-activating enzyme subunit 1 OS=Homo sapiens GN=SAE1 PE=1 SV=1	16.6856	6	16	6	346	38.426
Q9H6D7	HAUS augmin-like complex subunit 4 OS=Homo sapiens GN=HAUS4 PE=1 SV=1	16.6549	6	18	6	363	42.373
Q16222	UDP-N-acetylhexosamine pyrophosphorylase OS=Homo sapiens GN=UAP1 PE=1 SV=3	16.6225	4	19	4	522	58.732
P98084	Amyloid beta A4 precursor protein-binding family A member 2 OS=Mus musculus GN=Apba2 PE=1 SV=2	16.6092	3	14	1	750	82.706
O00743-3	Isoform 3 of Serine/threonine-protein phosphatase 6 catalytic subunit OS=Homo sapiens GN=PPP6C	16.6078	4	20	4	342	38.921
P51617	Interleukin-1 receptor-associated kinase 1 OS=Homo sapiens GN=IRAK1 PE=1 SV=2	16.5574	5	12	5	712	76.489
P08240	Signal recognition particle receptor subunit alpha OS=Homo sapiens GN=SRPRA PE=1 SV=2	16.5289	5	14	5	638	69.767
P49257	Protein ERGIC-53 OS=Homo sapiens GN=LMAN1 PE=1 SV=2	16.4735	5	22	5	510	57.513
P49841-2	Isoform 2 of Glycogen synthase kinase-3 beta OS=Homo sapiens GN=GSK3B	16.4391	6	14	3	433	48.004
Q9Y678	Coatomer subunit gamma-1 OS=Homo sapiens GN=COPG1 PE=1 SV=1	16.4018	5	16	5	874	97.655
P23246	Splicing factor, proline- and glutamine-rich OS=Homo sapiens GN=SFPQ PE=1 SV=2	16.391	5	14	4	707	76.102
P10155	60 kDa SS-A/Ro ribonucleoprotein OS=Homo sapiens GN=TROVE2 PE=1 SV=2	16.3879	6	22	6	538	60.631
O95861-2	Isoform 2 of 3'(2'),5'-bisphosphate nucleotidase 1 OS=Homo sapiens GN=BPNT1	16.3698	5	18	5	325	35.721
P40938	Replication factor C subunit 3 OS=Homo sapiens GN=RFC3 PE=1 SV=2	16.3479	5	24	5	356	40.53
P13674-2	Isoform 2 of Prolyl 4-hydroxylase subunit alpha-1 OS=Homo sapiens GN=P4HA1	16.3281	6	20	6	534	60.929
Q96SB4-3	Isoform 1 of SRSF protein kinase 1 OS=Homo sapiens GN=SRPK1	16.2998	3	12	3	826	92.354
Q86Y82	Syntaxin-12 OS=Homo sapiens GN=STX12 PE=1 SV=1	16.2892	7	15	7	276	31.622
Q6PI48	Aspartate--tRNA ligase, mitochondrial OS=Homo sapiens GN=DARS2 PE=1 SV=1	16.278	7	15	7	645	73.516
O60488	Long-chain-fatty-acid--CoA ligase 4 OS=Homo sapiens GN=ACSL4 PE=1 SV=2	16.199	6	12	6	711	79.137
Q96CW5	Gamma-tubulin complex component 3 OS=Homo sapiens GN=TUBGCP3 PE=1 SV=2	16.192	4	10	4	907	103.506
Q9P2R7	Succinyl-CoA ligase [ADP-forming] subunit beta, mitochondrial OS=Homo sapiens GN=SUCLA2 PE=1 SV=3	16.1897	6	22	6	463	50.285
A2T6Y4	DNA-(apurinic or apyrimidinic site) lyase OS=Pan troglodytes GN=APEX1 PE=3 SV=1	16.1829	5	16	5	318	35.546
O75477	Erlin-1 OS=Homo sapiens GN=ERLIN1 PE=1 SV=1	16.15	5	20	3	346	38.901
Q7Z739	YTH domain-containing family protein 3 OS=Homo sapiens GN=YTHDF3 PE=1 SV=1	16.1305	5	16	3	585	63.822
P21281	V-type proton ATPase subunit B, brain isoform OS=Homo sapiens GN=ATP6V1B2 PE=1 SV=3	16.1195	5	14	5	511	56.465
Q06124	Tyrosine-protein phosphatase non-receptor type 11 OS=Homo sapiens GN=PTPN11 PE=1 SV=2	16.1024	4	10	4	597	68.393
Q15054	DNA polymerase delta subunit 3 OS=Homo sapiens GN=POLD3 PE=1 SV=2	16.097	5	12	5	466	51.368
Q9BST9	Rhotekin OS=Homo sapiens GN=RTKN PE=1 SV=2	16.0868	4	10	4	563	62.628
P36776	Lon protease homolog, mitochondrial OS=Homo sapiens GN=LONP1 PE=1 SV=2	16.0426	5	12	5	959	106.422
P05141	ADP/ATP translocase 2 OS=Homo sapiens GN=SLC25A5 PE=1 SV=7	16.0302	6	29	3	298	32.831
Q8NHV4-3	Isoform 3 of Protein NEDD1 OS=Homo sapiens GN=NEDD1	16.0205	3	6	3	667	72.665
Q6R0H7	Guanine nucleotide-binding protein G(s) subunit alpha isoforms XLas OS=Mus musculus GN=Gnas PE=1 SV=1	15.9734	5	22	4	1133	121.429
P10321	HLA class I histocompatibility antigen, Cw-7 alpha chain OS=Homo sapiens GN=HLA-C PE=1 SV=3	15.9607	6	18	3	366	40.623
Q9Y4C2	TRPM8 channel-associated factor 1 OS=Homo sapiens GN=TCAF1 PE=1 SV=3	15.9441	6	16	6	921	102.061
P42696	RNA-binding protein 34 OS=Homo sapiens GN=RBM34 PE=1 SV=2	15.9441	5	14	5	430	48.535
Q96A49	Synapse-associated protein 1 OS=Homo sapiens GN=SYAP1 PE=1 SV=1	15.9418	3	20	3	352	39.909
P48449	Lanosterol synthase OS=Homo sapiens GN=LSS PE=1 SV=1	15.9174	4	12	4	732	83.255
Q4VCS5	Angiomotin OS=Homo sapiens GN=AMOT PE=1 SV=1	15.9133	5	12	5	1084	118.013
Q9Y6E2	Basic leucine zipper and W2 domain-containing protein 2 OS=Homo sapiens GN=BZW2 PE=1 SV=1	15.8949	8	26	6	419	48.132
Q28141	ATP-dependent RNA helicase A OS=Bos taurus GN=DHX9 PE=2 SV=1	15.8745	5	14	5	1287	141.854
Q9BY44	Eukaryotic translation initiation factor 2A OS=Homo sapiens GN=EIF2A PE=1 SV=3	15.8743	5	18	5	585	64.949
P49590	Probable histidine--tRNA ligase, mitochondrial OS=Homo sapiens GN=HARS2 PE=1 SV=1	15.8612	6	23	2	506	56.852
Q9BRX2	Protein pelota homolog OS=Homo sapiens GN=PELO PE=1 SV=2	15.853	5	18	5	385	43.332
Q6UN15	Pre-mRNA 3'-end-processing factor FIP1 OS=Homo sapiens GN=FIP1L1 PE=1 SV=1	15.8386	4	10	4	594	66.487
Q9NZB2-6	Isoform F of Constitutive coactivator of PPAR-gamma-like protein 1 OS=Homo sapiens GN=FAM120A	15.8313	4	8	4	1146	125.192
O60884	DnaJ homolog subfamily A member 2 OS=Homo sapiens GN=DNAJA2 PE=1 SV=1	15.8184	6	22	6	412	45.717
P55010	Eukaryotic translation initiation factor 5 OS=Homo sapiens GN=EIF5 PE=1 SV=2	15.7666	5	22	5	431	49.192
P18031	Tyrosine-protein phosphatase non-receptor type 1 OS=Homo sapiens GN=PTPN1 PE=1 SV=1	15.7565	4	18	4	435	49.935
O43847-2	Isoform 2 of Nardilysin OS=Homo sapiens GN=NRDC	15.732	5	10	5	1218	139.196
P12532	Creatine kinase U-type, mitochondrial OS=Homo sapiens GN=CKMT1A PE=1 SV=1	15.7106	5	22	5	417	47.007
Q15417	Calponin-3 OS=Homo sapiens GN=CNN3 PE=1 SV=1	15.6833	5	18	5	329	36.391
P17858	ATP-dependent 6-phosphofructokinase, liver type OS=Homo sapiens GN=PFKL PE=1 SV=6	15.6521	3	16	1	780	84.964
Q96S55	ATPase WRNIP1 OS=Homo sapiens GN=WRNIP1 PE=1 SV=2	15.6521	6	20	6	665	72.088
P39656	Dolichyl-diphosphooligosaccharide--protein glycosyltransferase 48 kDa subunit OS=Homo sapiens GN=DDOST PE=1 SV=4	15.6416	5	36	5	456	50.769
P51530	DNA replication ATP-dependent helicase/nuclease DNA2 OS=Homo sapiens GN=DNA2 PE=1 SV=3	15.6359	7	14	7	1060	120.337
Q92575	UBX domain-containing protein 4 OS=Homo sapiens GN=UBXN4 PE=1 SV=2	15.6269	4	16	4	508	56.743
Q8IYI6	Exocyst complex component 8 OS=Homo sapiens GN=EXOC8 PE=1 SV=2	15.6118	5	10	5	725	81.747
Q93034	Cullin-5 OS=Homo sapiens GN=CUL5 PE=1 SV=4	15.5932	5	18	5	780	90.897
P26038	Moesin OS=Homo sapiens GN=MSN PE=1 SV=3	15.5706	7	14	5	577	67.778
P34896	Serine hydroxymethyltransferase, cytosolic OS=Homo sapiens GN=SHMT1 PE=1 SV=1	15.5679	5	16	5	483	53.049
Q7L014	Probable ATP-dependent RNA helicase DDX46 OS=Homo sapiens GN=DDX46 PE=1 SV=2	15.559	5	10	5	1031	117.29
P50750-2	Isoform 2 of Cyclin-dependent kinase 9 OS=Homo sapiens GN=CDK9	15.5251	5	24	4	489	53.331
Q13283	Ras GTPase-activating protein-binding protein 1 OS=Homo sapiens GN=G3BP1 PE=1 SV=1	15.5013	3	12	3	466	52.132
P61163	Alpha-centractin OS=Homo sapiens GN=ACTR1A PE=1 SV=1	15.4696	6	20	3	376	42.587
P15252	Rubber elongation factor protein OS=Hevea brasiliensis PE=1 SV=2	15.469	5	60	5	138	14.713
P18615-3	Isoform 2 of Negative elongation factor E OS=Homo sapiens GN=NELFE	15.4628	3	12	3	387	43.898
Q04727-3	Isoform 3 of Transducin-like enhancer protein 4 OS=Homo sapiens GN=TLE4	15.4615	4	14	1	805	87.647
Q9UJW0	Dynactin subunit 4 OS=Homo sapiens GN=DCTN4 PE=1 SV=1	15.4271	5	20	5	460	52.304
P18754-2	Isoform 2 of Regulator of chromosome condensation OS=Homo sapiens GN=RCC1	15.4131	4	18	4	452	48.115
P48729-3	Isoform 3 of Casein kinase I isoform alpha OS=Homo sapiens GN=CSNK1A1	15.4129	4	22	1	325	37.543
P23193	Transcription elongation factor A protein 1 OS=Homo sapiens GN=TCEA1 PE=1 SV=2	15.3766	5	12	5	301	33.948
Q9BY77	Polymerase delta-interacting protein 3 OS=Homo sapiens GN=POLDIP3 PE=1 SV=2	15.3567	4	14	4	421	46.06
Q92769	Histone deacetylase 2 OS=Homo sapiens GN=HDAC2 PE=1 SV=2	15.3442	5	50	3	488	55.329
Q5T2T1	MAGUK p55 subfamily member 7 OS=Homo sapiens GN=MPP7 PE=1 SV=1	15.3042	5	10	5	576	65.483
P33991	DNA replication licensing factor MCM4 OS=Homo sapiens GN=MCM4 PE=1 SV=5	15.2993	6	12	6	863	96.498
Q63ZY3-2	Isoform 2 of KN motif and ankyrin repeat domain-containing protein 2 OS=Homo sapiens GN=KANK2	15.298	6	12	6	859	91.864
P39748	Flap endonuclease 1 OS=Homo sapiens GN=FEN1 PE=1 SV=1	15.258	4	14	4	380	42.566
Q9UBN7	Histone deacetylase 6 OS=Homo sapiens GN=HDAC6 PE=1 SV=2	15.2564	6	27	6	1215	131.336
Q9UQ84	Exonuclease 1 OS=Homo sapiens GN=EXO1 PE=1 SV=2	15.2497	5	10	5	846	94.045
O00311	Cell division cycle 7-related protein kinase OS=Homo sapiens GN=CDC7 PE=1 SV=1	15.2387	5	10	5	574	63.848
Q96P63-2	Isoform 2 of Serpin B12 OS=Homo sapiens GN=SERPINB12	15.2227	6	24	6	425	48.415
P42765	3-ketoacyl-CoA thiolase, mitochondrial OS=Homo sapiens GN=ACAA2 PE=1 SV=2	15.2092	3	12	3	397	41.898
Q8WYA0	Intraflagellar transport protein 81 homolog OS=Homo sapiens GN=IFT81 PE=1 SV=1	15.1974	4	8	4	676	79.696
P39023	60S ribosomal protein L3 OS=Homo sapiens GN=RPL3 PE=1 SV=2	15.1339	6	40	6	403	46.08
P33981	Dual specificity protein kinase TTK OS=Homo sapiens GN=TTK PE=1 SV=2	15.0907	6	16	6	857	97.011
Q96DF8	Protein DGCR14 OS=Homo sapiens GN=DGCR14 PE=1 SV=1	15.0888	4	8	4	476	52.536
Q9BZE1	39S ribosomal protein L37, mitochondrial OS=Homo sapiens GN=MRPL37 PE=1 SV=2	14.9896	6	20	6	423	48.087
O15269	Serine palmitoyltransferase 1 OS=Homo sapiens GN=SPTLC1 PE=1 SV=1	14.9848	4	12	4	473	52.71
O60701	UDP-glucose 6-dehydrogenase OS=Homo sapiens GN=UGDH PE=1 SV=1	14.9806	5	14	5	494	54.989
Q92973	Transportin-1 OS=Homo sapiens GN=TNPO1 PE=1 SV=2	14.9632	4	14	4	898	102.289
Q15051	IQ calmodulin-binding motif-containing protein 1 OS=Homo sapiens GN=IQCB1 PE=1 SV=1	14.8895	6	12	6	598	68.886
O00186	Syntaxin-binding protein 3 OS=Homo sapiens GN=STXBP3 PE=1 SV=2	14.888	5	12	5	592	67.721
Q9NTZ6	RNA-binding protein 12 OS=Homo sapiens GN=RBM12 PE=1 SV=1	14.8757	5	18	5	932	97.333
Q13596-3	Isoform 3 of Sorting nexin-1 OS=Homo sapiens GN=SNX1	14.8582	5	13	4	557	63.043
P11310-2	Isoform 2 of Medium-chain specific acyl-CoA dehydrogenase, mitochondrial OS=Homo sapiens GN=ACADM	14.855	4	16	4	425	46.99
Q7Z2T5	TRMT1-like protein OS=Homo sapiens GN=TRMT1L PE=1 SV=2	14.846	5	14	5	733	81.695
P17655	Calpain-2 catalytic subunit OS=Homo sapiens GN=CAPN2 PE=1 SV=6	14.8386	4	10	4	700	79.945
Q1KMD3	Heterogeneous nuclear ribonucleoprotein U-like protein 2 OS=Homo sapiens GN=HNRNPUL2 PE=1 SV=1	14.8044	6	14	6	747	85.052
P31350-2	Isoform 2 of Ribonucleoside-diphosphate reductase subunit M2 OS=Homo sapiens GN=RRM2	14.7995	5	16	4	449	51.06
Q5SWA1	Protein phosphatase 1 regulatory subunit 15B OS=Homo sapiens GN=PPP1R15B PE=1 SV=1	14.7991	3	10	3	713	79.102
Q13617-2	Isoform 2 of Cullin-2 OS=Homo sapiens GN=CUL2	14.779	5	16	5	764	89.434
P31930	Cytochrome b-c1 complex subunit 1, mitochondrial OS=Homo sapiens GN=UQCRC1 PE=1 SV=3	14.7674	4	22	3	480	52.612
Q9BZI7	Regulator of nonsense transcripts 3B OS=Homo sapiens GN=UPF3B PE=1 SV=1	14.73	4	8	4	483	57.727
P30837	Aldehyde dehydrogenase X, mitochondrial OS=Homo sapiens GN=ALDH1B1 PE=1 SV=3	14.7131	4	18	3	517	57.17
Q01650	Large neutral amino acids transporter small subunit 1 OS=Homo sapiens GN=SLC7A5 PE=1 SV=2	14.7061	3	14	3	507	54.974
Q8TC07	TBC1 domain family member 15 OS=Homo sapiens GN=TBC1D15 PE=1 SV=2	14.6896	5	10	5	691	79.44
Q9BXB4	Oxysterol-binding protein-related protein 11 OS=Homo sapiens GN=OSBPL11 PE=1 SV=2	14.6663	4	12	4	747	83.591
P78527	DNA-dependent protein kinase catalytic subunit OS=Homo sapiens GN=PRKDC PE=1 SV=3	14.6625	5	12	5	4128	468.788
Q9BVP2	Guanine nucleotide-binding protein-like 3 OS=Homo sapiens GN=GNL3 PE=1 SV=2	14.6624	5	14	5	549	61.954
Q5BKZ1	DBIRD complex subunit ZNF326 OS=Homo sapiens GN=ZNF326 PE=1 SV=2	14.6497	5	10	5	582	65.613
Q96EY7	Pentatricopeptide repeat domain-containing protein 3, mitochondrial OS=Homo sapiens GN=PTCD3 PE=1 SV=3	14.6222	4	10	4	689	78.5
Q00610	Clathrin heavy chain 1 OS=Homo sapiens GN=CLTC PE=1 SV=5	14.6025	5	10	5	1675	191.493
Q9NQ29	Putative RNA-binding protein Luc7-like 1 OS=Homo sapiens GN=LUC7L PE=1 SV=1	14.6001	3	22	1	371	43.701
Q9H3G5	Probable serine carboxypeptidase CPVL OS=Homo sapiens GN=CPVL PE=1 SV=2	14.5973	5	22	5	476	54.129
P54727	UV excision repair protein RAD23 homolog B OS=Homo sapiens GN=RAD23B PE=1 SV=1	14.5516	7	28	5	409	43.145
Q14157-5	Isoform 5 of Ubiquitin-associated protein 2-like OS=Homo sapiens GN=UBAP2L	14.5382	3	18	3	1104	116.569
O14757	Serine/threonine-protein kinase Chk1 OS=Homo sapiens GN=CHEK1 PE=1 SV=2	14.5253	5	18	5	476	54.399
Q9BUI4	DNA-directed RNA polymerase III subunit RPC3 OS=Homo sapiens GN=POLR3C PE=1 SV=1	14.5023	4	12	4	534	60.573
Q7Z3B4	Nucleoporin p54 OS=Homo sapiens GN=NUP54 PE=1 SV=2	14.4958	5	14	5	507	55.401
Q16204	Coiled-coil domain-containing protein 6 OS=Homo sapiens GN=CCDC6 PE=1 SV=2	14.493	5	12	5	474	53.258
P45974	Ubiquitin carboxyl-terminal hydrolase 5 OS=Homo sapiens GN=USP5 PE=1 SV=2	14.4682	5	10	5	858	95.725
P50454	Serpin H1 OS=Homo sapiens GN=SERPINH1 PE=1 SV=2	14.432	4	17	4	418	46.411
O75439	Mitochondrial-processing peptidase subunit beta OS=Homo sapiens GN=PMPCB PE=1 SV=2	14.4156	4	16	3	489	54.331
Q09161	Nuclear cap-binding protein subunit 1 OS=Homo sapiens GN=NCBP1 PE=1 SV=1	14.4023	5	14	5	790	91.781
P50213	Isocitrate dehydrogenase [NAD] subunit alpha, mitochondrial OS=Homo sapiens GN=IDH3A PE=1 SV=1	14.3853	5	16	5	366	39.566
Q12904-2	Isoform 2 of Aminoacyl tRNA synthase complex-interacting multifunctional protein 1 OS=Homo sapiens GN=AIMP1	14.3719	6	22	6	336	37.016
O75330-3	Isoform 3 of Hyaluronan mediated motility receptor OS=Homo sapiens GN=HMMR	14.3709	4	12	4	725	84.177
P51610-4	Isoform 4 of Host cell factor 1 OS=Homo sapiens GN=HCFC1	14.3705	4	12	4	2079	213.272
Q9P0L2	Serine/threonine-protein kinase MARK1 OS=Homo sapiens GN=MARK1 PE=1 SV=2	14.3698	6	14	2	795	88.947
O14745	Na(+)/H(+) exchange regulatory cofactor NHE-RF1 OS=Homo sapiens GN=SLC9A3R1 PE=1 SV=4	14.3479	3	15	3	358	38.845
P10515	Dihydrolipoyllysine-residue acetyltransferase component of pyruvate dehydrogenase complex, mitochondrial OS=Homo sapiens GN=DLAT PE=1 SV=3	14.3281	5	12	5	647	68.953
O60341-2	Isoform 2 of Lysine-specific histone demethylase 1A OS=Homo sapiens GN=KDM1A	14.3189	6	14	6	876	95.096
Q8TCG1	Protein CIP2A OS=Homo sapiens GN=KIAA1524 PE=1 SV=2	14.2989	8	18	8	905	102.121
Q96B23	Uncharacterized protein C18orf25 OS=Homo sapiens GN=C18orf25 PE=1 SV=2	14.2936	4	14	4	403	43.298
Q4V328	GRIP1-associated protein 1 OS=Homo sapiens GN=GRIPAP1 PE=1 SV=1	14.2904	4	8	4	841	95.931
P18858	DNA ligase 1 OS=Homo sapiens GN=LIG1 PE=1 SV=1	14.2832	4	10	4	919	101.673
Q6P996	Pyridoxal-dependent decarboxylase domain-containing protein 1 OS=Homo sapiens GN=PDXDC1 PE=1 SV=2	14.2772	5	10	5	788	86.652
Q8TCS8	Polyribonucleotide nucleotidyltransferase 1, mitochondrial OS=Homo sapiens GN=PNPT1 PE=1 SV=2	14.2664	4	8	4	783	85.897
Q92615	La-related protein 4B OS=Homo sapiens GN=LARP4B PE=1 SV=3	14.2653	4	10	4	738	80.503
Q9Y4P3	Transducin beta-like protein 2 OS=Homo sapiens GN=TBL2 PE=1 SV=1	14.2347	5	19	5	447	49.766
P54578	Ubiquitin carboxyl-terminal hydrolase 14 OS=Homo sapiens GN=USP14 PE=1 SV=3	14.1952	5	17	5	494	56.033
P09104	Gamma-enolase OS=Homo sapiens GN=ENO2 PE=1 SV=3	14.1888	3	22	2	434	47.239
Q9H9A6	Leucine-rich repeat-containing protein 40 OS=Homo sapiens GN=LRRC40 PE=1 SV=1	14.1849	7	14	7	602	68.207
Q9NXW2-2	Isoform 2 of DnaJ homolog subfamily B member 12 OS=Homo sapiens GN=DNAJB12	14.1836	5	17	5	377	42.237
O94874	E3 UFM1-protein ligase 1 OS=Homo sapiens GN=UFL1 PE=1 SV=2	14.1747	5	16	5	794	89.54
P52907	F-actin-capping protein subunit alpha-1 OS=Homo sapiens GN=CAPZA1 PE=1 SV=3	14.1732	4	22	3	286	32.902
Q9Y285	Phenylalanine--tRNA ligase alpha subunit OS=Homo sapiens GN=FARSA PE=1 SV=3	14.1674	4	20	4	508	57.528
Q8TAT6-2	Isoform 2 of Nuclear protein localization protein 4 homolog OS=Homo sapiens GN=NPLOC4	14.1397	6	12	6	617	69.417
Q9HCE1	Putative helicase MOV-10 OS=Homo sapiens GN=MOV10 PE=1 SV=2	14.1279	4	8	4	1003	113.599
Q08122-4	Isoform 4 of Transducin-like enhancer protein 3 OS=Mus musculus GN=Tle3	14.1165	4	10	3	782	84.455
P11172	Uridine 5'-monophosphate synthase OS=Homo sapiens GN=UMPS PE=1 SV=1	14.102	6	18	6	480	52.189
A5A6K8	Aspartate aminotransferase, cytoplasmic OS=Pan troglodytes GN=GOT1 PE=2 SV=1	14.0891	5	24	5	413	46.205
Q14C86-6	Isoform 6 of GTPase-activating protein and VPS9 domain-containing protein 1 OS=Homo sapiens GN=GAPVD1	14.0879	3	8	3	1487	166.064
P26599-3	Isoform 3 of Polypyrimidine tract-binding protein 1 OS=Homo sapiens GN=PTBP1	14.0853	4	24	4	557	59.596
Q9UKX7	Nuclear pore complex protein Nup50 OS=Homo sapiens GN=NUP50 PE=1 SV=2	14.0451	3	15	3	468	50.113
Q15018	BRISC complex subunit Abro1 OS=Homo sapiens GN=FAM175B PE=1 SV=2	14.0202	4	14	4	415	46.872
P11413-2	Isoform Long of Glucose-6-phosphate 1-dehydrogenase OS=Homo sapiens GN=G6PD	13.997	5	22	5	561	63.786
Q96KP1	Exocyst complex component 2 OS=Homo sapiens GN=EXOC2 PE=1 SV=1	13.9941	5	12	5	924	104
Q01581	Hydroxymethylglutaryl-CoA synthase, cytoplasmic OS=Homo sapiens GN=HMGCS1 PE=1 SV=2	13.9932	4	22	4	520	57.257
O43776	Asparagine--tRNA ligase, cytoplasmic OS=Homo sapiens GN=NARS PE=1 SV=1	13.967	5	14	5	548	62.903
Q92734	Protein TFG OS=Homo sapiens GN=TFG PE=1 SV=2	13.9608	5	24	5	400	43.421
P63104	14-3-3 protein zeta/delta OS=Homo sapiens GN=YWHAZ PE=1 SV=1	13.9088	5	22	4	245	27.728
Q8TB72-3	Isoform 3 of Pumilio homolog 2 OS=Homo sapiens GN=PUM2	13.8949	4	10	1	1064	113.933
Q04206	Transcription factor p65 OS=Homo sapiens GN=RELA PE=1 SV=2	13.8868	5	11	5	551	60.181
P08729	Keratin, type II cytoskeletal 7 OS=Homo sapiens GN=KRT7 PE=1 SV=5	13.8808	6	45	3	469	51.354
P81187	Complement factor B OS=Bos taurus GN=CFB PE=1 SV=2	13.8567	4	12	4	761	85.312
O95490-6	Isoform 6 of Adhesion G protein-coupled receptor L2 OS=Homo sapiens GN=ADGRL2	13.8539	5	12	5	1474	164.961
Q14254	Flotillin-2 OS=Homo sapiens GN=FLOT2 PE=1 SV=2	13.8395	5	13	5	428	47.035
P50416	Carnitine O-palmitoyltransferase 1, liver isoform OS=Homo sapiens GN=CPT1A PE=1 SV=2	13.8391	5	14	5	773	88.311
Q9UBU9	Nuclear RNA export factor 1 OS=Homo sapiens GN=NXF1 PE=1 SV=1	13.8367	4	8	4	619	70.139
P48735	Isocitrate dehydrogenase [NADP], mitochondrial OS=Homo sapiens GN=IDH2 PE=1 SV=2	13.8331	5	14	5	452	50.877
O75306	NADH dehydrogenase [ubiquinone] iron-sulfur protein 2, mitochondrial OS=Homo sapiens GN=NDUFS2 PE=1 SV=2	13.8274	5	17	5	463	52.512
Q8WUA2	Peptidyl-prolyl cis-trans isomerase-like 4 OS=Homo sapiens GN=PPIL4 PE=1 SV=1	13.7952	5	12	5	492	57.189
O15160	DNA-directed RNA polymerases I and III subunit RPAC1 OS=Homo sapiens GN=POLR1C PE=1 SV=1	13.7898	4	20	4	346	39.225
Q15293	Reticulocalbin-1 OS=Homo sapiens GN=RCN1 PE=1 SV=1	13.775	4	18	4	331	38.866
Q13155	Aminoacyl tRNA synthase complex-interacting multifunctional protein 2 OS=Homo sapiens GN=AIMP2 PE=1 SV=2	13.7482	4	18	4	320	35.326
O43301	Heat shock 70 kDa protein 12A OS=Homo sapiens GN=HSPA12A PE=1 SV=2	13.7217	3	8	3	675	74.931
Q9UNM6-2	Isoform 2 of 26S proteasome non-ATPase regulatory subunit 13 OS=Homo sapiens GN=PSMD13	13.7059	5	18	5	378	42.915
P40937	Replication factor C subunit 5 OS=Homo sapiens GN=RFC5 PE=1 SV=1	13.6966	7	18	7	340	38.472
Q13112	Chromatin assembly factor 1 subunit B OS=Homo sapiens GN=CHAF1B PE=1 SV=1	13.6688	4	11	4	559	61.454
Q86VS8	Protein Hook homolog 3 OS=Homo sapiens GN=HOOK3 PE=1 SV=2	13.6673	4	10	4	718	83.074
Q9NUQ8	ATP-binding cassette sub-family F member 3 OS=Homo sapiens GN=ABCF3 PE=1 SV=2	13.66	5	10	5	709	79.695
Q96IZ0	PRKC apoptosis WT1 regulator protein OS=Homo sapiens GN=PAWR PE=1 SV=1	13.6533	3	8	3	340	36.545
O95747	Serine/threonine-protein kinase OSR1 OS=Homo sapiens GN=OXSR1 PE=1 SV=1	13.6333	3	8	2	527	57.986
Q9BZE4	Nucleolar GTP-binding protein 1 OS=Homo sapiens GN=GTPBP4 PE=1 SV=3	13.6206	6	12	6	634	73.918
O43815	Striatin OS=Homo sapiens GN=STRN PE=1 SV=4	13.6074	5	10	5	780	86.079
P35520-2	Isoform 2 of Cystathionine beta-synthase OS=Homo sapiens GN=CBS	13.5872	5	22	5	565	61.824
P30566	Adenylosuccinate lyase OS=Homo sapiens GN=ADSL PE=1 SV=2	13.5516	5	14	5	484	54.854
O75155	Cullin-associated NEDD8-dissociated protein 2 OS=Homo sapiens GN=CAND2 PE=1 SV=3	13.5413	4	12	2	1236	135.171
O14974	Protein phosphatase 1 regulatory subunit 12A OS=Homo sapiens GN=PPP1R12A PE=1 SV=1	13.5294	4	8	4	1030	115.211
Q96F07	Cytoplasmic FMR1-interacting protein 2 OS=Homo sapiens GN=CYFIP2 PE=1 SV=2	13.5046	4	10	4	1278	148.302
Q8IUR7	Armadillo repeat-containing protein 8 OS=Homo sapiens GN=ARMC8 PE=1 SV=2	13.4902	5	14	5	673	75.46
O76003	Glutaredoxin-3 OS=Homo sapiens GN=GLRX3 PE=1 SV=2	13.4686	5	17	5	335	37.408
Q9BSJ2-4	Isoform 3 of Gamma-tubulin complex component 2 OS=Homo sapiens GN=TUBGCP2	13.4662	6	12	6	930	105.561
O75152	Zinc finger CCCH domain-containing protein 11A OS=Homo sapiens GN=ZC3H11A PE=1 SV=3	13.4552	4	8	4	810	89.076
Q99755	Phosphatidylinositol 4-phosphate 5-kinase type-1 alpha OS=Homo sapiens GN=PIP5K1A PE=1 SV=1	13.455	6	12	6	562	62.594
Q13895	Bystin OS=Homo sapiens GN=BYSL PE=1 SV=3	13.4413	5	18	5	437	49.57
P52306-5	Isoform 5 of Rap1 GTPase-GDP dissociation stimulator 1 OS=Homo sapiens GN=RAP1GDS1	13.4144	5	12	5	608	66.346
Q7L2H7	Eukaryotic translation initiation factor 3 subunit M OS=Homo sapiens GN=EIF3M PE=1 SV=1	13.414	4	10	4	374	42.476
Q8IWC1	MAP7 domain-containing protein 3 OS=Homo sapiens GN=MAP7D3 PE=1 SV=2	13.3992	5	10	5	876	98.368
P14152	Malate dehydrogenase, cytoplasmic OS=Mus musculus GN=Mdh1 PE=1 SV=3	13.3803	4	16	1	334	36.488
Q96I25	Splicing factor 45 OS=Homo sapiens GN=RBM17 PE=1 SV=1	13.3458	3	9	3	401	44.934
Q9Y6I9	Testis-expressed sequence 264 protein OS=Homo sapiens GN=TEX264 PE=1 SV=1	13.3257	4	14	4	313	34.167
Q14168-4	Isoform 4 of MAGUK p55 subfamily member 2 OS=Homo sapiens GN=MPP2	13.3229	4	12	3	597	66.76
Q4G0N4	NAD kinase 2, mitochondrial OS=Homo sapiens GN=NADK2 PE=1 SV=2	13.3019	3	6	3	442	49.402
Q15738	Sterol-4-alpha-carboxylate 3-dehydrogenase, decarboxylating OS=Homo sapiens GN=NSDHL PE=1 SV=2	13.2576	6	22	6	373	41.874
Q8NBJ5	Procollagen galactosyltransferase 1 OS=Homo sapiens GN=COLGALT1 PE=1 SV=1	13.2535	5	10	5	622	71.59
P52294	Importin subunit alpha-5 OS=Homo sapiens GN=KPNA1 PE=1 SV=3	13.2504	3	12	3	538	60.184
P49589-3	Isoform 3 of Cysteine--tRNA ligase, cytoplasmic OS=Homo sapiens GN=CARS	13.248	4	12	4	831	94.578
Q14244-7	Isoform 7 of Ensconsin OS=Homo sapiens GN=MAP7	13.224	4	10	4	771	86.9
Q6NXE6	Armadillo repeat-containing protein 6 OS=Homo sapiens GN=ARMC6 PE=1 SV=2	13.2185	5	20	5	501	54.107
Q5TAQ9	DDB1- and CUL4-associated factor 8 OS=Homo sapiens GN=DCAF8 PE=1 SV=1	13.2127	2	8	2	597	66.811
Q9BVJ6	U3 small nucleolar RNA-associated protein 14 homolog A OS=Homo sapiens GN=UTP14A PE=1 SV=1	13.1873	4	10	4	771	87.924
P54619-3	Isoform 3 of 5'-AMP-activated protein kinase subunit gamma-1 OS=Homo sapiens GN=PRKAG1	13.1795	5	20	5	340	38.508
Q9UJX5-3	Isoform 3 of Anaphase-promoting complex subunit 4 OS=Homo sapiens GN=ANAPC4	13.152	4	8	4	809	92.157
P47755	F-actin-capping protein subunit alpha-2 OS=Homo sapiens GN=CAPZA2 PE=1 SV=3	13.1414	4	14	3	286	32.929
Q29RF7	Sister chromatid cohesion protein PDS5 homolog A OS=Homo sapiens GN=PDS5A PE=1 SV=1	13.1366	3	6	3	1337	150.734
Q9H6R7	WD repeat and coiled-coil-containing protein C2orf44 OS=Homo sapiens GN=C2orf44 PE=1 SV=1	13.1347	5	12	5	721	79.086
Q96N66	Lysophospholipid acyltransferase 7 OS=Homo sapiens GN=MBOAT7 PE=1 SV=2	13.1222	4	10	4	472	52.73
P43686	26S protease regulatory subunit 6B OS=Homo sapiens GN=PSMC4 PE=1 SV=2	13.0978	4	16	4	418	47.337
P30520	Adenylosuccinate synthetase isozyme 2 OS=Homo sapiens GN=ADSS PE=1 SV=3	13.0974	5	14	5	456	50.066
P61962	DDB1- and CUL4-associated factor 7 OS=Homo sapiens GN=DCAF7 PE=1 SV=1	13.0874	6	18	6	342	38.901
Q9NSE4	Isoleucine--tRNA ligase, mitochondrial OS=Homo sapiens GN=IARS2 PE=1 SV=2	13.0644	3	10	3	1012	113.719
Q05682	Caldesmon OS=Homo sapiens GN=CALD1 PE=1 SV=3	13.0529	3	8	3	793	93.175
P11274	Breakpoint cluster region protein OS=Homo sapiens GN=BCR PE=1 SV=2	13.0085	4	8	4	1271	142.73
Q9BXJ9	N-alpha-acetyltransferase 15, NatA auxiliary subunit OS=Homo sapiens GN=NAA15 PE=1 SV=1	12.971	5	14	5	866	101.208
P20020	Plasma membrane calcium-transporting ATPase 1 OS=Homo sapiens GN=ATP2B1 PE=1 SV=3	12.9641	3	6	1	1258	138.668
O00178	GTP-binding protein 1 OS=Homo sapiens GN=GTPBP1 PE=1 SV=3	12.9586	4	8	4	669	72.408
Q13435	Splicing factor 3B subunit 2 OS=Homo sapiens GN=SF3B2 PE=1 SV=2	12.9542	6	12	6	895	100.165
Q6P3W7	SCY1-like protein 2 OS=Homo sapiens GN=SCYL2 PE=1 SV=1	12.9432	3	6	3	929	103.642
Q15031	Probable leucine--tRNA ligase, mitochondrial OS=Homo sapiens GN=LARS2 PE=1 SV=2	12.9322	6	12	6	903	101.911
O15379-2	Isoform 2 of Histone deacetylase 3 OS=Homo sapiens GN=HDAC3	12.9102	4	14	3	429	49.08
Q96AY3	Peptidyl-prolyl cis-trans isomerase FKBP10 OS=Homo sapiens GN=FKBP10 PE=1 SV=1	12.9084	2	8	2	582	64.204
Q15020	Squamous cell carcinoma antigen recognized by T-cells 3 OS=Homo sapiens GN=SART3 PE=1 SV=1	12.9009	5	10	5	963	109.865
O43237	Cytoplasmic dynein 1 light intermediate chain 2 OS=Homo sapiens GN=DYNC1LI2 PE=1 SV=1	12.8971	4	20	4	492	54.066
O75616	GTPase Era, mitochondrial OS=Homo sapiens GN=ERAL1 PE=1 SV=2	12.8781	5	22	5	437	48.319
Q7L5Y9	Macrophage erythroblast attacher OS=Homo sapiens GN=MAEA PE=1 SV=1	12.875	6	14	6	396	45.258
P05556	Integrin beta-1 OS=Homo sapiens GN=ITGB1 PE=1 SV=2	12.8534	5	10	5	798	88.357
Q99729-2	Isoform 2 of Heterogeneous nuclear ribonucleoprotein A/B OS=Homo sapiens GN=HNRNPAB	12.8387	3	18	2	332	35.945
Q7L5N7	Lysophosphatidylcholine acyltransferase 2 OS=Homo sapiens GN=LPCAT2 PE=1 SV=1	12.838	4	13	4	544	60.169
O95400	CD2 antigen cytoplasmic tail-binding protein 2 OS=Homo sapiens GN=CD2BP2 PE=1 SV=1	12.7869	3	14	3	341	37.623
Q9UBM7	7-dehydrocholesterol reductase OS=Homo sapiens GN=DHCR7 PE=1 SV=1	12.7795	4	16	4	475	54.454
Q96MX6	WD repeat-containing protein 92 OS=Homo sapiens GN=WDR92 PE=1 SV=1	12.766	5	11	5	357	39.715
O75027-2	Isoform 2 of ATP-binding cassette sub-family B member 7, mitochondrial OS=Homo sapiens GN=ABCB7	12.7438	4	10	4	753	82.717
Q9UHG3	Prenylcysteine oxidase 1 OS=Homo sapiens GN=PCYOX1 PE=1 SV=3	12.7337	5	22	5	505	56.604
P49840	Glycogen synthase kinase-3 alpha OS=Homo sapiens GN=GSK3A PE=1 SV=2	12.7155	6	16	3	483	50.949
Q9UBT2	SUMO-activating enzyme subunit 2 OS=Homo sapiens GN=UBA2 PE=1 SV=2	12.6886	5	12	5	640	71.179
O15320	cTAGE family member 5 OS=Homo sapiens GN=CTAGE5 PE=1 SV=4	12.668	3	6	3	804	90.94
Q8WWK9	Cytoskeleton-associated protein 2 OS=Homo sapiens GN=CKAP2 PE=1 SV=1	12.6658	3	6	3	683	76.939
Q92540-4	Isoform 4 of Protein SMG7 OS=Homo sapiens GN=SMG7	12.6633	5	10	5	1178	131.568
O43795	Unconventional myosin-Ib OS=Homo sapiens GN=MYO1B PE=1 SV=3	12.6597	6	14	6	1136	131.902
Q8NEZ5	F-box only protein 22 OS=Homo sapiens GN=FBXO22 PE=1 SV=1	12.6594	4	14	4	403	44.48
Q8TCT9-2	Isoform 2 of Minor histocompatibility antigen H13 OS=Homo sapiens GN=HM13	12.6417	3	32	3	426	46.795
Q96P11-4	Isoform 4 of Probable 28S rRNA (cytosine-C(5))-methyltransferase OS=Homo sapiens GN=NSUN5	12.6343	4	13	4	470	51.029
O60568	Procollagen-lysine,2-oxoglutarate 5-dioxygenase 3 OS=Homo sapiens GN=PLOD3 PE=1 SV=1	12.6171	4	14	4	738	84.731
Q7Z4V5	Hepatoma-derived growth factor-related protein 2 OS=Homo sapiens GN=HDGFRP2 PE=1 SV=1	12.6156	4	8	4	671	74.272
Q9Y5A7	NEDD8 ultimate buster 1 OS=Homo sapiens GN=NUB1 PE=1 SV=2	12.612	4	8	4	615	70.494
O75665	Oral-facial-digital syndrome 1 protein OS=Homo sapiens GN=OFD1 PE=1 SV=1	12.6029	3	8	3	1012	116.599
Q16637	Survival motor neuron protein OS=Homo sapiens GN=SMN1 PE=1 SV=1	12.5872	4	14	4	294	31.828
Q68CZ6	HAUS augmin-like complex subunit 3 OS=Homo sapiens GN=HAUS3 PE=1 SV=1	12.5846	3	8	3	603	69.607
Q96AG4	Leucine-rich repeat-containing protein 59 OS=Homo sapiens GN=LRRC59 PE=1 SV=1	12.5658	5	14	5	307	34.909
P53367-2	Isoform A of Arfaptin-1 OS=Homo sapiens GN=ARFIP1	12.5269	4	22	1	341	38.575
Q9NVC6	Mediator of RNA polymerase II transcription subunit 17 OS=Homo sapiens GN=MED17 PE=1 SV=2	12.5213	4	8	4	651	72.845
O75844	CAAX prenyl protease 1 homolog OS=Homo sapiens GN=ZMPSTE24 PE=1 SV=2	12.5193	4	18	4	475	54.778
P53367	Arfaptin-1 OS=Homo sapiens GN=ARFIP1 PE=1 SV=2	12.5068	4	18	1	373	41.713
O14828	Secretory carrier-associated membrane protein 3 OS=Homo sapiens GN=SCAMP3 PE=1 SV=3	12.494	3	11	3	347	38.262
Q93008	Probable ubiquitin carboxyl-terminal hydrolase FAF-X OS=Homo sapiens GN=USP9X PE=1 SV=3	12.4866	4	10	4	2570	292.094
P67775	Serine/threonine-protein phosphatase 2A catalytic subunit alpha isoform OS=Homo sapiens GN=PPP2CA PE=1 SV=1	12.4805	3	8	3	309	35.571
O75122-3	Isoform 3 of CLIP-associating protein 2 OS=Homo sapiens GN=CLASP2	12.4573	3	6	3	1515	165.821
Q8IZP0	Abl interactor 1 OS=Homo sapiens GN=ABI1 PE=1 SV=4	12.4469	4	10	2	508	55.047
P09651	Heterogeneous nuclear ribonucleoprotein A1 OS=Homo sapiens GN=HNRNPA1 PE=1 SV=5	12.4164	4	16	4	372	38.723
Q9UHB6-4	Isoform 4 of LIM domain and actin-binding protein 1 OS=Homo sapiens GN=LIMA1	12.4058	4	8	4	760	85.171
Q9BVS4	Serine/threonine-protein kinase RIO2 OS=Homo sapiens GN=RIOK2 PE=1 SV=2	12.3932	4	10	4	552	63.243
Q01968	Inositol polyphosphate 5-phosphatase OCRL-1 OS=Homo sapiens GN=OCRL PE=1 SV=3	12.3833	4	10	4	901	104.138
Q96JJ3	Engulfment and cell motility protein 2 OS=Homo sapiens GN=ELMO2 PE=1 SV=2	12.3754	4	8	4	720	82.562
Q9UH62	Armadillo repeat-containing X-linked protein 3 OS=Homo sapiens GN=ARMCX3 PE=1 SV=1	12.3518	4	12	4	379	42.474
P98175	RNA-binding protein 10 OS=Homo sapiens GN=RBM10 PE=1 SV=3	12.3464	3	6	3	930	103.469
Q8WXI9	Transcriptional repressor p66-beta OS=Homo sapiens GN=GATAD2B PE=1 SV=1	12.3361	4	8	3	593	65.22
Q9NSK0-3	Isoform 3 of Kinesin light chain 4 OS=Homo sapiens GN=KLC4	12.3246	4	8	2	637	70.509
Q9BTW9-4	Isoform 4 of Tubulin-specific chaperone D OS=Homo sapiens GN=TBCD	12.3155	4	12	4	1248	138.58
P15357	Ubiquitin-40S ribosomal protein S27a OS=Drosophila melanogaster GN=RpS27A PE=1 SV=2	12.313	4	59	4	156	17.929
O75436	Vacuolar protein sorting-associated protein 26A OS=Homo sapiens GN=VPS26A PE=1 SV=2	12.2755	4	16	4	327	38.146
Q9Y6K9-2	Isoform 2 of NF-kappa-B essential modulator OS=Homo sapiens GN=IKBKG	12.2647	4	12	4	487	55.751
P09972	Fructose-bisphosphate aldolase C OS=Homo sapiens GN=ALDOC PE=1 SV=2	12.2583	2	25	2	364	39.431
Q52LJ0-2	Isoform 2 of Protein FAM98B OS=Homo sapiens GN=FAM98B	12.2534	3	16	3	433	45.519
Q96ER3	Protein SAAL1 OS=Homo sapiens GN=SAAL1 PE=1 SV=2	12.248	3	16	3	474	53.524
P46109	Crk-like protein OS=Homo sapiens GN=CRKL PE=1 SV=1	12.2379	4	10	4	303	33.756
Q9NQL2	Ras-related GTP-binding protein D OS=Homo sapiens GN=RRAGD PE=1 SV=1	12.2016	2	8	2	400	45.559
A0AVT1	Ubiquitin-like modifier-activating enzyme 6 OS=Homo sapiens GN=UBA6 PE=1 SV=1	12.1995	5	10	5	1052	117.895
Q02878	60S ribosomal protein L6 OS=Homo sapiens GN=RPL6 PE=1 SV=3	12.1858	5	26	5	288	32.708
Q5SQN1	Synaptosomal-associated protein 47 OS=Homo sapiens GN=SNAP47 PE=1 SV=3	12.1798	2	12	2	464	52.529
O75533	Splicing factor 3B subunit 1 OS=Homo sapiens GN=SF3B1 PE=1 SV=3	12.1455	4	8	4	1304	145.738
P37268	Squalene synthase OS=Homo sapiens GN=FDFT1 PE=1 SV=1	12.1385	4	12	4	417	48.084
Q14684	Ribosomal RNA processing protein 1 homolog B OS=Homo sapiens GN=RRP1B PE=1 SV=3	12.1346	3	8	3	758	84.375
Q14103	Heterogeneous nuclear ribonucleoprotein D0 OS=Homo sapiens GN=HNRNPD PE=1 SV=1	12.132	3	27	2	355	38.41
Q9Y6E0	Serine/threonine-protein kinase 24 OS=Homo sapiens GN=STK24 PE=1 SV=1	12.1301	4	10	2	443	49.277
Q15942	Zyxin OS=Homo sapiens GN=ZYX PE=1 SV=1	12.124	3	6	3	572	61.238
P49321-3	Isoform 3 of Nuclear autoantigenic sperm protein OS=Homo sapiens GN=NASP	12.0992	5	24	5	790	86.216
O95782	AP-2 complex subunit alpha-1 OS=Homo sapiens GN=AP2A1 PE=1 SV=3	12.0737	4	10	3	977	107.478
O14777	Kinetochore protein NDC80 homolog OS=Homo sapiens GN=NDC80 PE=1 SV=1	12.0621	5	10	5	642	73.867
Q9Y5X3	Sorting nexin-5 OS=Homo sapiens GN=SNX5 PE=1 SV=1	12.0375	5	22	4	404	46.787
Q8IYS1	Peptidase M20 domain-containing protein 2 OS=Homo sapiens GN=PM20D2 PE=1 SV=2	12.0372	4	10	4	436	47.746
P27540	Aryl hydrocarbon receptor nuclear translocator OS=Homo sapiens GN=ARNT PE=1 SV=1	12.0358	2	4	2	789	86.582
Q9ULA0	Aspartyl aminopeptidase OS=Homo sapiens GN=DNPEP PE=1 SV=1	12.0154	3	9	3	475	52.395
Q86X55	Histone-arginine methyltransferase CARM1 OS=Homo sapiens GN=CARM1 PE=1 SV=3	12.0068	4	16	4	608	65.811
P48637	Glutathione synthetase OS=Homo sapiens GN=GSS PE=1 SV=1	11.9798	6	20	6	474	52.352
Q8WUQ7-2	Isoform 2 of Cactin OS=Homo sapiens GN=CACTIN	11.9779	2	6	2	935	107.871
Q9BZJ0	Crooked neck-like protein 1 OS=Homo sapiens GN=CRNKL1 PE=1 SV=4	11.9603	4	8	4	848	100.389
Q8NBF2	NHL repeat-containing protein 2 OS=Homo sapiens GN=NHLRC2 PE=1 SV=1	11.96	4	10	4	726	79.393
O14867	Transcription regulator protein BACH1 OS=Homo sapiens GN=BACH1 PE=1 SV=2	11.9577	4	10	4	736	81.906
Q96T51	RUN and FYVE domain-containing protein 1 OS=Homo sapiens GN=RUFY1 PE=1 SV=2	11.9041	4	8	4	708	79.767
Q9JLJ3	4-trimethylaminobutyraldehyde dehydrogenase OS=Rattus norvegicus GN=Aldh9a1 PE=1 SV=1	11.8974	3	12	1	494	53.618
Q92599	Septin-8 OS=Homo sapiens GN=SEPT8 PE=1 SV=4	11.8888	4	24	2	483	55.721
Q8N1G4	Leucine-rich repeat-containing protein 47 OS=Homo sapiens GN=LRRC47 PE=1 SV=1	11.8803	4	8	4	583	63.434
Q9Y2D8	Afadin- and alpha-actinin-binding protein OS=Homo sapiens GN=SSX2IP PE=1 SV=3	11.8795	4	8	4	614	71.191
Q13501	Sequestosome-1 OS=Homo sapiens GN=SQSTM1 PE=1 SV=1	11.8793	3	14	3	440	47.657
Q6ZW76	Ankyrin repeat and SAM domain-containing protein 3 OS=Homo sapiens GN=ANKS3 PE=1 SV=1	11.8763	4	12	4	656	71.993
Q3KQU3	MAP7 domain-containing protein 1 OS=Homo sapiens GN=MAP7D1 PE=1 SV=1	11.8727	3	8	3	841	92.764
Q08170	Serine/arginine-rich splicing factor 4 OS=Homo sapiens GN=SRSF4 PE=1 SV=2	11.7982	4	19	3	494	56.645
Q6P2E9	Enhancer of mRNA-decapping protein 4 OS=Homo sapiens GN=EDC4 PE=1 SV=1	11.7955	4	8	4	1401	151.567
P78318	Immunoglobulin-binding protein 1 OS=Homo sapiens GN=IGBP1 PE=1 SV=1	11.7797	4	11	4	339	39.198
P11216	Glycogen phosphorylase, brain form OS=Homo sapiens GN=PYGB PE=1 SV=5	11.7748	4	8	2	843	96.635
Q9BSJ8-2	Isoform 2 of Extended synaptotagmin-1 OS=Homo sapiens GN=ESYT1	11.7628	3	6	3	1114	123.925
Q9H6Z4	Ran-binding protein 3 OS=Homo sapiens GN=RANBP3 PE=1 SV=1	11.7503	2	10	2	567	60.173
Q9BQ39	ATP-dependent RNA helicase DDX50 OS=Homo sapiens GN=DDX50 PE=1 SV=1	11.7456	4	11	2	737	82.514
O15381	Nuclear valosin-containing protein-like OS=Homo sapiens GN=NVL PE=1 SV=1	11.7175	3	6	3	856	94.991
Q9UHR4	Brain-specific angiogenesis inhibitor 1-associated protein 2-like protein 1 OS=Homo sapiens GN=BAIAP2L1 PE=1 SV=2	11.7155	3	8	3	511	56.847
Q14680	Maternal embryonic leucine zipper kinase OS=Homo sapiens GN=MELK PE=1 SV=3	11.7152	5	10	5	651	74.594
P51398	28S ribosomal protein S29, mitochondrial OS=Homo sapiens GN=DAP3 PE=1 SV=1	11.7145	5	18	5	398	45.538
Q96BY7	Autophagy-related protein 2 homolog B OS=Homo sapiens GN=ATG2B PE=1 SV=5	11.7073	3	11	3	2078	232.616
Q9Y5Q9	General transcription factor 3C polypeptide 3 OS=Homo sapiens GN=GTF3C3 PE=1 SV=1	11.7019	4	12	4	886	101.208
O43264	Centromere/kinetochore protein zw10 homolog OS=Homo sapiens GN=ZW10 PE=1 SV=3	11.6922	3	8	3	779	88.773
O82803	Small rubber particle protein OS=Hevea brasiliensis GN=SRPP PE=1 SV=1	11.6669	3	16	3	204	22.331
Q12996	Cleavage stimulation factor subunit 3 OS=Homo sapiens GN=CSTF3 PE=1 SV=1	11.6574	4	10	4	717	82.869
P42224	Signal transducer and activator of transcription 1-alpha/beta OS=Homo sapiens GN=STAT1 PE=1 SV=2	11.631	4	12	4	750	87.28
Q9UHD9	Ubiquilin-2 OS=Homo sapiens GN=UBQLN2 PE=1 SV=2	11.6308	3	6	2	624	65.655
Q96RT8	Gamma-tubulin complex component 5 OS=Homo sapiens GN=TUBGCP5 PE=1 SV=1	11.6119	4	8	4	1024	118.246
Q99614	Tetratricopeptide repeat protein 1 OS=Homo sapiens GN=TTC1 PE=1 SV=1	11.5868	4	12	4	292	33.505
P62258	14-3-3 protein epsilon OS=Homo sapiens GN=YWHAE PE=1 SV=1	11.5827	4	16	3	255	29.155
Q03555-3	Isoform 2 of Gephyrin OS=Rattus norvegicus GN=Gphn	11.5819	3	6	3	772	83.585
Q9NYY8	FAST kinase domain-containing protein 2, mitochondrial OS=Homo sapiens GN=FASTKD2 PE=1 SV=1	11.5811	3	12	3	710	81.41
Q8NG27	E3 ubiquitin-protein ligase Praja-1 OS=Homo sapiens GN=PJA1 PE=1 SV=2	11.5746	3	14	2	643	70.959
Q15435	Protein phosphatase 1 regulatory subunit 7 OS=Homo sapiens GN=PPP1R7 PE=1 SV=1	11.5712	4	11	4	360	41.539
Q8NI60	Atypical kinase ADCK3, mitochondrial OS=Homo sapiens GN=ADCK3 PE=1 SV=1	11.5308	4	11	4	647	71.904
Q9H900	Protein zwilch homolog OS=Homo sapiens GN=ZWILCH PE=1 SV=2	11.5246	2	6	2	591	67.172
O14908	PDZ domain-containing protein GIPC1 OS=Homo sapiens GN=GIPC1 PE=1 SV=2	11.5178	3	8	3	333	36.027
Q6KB66-3	Isoform 3 of Keratin, type II cytoskeletal 80 OS=Homo sapiens GN=KRT80	11.4984	3	14	3	487	54.142
Q8WWM7-3	Isoform 3 of Ataxin-2-like protein OS=Homo sapiens GN=ATXN2L	11.4801	4	10	4	1097	115.511
Q9NUQ3	Gamma-taxilin OS=Homo sapiens GN=TXLNG PE=1 SV=2	11.479	6	12	6	528	60.548
Q86Y37	CDK2-associated and cullin domain-containing protein 1 OS=Homo sapiens GN=CACUL1 PE=1 SV=1	11.4665	4	8	4	369	41.037
Q9BQA1	Methylosome protein 50 OS=Homo sapiens GN=WDR77 PE=1 SV=1	11.4659	4	26	4	342	36.701
Q70UQ0	Inhibitor of nuclear factor kappa-B kinase-interacting protein OS=Homo sapiens GN=IKBIP PE=1 SV=1	11.4555	4	12	2	350	39.285
Q9H0K1	Serine/threonine-protein kinase SIK2 OS=Homo sapiens GN=SIK2 PE=1 SV=1	11.4442	3	6	3	926	103.849
Q9BWU0	Kanadaptin OS=Homo sapiens GN=SLC4A1AP PE=1 SV=1	11.4323	4	7	4	796	88.759
Q13615	Myotubularin-related protein 3 OS=Homo sapiens GN=MTMR3 PE=1 SV=3	11.4133	3	10	2	1198	133.534
Q9BTU6	Phosphatidylinositol 4-kinase type 2-alpha OS=Homo sapiens GN=PI4K2A PE=1 SV=1	11.4126	4	10	4	479	53.989
Q9UKB1	F-box/WD repeat-containing protein 11 OS=Homo sapiens GN=FBXW11 PE=1 SV=1	11.3736	4	18	4	542	62.051
Q12849	G-rich sequence factor 1 OS=Homo sapiens GN=GRSF1 PE=1 SV=3	11.3665	4	11	4	480	53.093
Q15785	Mitochondrial import receptor subunit TOM34 OS=Homo sapiens GN=TOMM34 PE=1 SV=2	11.3608	2	6	2	309	34.538
O95684	FGFR1 oncogene partner OS=Homo sapiens GN=FGFR1OP PE=1 SV=1	11.3546	2	8	2	399	43.039
Q9NW13	RNA-binding protein 28 OS=Homo sapiens GN=RBM28 PE=1 SV=3	11.3507	2	6	2	759	85.685
Q6YP21	Kynurenine--oxoglutarate transaminase 3 OS=Homo sapiens GN=CCBL2 PE=1 SV=1	11.3403	3	10	3	454	51.368
Q8NBS9	Thioredoxin domain-containing protein 5 OS=Homo sapiens GN=TXNDC5 PE=1 SV=2	11.3314	4	12	4	432	47.599
Q14671-3	Isoform 3 of Pumilio homolog 1 OS=Homo sapiens GN=PUM1	11.3215	5	10	2	1188	126.607
Q2NL82	Pre-rRNA-processing protein TSR1 homolog OS=Homo sapiens GN=TSR1 PE=1 SV=1	11.3198	2	6	2	804	91.752
P13807	Glycogen [starch] synthase, muscle OS=Homo sapiens GN=GYS1 PE=1 SV=2	11.276	4	12	4	737	83.732
O15270	Serine palmitoyltransferase 2 OS=Homo sapiens GN=SPTLC2 PE=1 SV=1	11.2329	3	12	3	562	62.884
Q01105	Protein SET OS=Homo sapiens GN=SET PE=1 SV=3	11.2168	4	25	4	290	33.469
Q96GD4-5	Isoform 5 of Aurora kinase B OS=Homo sapiens GN=AURKB	11.2041	3	16	3	345	39.442
Q3YEC7-2	Isoform 2 of Rab-like protein 6 OS=Homo sapiens GN=RABL6	11.186	4	8	4	730	79.587
Q9NXH9	tRNA (guanine(26)-N(2))-dimethyltransferase OS=Homo sapiens GN=TRMT1 PE=1 SV=1	11.1586	3	6	3	659	72.188
Q99961	Endophilin-A2 OS=Homo sapiens GN=SH3GL1 PE=1 SV=1	11.1585	4	18	4	368	41.464
Q12765-2	Isoform 2 of Secernin-1 OS=Homo sapiens GN=SCRN1	11.1483	4	14	4	434	48.683
O95232	Luc7-like protein 3 OS=Homo sapiens GN=LUC7L3 PE=1 SV=2	11.1332	2	12	2	432	51.435
Q9H3Q1	Cdc42 effector protein 4 OS=Homo sapiens GN=CDC42EP4 PE=1 SV=1	11.1318	2	6	2	356	37.957
Q6YN16	Hydroxysteroid dehydrogenase-like protein 2 OS=Homo sapiens GN=HSDL2 PE=1 SV=1	11.12	4	14	4	418	45.366
Q99829	Copine-1 OS=Homo sapiens GN=CPNE1 PE=1 SV=1	11.1082	5	13	5	537	59.022
Q9H6U8-3	Isoform 3 of Alpha-1,2-mannosyltransferase ALG9 OS=Homo sapiens GN=ALG9	11.096	1	4	1	618	70.74
Q9Y5B6	PAX3- and PAX7-binding protein 1 OS=Homo sapiens GN=PAXBP1 PE=1 SV=2	11.0857	3	6	3	917	104.739
Q13616	Cullin-1 OS=Homo sapiens GN=CUL1 PE=1 SV=2	11.0759	3	12	3	776	89.622
O43505	Beta-1,4-glucuronyltransferase 1 OS=Homo sapiens GN=B4GAT1 PE=1 SV=1	11.0731	3	16	3	415	47.089
P51116	Fragile X mental retardation syndrome-related protein 2 OS=Homo sapiens GN=FXR2 PE=1 SV=2	11.0719	4	10	2	673	74.178
Q96S59	Ran-binding protein 9 OS=Homo sapiens GN=RANBP9 PE=1 SV=1	11.0592	3	8	3	729	77.798
P31153	S-adenosylmethionine synthase isoform type-2 OS=Homo sapiens GN=MAT2A PE=1 SV=1	11.0564	4	12	4	395	43.633
Q05193	Dynamin-1 OS=Homo sapiens GN=DNM1 PE=1 SV=2	11.0549	4	8	1	864	97.347
Q9NRR5	Ubiquilin-4 OS=Homo sapiens GN=UBQLN4 PE=1 SV=2	11.0351	3	6	2	601	63.812
P20810-6	Isoform 6 of Calpastatin OS=Homo sapiens GN=CAST	11.0227	3	11	3	791	84.891
P53041	Serine/threonine-protein phosphatase 5 OS=Homo sapiens GN=PPP5C PE=1 SV=1	11.0164	4	18	4	499	56.842
Q9NTK5	Obg-like ATPase 1 OS=Homo sapiens GN=OLA1 PE=1 SV=2	10.9802	4	20	4	396	44.715
Q7ZVF3	Succinate dehydrogenase [ubiquinone] flavoprotein subunit, mitochondrial OS=Danio rerio GN=sdha PE=2 SV=2	10.96	3	10	1	661	72.032
Q96RE7	Nucleus accumbens-associated protein 1 OS=Homo sapiens GN=NACC1 PE=1 SV=1	10.9409	4	8	4	527	57.222
Q96SZ6	CDK5 regulatory subunit-associated protein 1 OS=Homo sapiens GN=CDK5RAP1 PE=1 SV=2	10.9352	3	18	3	601	67.646
O94973-2	Isoform 2 of AP-2 complex subunit alpha-2 OS=Homo sapiens GN=AP2A2	10.9323	4	8	3	940	104.024
Q9Y5L0-1	Isoform 1 of Transportin-3 OS=Homo sapiens GN=TNPO3	10.9181	3	8	3	957	107.931
Q92667	A-kinase anchor protein 1, mitochondrial OS=Homo sapiens GN=AKAP1 PE=1 SV=1	10.9084	4	8	4	903	97.281
P15170-3	Isoform 3 of Eukaryotic peptide chain release factor GTP-binding subunit ERF3A OS=Homo sapiens GN=GSPT1	10.9061	5	14	5	637	68.656
Q6L8Q7	2',5'-phosphodiesterase 12 OS=Homo sapiens GN=PDE12 PE=1 SV=2	10.8939	4	10	4	609	67.309
Q99575	Ribonucleases P/MRP protein subunit POP1 OS=Homo sapiens GN=POP1 PE=1 SV=2	10.8838	2	6	2	1024	114.636
Q86V97	Kelch repeat and BTB domain-containing protein 6 OS=Homo sapiens GN=KBTBD6 PE=1 SV=1	10.8611	3	8	2	674	76.089
Q06265-2	Isoform 2 of Exosome complex component RRP45 OS=Homo sapiens GN=EXOSC9	10.8571	3	6	3	456	50.771
Q14694-2	Isoform 2 of Ubiquitin carboxyl-terminal hydrolase 10 OS=Homo sapiens GN=USP10	10.8535	4	8	4	846	92.54
Q99661	Kinesin-like protein KIF2C OS=Homo sapiens GN=KIF2C PE=1 SV=2	10.851	4	12	3	725	81.261
Q8N684-3	Isoform 3 of Cleavage and polyadenylation specificity factor subunit 7 OS=Homo sapiens GN=CPSF7	10.8426	5	14	5	514	56.341
O43488	Aflatoxin B1 aldehyde reductase member 2 OS=Homo sapiens GN=AKR7A2 PE=1 SV=3	10.8407	3	10	3	359	39.564
Q13724	Mannosyl-oligosaccharide glucosidase OS=Homo sapiens GN=MOGS PE=1 SV=5	10.8311	4	13	4	837	91.861
O94889	Kelch-like protein 18 OS=Homo sapiens GN=KLHL18 PE=1 SV=3	10.8195	3	8	3	574	63.597
Q9UKL0	REST corepressor 1 OS=Homo sapiens GN=RCOR1 PE=1 SV=1	10.8091	3	6	3	482	52.996
Q8WUF5	RelA-associated inhibitor OS=Homo sapiens GN=PPP1R13L PE=1 SV=4	10.8078	3	10	3	828	89.036
Q14444	Caprin-1 OS=Homo sapiens GN=CAPRIN1 PE=1 SV=2	10.8064	3	14	3	709	78.318
P61981	14-3-3 protein gamma OS=Homo sapiens GN=YWHAG PE=1 SV=2	10.8044	4	12	2	247	28.285
P55209	Nucleosome assembly protein 1-like 1 OS=Homo sapiens GN=NAP1L1 PE=1 SV=1	10.804	3	20	3	391	45.346
Q9H4B6	Protein salvador homolog 1 OS=Homo sapiens GN=SAV1 PE=1 SV=2	10.7895	3	14	3	383	44.606
Q05655-2	Isoform 2 of Protein kinase C delta type OS=Homo sapiens GN=PRKCD	10.7666	3	6	3	707	80.901
P33121	Long-chain-fatty-acid--CoA ligase 1 OS=Homo sapiens GN=ACSL1 PE=1 SV=1	10.7567	4	8	4	698	77.893
Q9NVV4	Poly(A) RNA polymerase, mitochondrial OS=Homo sapiens GN=MTPAP PE=1 SV=1	10.7296	4	16	4	582	66.13
P49674	Casein kinase I isoform epsilon OS=Homo sapiens GN=CSNK1E PE=1 SV=1	10.7245	4	20	3	416	47.285
Q6R327-3	Isoform 3 of Rapamycin-insensitive companion of mTOR OS=Homo sapiens GN=RICTOR	10.7179	3	6	3	1732	194.888
P14373	Zinc finger protein RFP OS=Homo sapiens GN=TRIM27 PE=1 SV=1	10.7143	2	18	2	513	58.452
O15400	Syntaxin-7 OS=Homo sapiens GN=STX7 PE=1 SV=4	10.6894	4	10	4	261	29.797
Q9BV20	Methylthioribose-1-phosphate isomerase OS=Homo sapiens GN=MRI1 PE=1 SV=1	10.6784	4	14	4	369	39.125
Q86XI2-2	Isoform 2 of Condensin-2 complex subunit G2 OS=Homo sapiens GN=NCAPG2	10.6732	5	14	5	1156	132.111
P23634	Plasma membrane calcium-transporting ATPase 4 OS=Homo sapiens GN=ATP2B4 PE=1 SV=2	10.6654	3	6	1	1241	137.833
Q16537	Serine/threonine-protein phosphatase 2A 56 kDa regulatory subunit epsilon isoform OS=Homo sapiens GN=PPP2R5E PE=1 SV=1	10.6546	3	6	3	467	54.664
P23368	NAD-dependent malic enzyme, mitochondrial OS=Homo sapiens GN=ME2 PE=1 SV=1	10.6498	3	10	3	584	65.402
Q9NZT2	Opioid growth factor receptor OS=Homo sapiens GN=OGFR PE=1 SV=3	10.6391	3	6	3	677	73.28
P84157	Matrix-remodeling-associated protein 7 OS=Homo sapiens GN=MXRA7 PE=1 SV=1	10.6304	3	8	3	204	21.452
P50148	Guanine nucleotide-binding protein G(q) subunit alpha OS=Homo sapiens GN=GNAQ PE=1 SV=4	10.6297	3	9	3	359	42.115
P28288	ATP-binding cassette sub-family D member 3 OS=Homo sapiens GN=ABCD3 PE=1 SV=1	10.6249	3	14	3	659	75.428
Q96IJ6-2	Isoform 2 of Mannose-1-phosphate guanyltransferase alpha OS=Homo sapiens GN=GMPPA	10.6161	3	8	3	473	51.985
Q9NWV8	BRISC and BRCA1-A complex member 1 OS=Homo sapiens GN=BABAM1 PE=1 SV=1	10.6091	2	8	2	329	36.537
P05165	Propionyl-CoA carboxylase alpha chain, mitochondrial OS=Homo sapiens GN=PCCA PE=1 SV=4	10.6027	4	8	4	728	80.008
Q92890-1	Isoform Long of Ubiquitin fusion degradation protein 1 homolog OS=Homo sapiens GN=UFD1L	10.5972	3	8	3	343	38.7
Q14320	Protein FAM50A OS=Homo sapiens GN=FAM50A PE=1 SV=2	10.5956	3	10	3	339	40.216
Q8WZA9	Immunity-related GTPase family Q protein OS=Homo sapiens GN=IRGQ PE=1 SV=1	10.5903	3	6	3	623	62.678
O75822	Eukaryotic translation initiation factor 3 subunit J OS=Homo sapiens GN=EIF3J PE=1 SV=2	10.5642	3	12	3	258	29.045
Q9NRG9	Aladin OS=Homo sapiens GN=AAAS PE=1 SV=1	10.5515	4	16	4	546	59.536
Q7L8L6	FAST kinase domain-containing protein 5, mitochondrial OS=Homo sapiens GN=FASTKD5 PE=1 SV=1	10.5439	4	8	4	764	86.519
Q9NP61	ADP-ribosylation factor GTPase-activating protein 3 OS=Homo sapiens GN=ARFGAP3 PE=1 SV=1	10.5284	4	10	4	516	56.893
Q96JJ7	Protein disulfide-isomerase TMX3 OS=Homo sapiens GN=TMX3 PE=1 SV=2	10.514	4	14	4	454	51.839
Q9Y2J2-2	Isoform 2 of Band 4.1-like protein 3 OS=Homo sapiens GN=EPB41L3	10.4874	3	6	3	865	96.454
Q10471	Polypeptide N-acetylgalactosaminyltransferase 2 OS=Homo sapiens GN=GALNT2 PE=1 SV=1	10.4869	3	10	3	571	64.691
P07099	Epoxide hydrolase 1 OS=Homo sapiens GN=EPHX1 PE=1 SV=1	10.4781	6	25	6	455	52.915
Q8IY81	pre-rRNA processing protein FTSJ3 OS=Homo sapiens GN=FTSJ3 PE=1 SV=2	10.4738	4	10	4	847	96.499
Q14181	DNA polymerase alpha subunit B OS=Homo sapiens GN=POLA2 PE=1 SV=2	10.456	4	8	4	598	65.906
P08754	Guanine nucleotide-binding protein G(k) subunit alpha OS=Homo sapiens GN=GNAI3 PE=1 SV=3	10.4535	3	10	2	354	40.506
Q8NF37	Lysophosphatidylcholine acyltransferase 1 OS=Homo sapiens GN=LPCAT1 PE=1 SV=2	10.4491	3	10	3	534	59.113
Q86Y46	Keratin, type II cytoskeletal 73 OS=Homo sapiens GN=KRT73 PE=1 SV=1	10.4474	4	95	1	540	58.887
P53365	Arfaptin-2 OS=Homo sapiens GN=ARFIP2 PE=1 SV=1	10.43	3	16	3	341	37.832
Q8NCA5	Protein FAM98A OS=Homo sapiens GN=FAM98A PE=1 SV=1	10.4117	2	8	2	519	55.366
Q8N5F7	NF-kappa-B-activating protein OS=Homo sapiens GN=NKAP PE=1 SV=1	10.3662	3	12	3	415	47.11
O43765	Small glutamine-rich tetratricopeptide repeat-containing protein alpha OS=Homo sapiens GN=SGTA PE=1 SV=1	10.3436	3	17	3	313	34.042
Q15813-2	Isoform 2 of Tubulin-specific chaperone E OS=Homo sapiens GN=TBCE	10.338	4	14	4	578	64.811
Q9NQ48	Leucine zipper transcription factor-like protein 1 OS=Homo sapiens GN=LZTFL1 PE=1 SV=1	10.3355	4	11	4	299	34.571
Q9H0U9	Testis-specific Y-encoded-like protein 1 OS=Homo sapiens GN=TSPYL1 PE=1 SV=3	10.3134	3	11	3	437	49.162
Q16658	Fascin OS=Homo sapiens GN=FSCN1 PE=1 SV=3	10.301	3	8	3	493	54.496
Q0VDF9	Heat shock 70 kDa protein 14 OS=Homo sapiens GN=HSPA14 PE=1 SV=1	10.3007	5	16	5	509	54.76
Q8IXI1	Mitochondrial Rho GTPase 2 OS=Homo sapiens GN=RHOT2 PE=1 SV=2	10.3002	3	6	3	618	68.075
Q3LXA3	Triokinase/FMN cyclase OS=Homo sapiens GN=TKFC PE=1 SV=2	10.2985	3	10	3	575	58.91
O14979	Heterogeneous nuclear ribonucleoprotein D-like OS=Homo sapiens GN=HNRNPDL PE=1 SV=3	10.283	3	12	2	420	46.409
Q15032-3	Isoform 3 of R3H domain-containing protein 1 OS=Homo sapiens GN=R3HDM1	10.2753	3	8	3	1100	120.749
P43490	Nicotinamide phosphoribosyltransferase OS=Homo sapiens GN=NAMPT PE=1 SV=1	10.2532	4	22	4	491	55.487
P07339	Cathepsin D OS=Homo sapiens GN=CTSD PE=1 SV=1	10.252	2	8	2	412	44.524
Q9UPN4	Centrosomal protein of 131 kDa OS=Homo sapiens GN=CEP131 PE=1 SV=3	10.2518	2	4	2	1083	122.075
Q12986	Transcriptional repressor NF-X1 OS=Homo sapiens GN=NFX1 PE=1 SV=2	10.251	2	6	2	1120	124.312
Q13838-2	Isoform 2 of Spliceosome RNA helicase DDX39B OS=Homo sapiens GN=DDX39B	10.2339	4	18	4	443	50.647
Q9NYA4	Myotubularin-related protein 4 OS=Homo sapiens GN=MTMR4 PE=1 SV=2	10.2333	3	6	2	1195	133.268
Q9UKG1	DCC-interacting protein 13-alpha OS=Homo sapiens GN=APPL1 PE=1 SV=1	10.222	3	8	3	709	79.614
Q9NYU2	UDP-glucose:glycoprotein glucosyltransferase 1 OS=Homo sapiens GN=UGGT1 PE=1 SV=3	10.2164	3	6	3	1555	177.078
Q06830	Peroxiredoxin-1 OS=Homo sapiens GN=PRDX1 PE=1 SV=1	10.2162	4	23	3	199	22.096
Q9H9P8	L-2-hydroxyglutarate dehydrogenase, mitochondrial OS=Homo sapiens GN=L2HGDH PE=1 SV=3	10.2133	4	10	4	463	50.284
Q13586	Stromal interaction molecule 1 OS=Homo sapiens GN=STIM1 PE=1 SV=3	10.2058	2	10	2	685	77.375
A0FGR8-6	Isoform 6 of Extended synaptotagmin-2 OS=Homo sapiens GN=ESYT2	10.1861	4	8	4	942	104.643
Q8N2G8	GH3 domain-containing protein OS=Homo sapiens GN=GHDC PE=1 SV=2	10.1572	3	6	3	530	57.487
O15350	Tumor protein p73 OS=Homo sapiens GN=TP73 PE=1 SV=1	10.1334	3	6	3	636	69.579
P15104	Glutamine synthetase OS=Homo sapiens GN=GLUL PE=1 SV=4	10.1255	4	10	4	373	42.037
Q9UP83-2	Isoform 2 of Conserved oligomeric Golgi complex subunit 5 OS=Homo sapiens GN=COG5	10.1187	4	8	4	860	94.842
Q9HC07	Transmembrane protein 165 OS=Homo sapiens GN=TMEM165 PE=1 SV=1	10.0965	3	5	3	324	34.883
Q9C037	E3 ubiquitin-protein ligase TRIM4 OS=Homo sapiens GN=TRIM4 PE=1 SV=2	10.0962	3	10	3	500	57.424
Q9UJA5	tRNA (adenine(58)-N(1))-methyltransferase non-catalytic subunit TRM6 OS=Homo sapiens GN=TRMT6 PE=1 SV=1	10.0954	3	8	3	497	55.764
Q9H0D6	5'-3' exoribonuclease 2 OS=Homo sapiens GN=XRN2 PE=1 SV=1	10.0922	3	6	3	950	108.513
Q6P5Z2	Serine/threonine-protein kinase N3 OS=Homo sapiens GN=PKN3 PE=1 SV=1	10.0796	4	8	3	889	99.358
Q14166	Tubulin--tyrosine ligase-like protein 12 OS=Homo sapiens GN=TTLL12 PE=1 SV=2	10.0781	4	8	4	644	74.356
Q99733-2	Isoform 2 of Nucleosome assembly protein 1-like 4 OS=Homo sapiens GN=NAP1L4	10.0343	2	14	2	386	44.051
Q32P28-3	Isoform 3 of Prolyl 3-hydroxylase 1 OS=Homo sapiens GN=P3H1	10.0269	5	10	5	804	90.559
Q15437	Protein transport protein Sec23B OS=Homo sapiens GN=SEC23B PE=1 SV=2	10.0108	3	8	2	767	86.424
P54646	5'-AMP-activated protein kinase catalytic subunit alpha-2 OS=Homo sapiens GN=PRKAA2 PE=1 SV=2	9.98151	2	8	2	552	62.28
Q8ND56	Protein LSM14 homolog A OS=Homo sapiens GN=LSM14A PE=1 SV=3	9.97731	3	16	3	463	50.499
O43303	Centriolar coiled-coil protein of 110 kDa OS=Homo sapiens GN=CCP110 PE=1 SV=3	9.96086	3	8	3	1012	113.353
Q9UNS2	COP9 signalosome complex subunit 3 OS=Homo sapiens GN=COPS3 PE=1 SV=3	9.95173	3	10	3	423	47.842
Q13555-6	Isoform 6 of Calcium/calmodulin-dependent protein kinase type II subunit gamma OS=Homo sapiens GN=CAMK2G	9.9514	3	8	3	588	65.201
O43148-2	Isoform 2 of mRNA cap guanine-N7 methyltransferase OS=Homo sapiens GN=RNMT	9.94561	5	12	5	504	57.688
Q8ND24	RING finger protein 214 OS=Homo sapiens GN=RNF214 PE=1 SV=2	9.94155	2	6	2	703	77.619
Q86W92	Liprin-beta-1 OS=Homo sapiens GN=PPFIBP1 PE=1 SV=2	9.93046	2	8	2	1011	113.952
Q9NNW5	WD repeat-containing protein 6 OS=Homo sapiens GN=WDR6 PE=1 SV=1	9.91602	5	14	5	1121	121.647
P38432	Coilin OS=Homo sapiens GN=COIL PE=1 SV=1	9.90804	3	6	3	576	62.57
P12236	ADP/ATP translocase 3 OS=Homo sapiens GN=SLC25A6 PE=1 SV=4	9.90764	5	21	2	298	32.845
P56546-2	Isoform 2 of C-terminal-binding protein 2 OS=Mus musculus GN=Ctbp2	9.90055	4	16	2	988	107.06
Q15750	TGF-beta-activated kinase 1 and MAP3K7-binding protein 1 OS=Homo sapiens GN=TAB1 PE=1 SV=1	9.87515	3	8	3	504	54.61
Q9Y2W6	Tudor and KH domain-containing protein OS=Homo sapiens GN=TDRKH PE=1 SV=2	9.86971	3	6	3	561	62.007
P49770	Translation initiation factor eIF-2B subunit beta OS=Homo sapiens GN=EIF2B2 PE=1 SV=3	9.85275	2	8	2	351	38.965
Q9NYB9	Abl interactor 2 OS=Homo sapiens GN=ABI2 PE=1 SV=1	9.83886	3	8	1	513	55.629
P63151-2	Isoform 2 of Serine/threonine-protein phosphatase 2A 55 kDa regulatory subunit B alpha isoform OS=Homo sapiens GN=PPP2R2A	9.83581	4	16	4	457	52.966
Q92542	Nicastrin OS=Homo sapiens GN=NCSTN PE=1 SV=2	9.82501	4	8	4	709	78.362
Q9H871	Protein RMD5 homolog A OS=Homo sapiens GN=RMND5A PE=1 SV=1	9.81655	3	8	3	391	43.964
Q9ULV4-3	Isoform 3 of Coronin-1C OS=Homo sapiens GN=CORO1C	9.81473	3	10	3	527	58.91
P45954	Short/branched chain specific acyl-CoA dehydrogenase, mitochondrial OS=Homo sapiens GN=ACADSB PE=1 SV=1	9.81349	4	10	4	432	47.455
Q6BDS2	UHRF1-binding protein 1 OS=Homo sapiens GN=UHRF1BP1 PE=1 SV=1	9.8134	2	4	2	1440	159.385
Q14139-2	Isoform 2 of Ubiquitin conjugation factor E4 A OS=Homo sapiens GN=UBE4A	9.81279	3	8	3	1073	123.442
Q5VUJ6	Leucine-rich repeat and calponin homology domain-containing protein 2 OS=Homo sapiens GN=LRCH2 PE=2 SV=2	9.81113	3	8	3	765	84.536
Q9NVX2	Notchless protein homolog 1 OS=Homo sapiens GN=NLE1 PE=1 SV=4	9.80551	3	12	3	485	53.287
Q9NPF4	Probable tRNA N6-adenosine threonylcarbamoyltransferase OS=Homo sapiens GN=OSGEP PE=1 SV=1	9.80081	3	8	3	335	36.403
Q6ZNB6	NF-X1-type zinc finger protein NFXL1 OS=Homo sapiens GN=NFXL1 PE=1 SV=2	9.79642	2	6	2	911	101.27
Q9H4H8	Protein FAM83D OS=Homo sapiens GN=FAM83D PE=1 SV=3	9.77182	3	8	3	585	64.384
Q9UHR6	Zinc finger HIT domain-containing protein 2 OS=Homo sapiens GN=ZNHIT2 PE=1 SV=1	9.76291	3	8	3	403	42.857
Q96RP9-2	Isoform 2 of Elongation factor G, mitochondrial OS=Homo sapiens GN=GFM1	9.76213	5	10	5	770	85.815
O14964	Hepatocyte growth factor-regulated tyrosine kinase substrate OS=Homo sapiens GN=HGS PE=1 SV=1	9.72708	3	8	3	777	86.138
Q9BPU6	Dihydropyrimidinase-related protein 5 OS=Homo sapiens GN=DPYSL5 PE=1 SV=1	9.72158	4	10	4	564	61.382
Q9NXR1	Nuclear distribution protein nudE homolog 1 OS=Homo sapiens GN=NDE1 PE=1 SV=2	9.70841	4	11	4	346	38.785
A0MZ66-3	Isoform 3 of Shootin-1 OS=Homo sapiens GN=SHTN1	9.70558	2	6	2	649	73.564
Q16134	Electron transfer flavoprotein-ubiquinone oxidoreductase, mitochondrial OS=Homo sapiens GN=ETFDH PE=1 SV=2	9.7011	4	14	4	617	68.452
Q96J01	THO complex subunit 3 OS=Homo sapiens GN=THOC3 PE=1 SV=1	9.69324	5	16	5	351	38.747
O15062	Zinc finger and BTB domain-containing protein 5 OS=Homo sapiens GN=ZBTB5 PE=1 SV=1	9.6859	2	4	2	677	74.231
O00505	Importin subunit alpha-4 OS=Homo sapiens GN=KPNA3 PE=1 SV=2	9.68544	3	18	3	521	57.775
P61421	V-type proton ATPase subunit d 1 OS=Homo sapiens GN=ATP6V0D1 PE=1 SV=1	9.67131	5	13	5	351	40.303
Q53EZ4	Centrosomal protein of 55 kDa OS=Homo sapiens GN=CEP55 PE=1 SV=3	9.66865	3	8	3	464	54.145
Q9UH99-2	Isoform 2 of SUN domain-containing protein 2 OS=Homo sapiens GN=SUN2	9.65786	3	8	3	738	82.452
P05423	DNA-directed RNA polymerase III subunit RPC4 OS=Homo sapiens GN=POLR3D PE=1 SV=2	9.63988	2	4	2	398	44.368
Q5GSE1	Chaperone protein DnaK OS=Wolbachia sp. subsp. Brugia malayi (strain TRS) GN=dnaK PE=3 SV=1	9.63074	3	17	2	635	68.895
O00469-2	Isoform 2 of Procollagen-lysine,2-oxoglutarate 5-dioxygenase 2 OS=Homo sapiens GN=PLOD2	9.62934	2	4	2	758	87.043
Q8TCJ2	Dolichyl-diphosphooligosaccharide--protein glycosyltransferase subunit STT3B OS=Homo sapiens GN=STT3B PE=1 SV=1	9.61778	4	15	4	826	93.614
O00567	Nucleolar protein 56 OS=Homo sapiens GN=NOP56 PE=1 SV=4	9.61354	4	8	4	594	66.009
Q9Y2T2	AP-3 complex subunit mu-1 OS=Homo sapiens GN=AP3M1 PE=1 SV=1	9.59943	3	10	3	418	46.909
O43747-2	Isoform 2 of AP-1 complex subunit gamma-1 OS=Homo sapiens GN=AP1G1	9.57555	4	8	4	825	91.664
Q9GZR7	ATP-dependent RNA helicase DDX24 OS=Homo sapiens GN=DDX24 PE=1 SV=1	9.56855	3	6	3	859	96.271
Q8IYQ7	Threonine synthase-like 1 OS=Homo sapiens GN=THNSL1 PE=1 SV=2	9.55858	2	6	2	743	83.017
Q6PML9	Zinc transporter 9 OS=Homo sapiens GN=SLC30A9 PE=1 SV=1	9.5573	4	10	4	568	63.475
Q8TEX9-2	Isoform 2 of Importin-4 OS=Homo sapiens GN=IPO4	9.55632	4	8	4	1083	118.826
P98172	Ephrin-B1 OS=Homo sapiens GN=EFNB1 PE=1 SV=1	9.55198	2	6	2	346	37.982
Q16643-3	Isoform 3 of Drebrin OS=Homo sapiens GN=DBN1	9.52791	2	4	2	695	76.253
P20839-6	Isoform 6 of Inosine-5'-monophosphate dehydrogenase 1 OS=Homo sapiens GN=IMPDH1	9.52416	4	20	3	599	64.279
P86790	Vacuolar fusion protein CCZ1 homolog B OS=Homo sapiens GN=CCZ1B PE=1 SV=1	9.51568	3	8	3	482	55.83
Q14558-2	Isoform 2 of Phosphoribosyl pyrophosphate synthase-associated protein 1 OS=Homo sapiens GN=PRPSAP1	9.49554	4	12	3	385	42.44
Q6PGB8-2	Isoform 2 of Probable global transcription activator SNF2L1 OS=Mus musculus GN=Smarca1	9.49495	4	8	4	1062	123.387
P40121	Macrophage-capping protein OS=Homo sapiens GN=CAPG PE=1 SV=2	9.49386	3	8	3	348	38.474
Q8NFG4	Folliculin OS=Homo sapiens GN=FLCN PE=1 SV=1	9.46673	3	6	3	579	64.432
Q14739	Lamin-B receptor OS=Homo sapiens GN=LBR PE=1 SV=2	9.46323	4	20	4	615	70.658
Q13363	C-terminal-binding protein 1 OS=Homo sapiens GN=CTBP1 PE=1 SV=2	9.43563	4	18	2	440	47.505
Q9H9Y6-3	Isoform 3 of DNA-directed RNA polymerase I subunit RPA2 OS=Homo sapiens GN=POLR1B	9.43546	4	8	4	1173	132.154
P17697	Clusterin OS=Bos taurus GN=CLU PE=1 SV=1	9.42493	3	8	3	439	51.081
Q9UPP1	Histone lysine demethylase PHF8 OS=Homo sapiens GN=PHF8 PE=1 SV=3	9.4206	3	6	3	1060	117.79
Q9BXK5	Bcl-2-like protein 13 OS=Homo sapiens GN=BCL2L13 PE=1 SV=1	9.41135	3	7	3	485	52.691
Q9BW27	Nuclear pore complex protein Nup85 OS=Homo sapiens GN=NUP85 PE=1 SV=1	9.40799	4	8	4	656	74.971
Q96RU2	Ubiquitin carboxyl-terminal hydrolase 28 OS=Homo sapiens GN=USP28 PE=1 SV=1	9.40791	3	6	3	1077	122.414
Q8NEL9	Phospholipase DDHD1 OS=Homo sapiens GN=DDHD1 PE=1 SV=2	9.40285	2	4	2	900	100.372
Q8IZ69	tRNA (uracil-5-)-methyltransferase homolog A OS=Homo sapiens GN=TRMT2A PE=1 SV=2	9.39547	3	6	3	625	68.682
P29144	Tripeptidyl-peptidase 2 OS=Homo sapiens GN=TPP2 PE=1 SV=4	9.3776	3	6	3	1249	138.263
P53985	Monocarboxylate transporter 1 OS=Homo sapiens GN=SLC16A1 PE=1 SV=3	9.36257	3	6	3	500	53.909
Q9UL63	Muskelin OS=Homo sapiens GN=MKLN1 PE=1 SV=2	9.35385	5	10	5	735	84.713
Q9UPQ3	Arf-GAP with GTPase, ANK repeat and PH domain-containing protein 1 OS=Homo sapiens GN=AGAP1 PE=1 SV=4	9.34089	3	8	1	857	94.411
Q8IUD2	ELKS/Rab6-interacting/CAST family member 1 OS=Homo sapiens GN=ERC1 PE=1 SV=1	9.33637	3	6	3	1116	128.008
Q9UHY1	Nuclear receptor-binding protein OS=Homo sapiens GN=NRBP1 PE=1 SV=1	9.33588	2	4	2	535	59.807
Q9Y606	tRNA pseudouridine synthase A, mitochondrial OS=Homo sapiens GN=PUS1 PE=1 SV=3	9.32117	3	10	3	427	47.44
Q5C9Z4	Nucleolar MIF4G domain-containing protein 1 OS=Homo sapiens GN=NOM1 PE=1 SV=1	9.31076	3	6	3	860	96.198
Q9BX67	Junctional adhesion molecule C OS=Homo sapiens GN=JAM3 PE=1 SV=1	9.29632	2	4	2	310	34.998
Q9BTE6-3	Isoform 3 of Alanyl-tRNA editing protein Aarsd1 OS=Homo sapiens GN=AARSD1	9.29041	3	8	3	586	65.66
Q96F86	Enhancer of mRNA-decapping protein 3 OS=Homo sapiens GN=EDC3 PE=1 SV=1	9.28604	3	10	3	508	56.042
Q14CX7	N-alpha-acetyltransferase 25, NatB auxiliary subunit OS=Homo sapiens GN=NAA25 PE=1 SV=1	9.25537	4	8	4	972	112.221
Q6PJG6	BRCA1-associated ATM activator 1 OS=Homo sapiens GN=BRAT1 PE=1 SV=2	9.24319	3	6	3	821	88.063
Q5MIZ7	Serine/threonine-protein phosphatase 4 regulatory subunit 3B OS=Homo sapiens GN=PPP4R3B PE=1 SV=2	9.23861	3	6	2	849	97.397
Q96T76-8	Isoform 5 of MMS19 nucleotide excision repair protein homolog OS=Homo sapiens GN=MMS19	9.23428	4	8	4	1051	115.631
Q9H2Y7	Zinc finger protein 106 OS=Homo sapiens GN=ZNF106 PE=1 SV=1	9.23415	2	6	2	1883	208.754
Q9UID3	Vacuolar protein sorting-associated protein 51 homolog OS=Homo sapiens GN=VPS51 PE=1 SV=2	9.23034	2	6	2	782	85.988
Q9Y312	Protein AAR2 homolog OS=Homo sapiens GN=AAR2 PE=1 SV=2	9.21651	2	10	2	384	43.444
Q9UJX3	Anaphase-promoting complex subunit 7 OS=Homo sapiens GN=ANAPC7 PE=1 SV=4	9.1894	4	10	4	599	66.813
P85299-5	Isoform 5 of Proline-rich protein 5 OS=Homo sapiens GN=PRR5	9.18475	2	8	2	411	45.144
Q9HB07	UPF0160 protein MYG1, mitochondrial OS=Homo sapiens GN=C12orf10 PE=1 SV=2	9.17894	4	10	4	376	42.422
Q9P0U3	Sentrin-specific protease 1 OS=Homo sapiens GN=SENP1 PE=1 SV=2	9.17632	3	6	3	644	73.435
O95674	Phosphatidate cytidylyltransferase 2 OS=Homo sapiens GN=CDS2 PE=1 SV=1	9.17338	3	16	3	445	51.384
P61764-2	Isoform 2 of Syntaxin-binding protein 1 OS=Homo sapiens GN=STXBP1	9.15161	3	7	3	603	68.692
Q6P3X3	Tetratricopeptide repeat protein 27 OS=Homo sapiens GN=TTC27 PE=1 SV=1	9.14275	4	8	4	843	96.571
Q6P6C2	RNA demethylase ALKBH5 OS=Homo sapiens GN=ALKBH5 PE=1 SV=2	9.13551	3	8	3	394	44.229
O94919	Endonuclease domain-containing 1 protein OS=Homo sapiens GN=ENDOD1 PE=1 SV=2	9.13427	3	8	3	500	54.981
Q9HC36	rRNA methyltransferase 3, mitochondrial OS=Homo sapiens GN=RNMTL1 PE=1 SV=2	9.13196	3	12	3	420	46.99
P43243	Matrin-3 OS=Homo sapiens GN=MATR3 PE=1 SV=2	9.12901	5	10	5	847	94.565
Q8ND04-2	Isoform 2 of Protein SMG8 OS=Homo sapiens GN=SMG8	9.12073	1	2	1	1023	113.259
Q9NRL3-3	Isoform 3 of Striatin-4 OS=Homo sapiens GN=STRN4	9.11238	3	8	3	760	81.215
Q8CE90	Dual specificity mitogen-activated protein kinase kinase 7 OS=Mus musculus GN=Map2k7 PE=1 SV=1	9.10863	3	16	3	535	59.274
P48739-3	Isoform 3 of Phosphatidylinositol transfer protein beta isoform OS=Homo sapiens GN=PITPNB	9.09669	3	7	3	273	31.68
Q14008-3	Isoform 3 of Cytoskeleton-associated protein 5 OS=Homo sapiens GN=CKAP5	9.09495	3	10	3	2039	226.114
Q9NWK9	Box C/D snoRNA protein 1 OS=Homo sapiens GN=ZNHIT6 PE=1 SV=1	9.07284	3	8	3	470	53.884
O95551-2	Isoform 2 of Tyrosyl-DNA phosphodiesterase 2 OS=Homo sapiens GN=TDP2	9.06711	2	10	2	392	44.31
O60934	Nibrin OS=Homo sapiens GN=NBN PE=1 SV=1	9.05379	3	8	3	754	84.906
Q96G46	tRNA-dihydrouridine(47) synthase [NAD(P)(+)]-like OS=Homo sapiens GN=DUS3L PE=1 SV=2	9.02945	3	6	3	650	72.548
O94763	Unconventional prefoldin RPB5 interactor 1 OS=Homo sapiens GN=URI1 PE=1 SV=3	9.02867	3	6	3	535	59.796
Q9NRA8-3	Isoform 3 of Eukaryotic translation initiation factor 4E transporter OS=Homo sapiens GN=EIF4ENIF1	9.02536	3	6	3	986	108.262
Q2KJF1	Alpha-1B-glycoprotein OS=Bos taurus GN=A1BG PE=1 SV=1	9.01504	2	4	2	503	53.52
Q96I24	Far upstream element-binding protein 3 OS=Homo sapiens GN=FUBP3 PE=1 SV=2	9.00772	4	12	2	572	61.602
Q9NQW7-3	Isoform 3 of Xaa-Pro aminopeptidase 1 OS=Homo sapiens GN=XPNPEP1	8.99819	3	6	3	666	74.751
Q9BZH6	WD repeat-containing protein 11 OS=Homo sapiens GN=WDR11 PE=1 SV=1	8.99648	4	8	4	1224	136.598
P49790-3	Isoform 3 of Nuclear pore complex protein Nup153 OS=Homo sapiens GN=NUP153	8.99551	2	4	2	1506	157.24
Q96C23	Aldose 1-epimerase OS=Homo sapiens GN=GALM PE=1 SV=1	8.99013	2	8	2	342	37.742
Q9BY67-3	Isoform 3 of Cell adhesion molecule 1 OS=Homo sapiens GN=CADM1	8.97266	2	6	2	471	51.501
P83436	Conserved oligomeric Golgi complex subunit 7 OS=Homo sapiens GN=COG7 PE=1 SV=1	8.96481	3	6	3	770	86.289
O60941	Dystrobrevin beta OS=Homo sapiens GN=DTNB PE=1 SV=1	8.93566	4	12	1	627	71.31
Q6DD88	Atlastin-3 OS=Homo sapiens GN=ATL3 PE=1 SV=1	8.93347	1	6	1	541	60.503
P19823	Inter-alpha-trypsin inhibitor heavy chain H2 OS=Homo sapiens GN=ITIH2 PE=1 SV=2	8.92334	3	8	3	946	106.397
Q9NUQ7	Ufm1-specific protease 2 OS=Homo sapiens GN=UFSP2 PE=1 SV=3	8.91811	2	6	2	469	53.227
Q9NVH2	Integrator complex subunit 7 OS=Homo sapiens GN=INTS7 PE=1 SV=1	8.90422	3	5	3	962	106.766
Q5T6V5	UPF0553 protein C9orf64 OS=Homo sapiens GN=C9orf64 PE=1 SV=1	8.90113	2	9	2	341	39.004
Q08752	Peptidyl-prolyl cis-trans isomerase D OS=Homo sapiens GN=PPID PE=1 SV=3	8.89722	5	10	5	370	40.738
Q9BRP4	Proteasomal ATPase-associated factor 1 OS=Homo sapiens GN=PAAF1 PE=1 SV=2	8.89539	3	12	3	392	42.163
Q9UDY2-7	Isoform 7 of Tight junction protein ZO-2 OS=Homo sapiens GN=TJP2	8.89337	3	6	3	1221	137.258
Q14847-2	Isoform 2 of LIM and SH3 domain protein 1 OS=Homo sapiens GN=LASP1	8.87871	3	10	3	323	35.991
Q969N2	GPI transamidase component PIG-T OS=Homo sapiens GN=PIGT PE=1 SV=1	8.85177	5	9	5	578	65.658
P49585	Choline-phosphate cytidylyltransferase A OS=Homo sapiens GN=PCYT1A PE=1 SV=2	8.82572	3	8	3	367	41.705
Q9Y6Y8	SEC23-interacting protein OS=Homo sapiens GN=SEC23IP PE=1 SV=1	8.81032	4	10	4	1000	111.007
Q96KG9	N-terminal kinase-like protein OS=Homo sapiens GN=SCYL1 PE=1 SV=1	8.80721	3	8	3	808	89.575
P00390	Glutathione reductase, mitochondrial OS=Homo sapiens GN=GSR PE=1 SV=2	8.80154	3	12	3	522	56.221
A5A6M3	RNA-binding motif protein, X chromosome OS=Pan troglodytes GN=RBMX PE=2 SV=1	8.78953	3	8	3	391	42.306
Q9BTY7	Protein HGH1 homolog OS=Homo sapiens GN=HGH1 PE=1 SV=1	8.77903	4	14	4	390	42.103
Q9Y4R8	Telomere length regulation protein TEL2 homolog OS=Homo sapiens GN=TELO2 PE=1 SV=2	8.76641	3	6	3	837	91.689
Q8N3R9	MAGUK p55 subfamily member 5 OS=Homo sapiens GN=MPP5 PE=1 SV=3	8.75856	3	8	3	675	77.246
Q9GZZ9	Ubiquitin-like modifier-activating enzyme 5 OS=Homo sapiens GN=UBA5 PE=1 SV=1	8.73262	2	10	2	404	44.834
Q96CS3	FAS-associated factor 2 OS=Homo sapiens GN=FAF2 PE=1 SV=2	8.72435	3	14	3	445	52.591
P11498	Pyruvate carboxylase, mitochondrial OS=Homo sapiens GN=PC PE=1 SV=2	8.71835	2	4	2	1178	129.551
P04899-4	Isoform sGi2 of Guanine nucleotide-binding protein G(i) subunit alpha-2 OS=Homo sapiens GN=GNAI2	8.70638	2	14	1	366	41.522
P25054	Adenomatous polyposis coli protein OS=Homo sapiens GN=APC PE=1 SV=2	8.70538	2	6	2	2843	311.455
Q9H8V3-3	Isoform 3 of Protein ECT2 OS=Homo sapiens GN=ECT2	8.69304	4	8	4	958	108.461
Q9BVA0	Katanin p80 WD40 repeat-containing subunit B1 OS=Homo sapiens GN=KATNB1 PE=1 SV=1	8.67423	2	4	2	655	72.288
P10398	Serine/threonine-protein kinase A-Raf OS=Homo sapiens GN=ARAF PE=1 SV=2	8.6735	3	8	2	606	67.542
Q9Y450	HBS1-like protein OS=Homo sapiens GN=HBS1L PE=1 SV=1	8.66621	4	8	4	684	75.426
Q9C0B7	Transport and Golgi organization protein 6 homolog OS=Homo sapiens GN=TANGO6 PE=1 SV=2	8.65862	3	6	3	1094	120.671
Q9UHR5	SAP30-binding protein OS=Homo sapiens GN=SAP30BP PE=1 SV=1	8.64593	2	4	2	308	33.85
Q13243	Serine/arginine-rich splicing factor 5 OS=Homo sapiens GN=SRSF5 PE=1 SV=1	8.63422	3	19	2	272	31.245
Q13573	SNW domain-containing protein 1 OS=Homo sapiens GN=SNW1 PE=1 SV=1	8.61066	3	6	3	536	61.456
Q5VSL9	Striatin-interacting protein 1 OS=Homo sapiens GN=STRIP1 PE=1 SV=1	8.60463	3	8	3	837	95.515
Q8WUX9	Charged multivesicular body protein 7 OS=Homo sapiens GN=CHMP7 PE=1 SV=1	8.60335	2	6	2	453	50.879
Q96RS6	NudC domain-containing protein 1 OS=Homo sapiens GN=NUDCD1 PE=1 SV=2	8.59488	3	13	3	583	66.713
Q07666	KH domain-containing, RNA-binding, signal transduction-associated protein 1 OS=Homo sapiens GN=KHDRBS1 PE=1 SV=1	8.58412	3	6	3	443	48.197
O60563	Cyclin-T1 OS=Homo sapiens GN=CCNT1 PE=1 SV=1	8.56719	4	8	4	726	80.634
O43493	Trans-Golgi network integral membrane protein 2 OS=Homo sapiens GN=TGOLN2 PE=1 SV=2	8.56276	2	6	2	480	51.082
Q96FW1	Ubiquitin thioesterase OTUB1 OS=Homo sapiens GN=OTUB1 PE=1 SV=2	8.56065	4	8	4	271	31.264
P04049-2	Isoform 2 of RAF proto-oncogene serine/threonine-protein kinase OS=Homo sapiens GN=RAF1	8.55529	3	8	2	668	75.347
Q8IZ07	Ankyrin repeat domain-containing protein 13A OS=Homo sapiens GN=ANKRD13A PE=1 SV=3	8.5515	2	8	2	590	67.577
O75312	Zinc finger protein ZPR1 OS=Homo sapiens GN=ZPR1 PE=1 SV=1	8.53017	2	8	2	459	50.893
Q9NR46-2	Isoform 2 of Endophilin-B2 OS=Homo sapiens GN=SH3GLB2	8.52806	3	10	3	404	44.738
Q15758	Neutral amino acid transporter B(0) OS=Homo sapiens GN=SLC1A5 PE=1 SV=2	8.5252	3	8	3	541	56.562
Q9UEW8	STE20/SPS1-related proline-alanine-rich protein kinase OS=Homo sapiens GN=STK39 PE=1 SV=3	8.51957	2	6	1	545	59.436
Q8NFW8	N-acylneuraminate cytidylyltransferase OS=Homo sapiens GN=CMAS PE=1 SV=2	8.49645	2	7	2	434	48.349
Q71RC2-4	Isoform 4 of La-related protein 4 OS=Homo sapiens GN=LARP4	8.49257	3	6	3	730	81.193
Q5QP82	DDB1- and CUL4-associated factor 10 OS=Homo sapiens GN=DCAF10 PE=1 SV=1	8.4909	2	8	2	559	60.544
O43395	U4/U6 small nuclear ribonucleoprotein Prp3 OS=Homo sapiens GN=PRPF3 PE=1 SV=2	8.49025	4	8	4	683	77.481
Q15904	V-type proton ATPase subunit S1 OS=Homo sapiens GN=ATP6AP1 PE=1 SV=2	8.47871	4	9	4	470	51.993
P56181-2	Isoform 2 of NADH dehydrogenase [ubiquinone] flavoprotein 3, mitochondrial OS=Homo sapiens GN=NDUFV3	8.47785	3	6	3	473	50.953
Q15717-2	Isoform 2 of ELAV-like protein 1 OS=Homo sapiens GN=ELAVL1	8.47492	3	8	3	353	38.972
O75175	CCR4-NOT transcription complex subunit 3 OS=Homo sapiens GN=CNOT3 PE=1 SV=1	8.47098	4	8	4	753	81.822
Q5JRX3-2	Isoform 2 of Presequence protease, mitochondrial OS=Homo sapiens GN=PITRM1	8.46832	4	8	4	1038	117.437
Q9Y6N5	Sulfide:quinone oxidoreductase, mitochondrial OS=Homo sapiens GN=SQRDL PE=1 SV=1	8.46218	3	6	3	450	49.929
Q9H8H0	Nucleolar protein 11 OS=Homo sapiens GN=NOL11 PE=1 SV=1	8.45559	3	6	3	719	81.072
Q12874	Splicing factor 3A subunit 3 OS=Homo sapiens GN=SF3A3 PE=1 SV=1	8.45495	3	10	3	501	58.812
Q9UBP0	Spastin OS=Homo sapiens GN=SPAST PE=1 SV=1	8.45375	2	4	2	616	67.155
Q8TEB1	DDB1- and CUL4-associated factor 11 OS=Homo sapiens GN=DCAF11 PE=1 SV=1	8.44511	2	8	2	546	61.631
P49355	Protein farnesyltransferase subunit beta OS=Bos taurus GN=FNTB PE=2 SV=1	8.43898	2	4	2	437	48.736
P78310	Coxsackievirus and adenovirus receptor OS=Homo sapiens GN=CXADR PE=1 SV=1	8.42529	2	8	2	365	40.004
Q9BZD4	Kinetochore protein Nuf2 OS=Homo sapiens GN=NUF2 PE=1 SV=2	8.41598	3	8	3	464	54.269
Q9NX62	Inositol monophosphatase 3 OS=Homo sapiens GN=IMPAD1 PE=1 SV=1	8.40822	2	6	2	359	38.657
Q9BX40	Protein LSM14 homolog B OS=Homo sapiens GN=LSM14B PE=1 SV=1	8.4044	3	7	3	385	42.045
P51858	Hepatoma-derived growth factor OS=Homo sapiens GN=HDGF PE=1 SV=1	8.38899	3	11	3	240	26.772
Q99523	Sortilin OS=Homo sapiens GN=SORT1 PE=1 SV=3	8.37009	2	8	2	831	92.009
Q96GA3	Protein LTV1 homolog OS=Homo sapiens GN=LTV1 PE=1 SV=1	8.36141	3	6	3	475	54.821
Q8TBM8	DnaJ homolog subfamily B member 14 OS=Homo sapiens GN=DNAJB14 PE=1 SV=1	8.35246	3	8	3	379	42.489
Q9BU23	Lipase maturation factor 2 OS=Homo sapiens GN=LMF2 PE=1 SV=2	8.3418	3	6	3	707	79.647
Q9H814	Phosphorylated adapter RNA export protein OS=Homo sapiens GN=PHAX PE=1 SV=1	8.3208	3	8	3	394	44.375
Q9UHJ6	Sedoheptulokinase OS=Homo sapiens GN=SHPK PE=1 SV=3	8.3168	3	8	3	478	51.458
Q9NQH7	Probable Xaa-Pro aminopeptidase 3 OS=Homo sapiens GN=XPNPEP3 PE=1 SV=1	8.30932	3	13	2	507	56.997
P50552	Vasodilator-stimulated phosphoprotein OS=Homo sapiens GN=VASP PE=1 SV=3	8.3006	2	4	2	380	39.805
Q8IWZ6	Bardet-Biedl syndrome 7 protein OS=Homo sapiens GN=BBS7 PE=1 SV=2	8.29915	3	8	3	715	80.302
Q9Y305-4	Isoform 4 of Acyl-coenzyme A thioesterase 9, mitochondrial OS=Homo sapiens GN=ACOT9	8.29805	4	13	4	448	50.818
Q9UBB9	Tuftelin-interacting protein 11 OS=Homo sapiens GN=TFIP11 PE=1 SV=1	8.29373	3	8	3	837	96.758
Q9C0D3	Protein zyg-11 homolog B OS=Homo sapiens GN=ZYG11B PE=1 SV=2	8.29088	2	4	2	744	83.867
Q14978-2	Isoform Beta of Nucleolar and coiled-body phosphoprotein 1 OS=Homo sapiens GN=NOLC1	8.2842	3	8	3	709	74.702
P62424	60S ribosomal protein L7a OS=Homo sapiens GN=RPL7A PE=1 SV=2	8.28037	2	8	2	266	29.977
P41214	Eukaryotic translation initiation factor 2D OS=Homo sapiens GN=EIF2D PE=1 SV=3	8.27708	3	6	3	584	64.666
P51991	Heterogeneous nuclear ribonucleoprotein A3 OS=Homo sapiens GN=HNRNPA3 PE=1 SV=2	8.27548	2	14	2	378	39.571
O95251	Histone acetyltransferase KAT7 OS=Homo sapiens GN=KAT7 PE=1 SV=1	8.26797	2	4	2	611	70.598
Q96GS4	Uncharacterized protein C17orf59 OS=Homo sapiens GN=C17orf59 PE=1 SV=2	8.26226	3	6	3	357	37.204
Q9H2U1	ATP-dependent RNA helicase DHX36 OS=Homo sapiens GN=DHX36 PE=1 SV=2	8.26163	3	6	3	1008	114.688
Q99504	Eyes absent homolog 3 OS=Homo sapiens GN=EYA3 PE=1 SV=3	8.24314	3	6	3	573	62.624
O14744	Protein arginine N-methyltransferase 5 OS=Homo sapiens GN=PRMT5 PE=1 SV=4	8.22478	4	8	4	637	72.638
Q15007	Pre-mRNA-splicing regulator WTAP OS=Homo sapiens GN=WTAP PE=1 SV=2	8.22324	2	8	2	396	44.217
Q8WVB6-2	Isoform 2 of Chromosome transmission fidelity protein 18 homolog OS=Homo sapiens GN=CHTF18	8.21754	2	4	2	1003	110.14
Q9Y496	Kinesin-like protein KIF3A OS=Homo sapiens GN=KIF3A PE=1 SV=4	8.21498	3	6	3	699	79.991
P22033	Methylmalonyl-CoA mutase, mitochondrial OS=Homo sapiens GN=MUT PE=1 SV=4	8.21462	2	4	2	750	83.082
O95470	Sphingosine-1-phosphate lyase 1 OS=Homo sapiens GN=SGPL1 PE=1 SV=3	8.20853	3	12	3	568	63.483
P15121	Aldose reductase OS=Homo sapiens GN=AKR1B1 PE=1 SV=3	8.20074	4	12	4	316	35.83
Q2VPK5	Cytoplasmic tRNA 2-thiolation protein 2 OS=Homo sapiens GN=CTU2 PE=1 SV=1	8.20011	3	10	3	515	56.071
P21796	Voltage-dependent anion-selective channel protein 1 OS=Homo sapiens GN=VDAC1 PE=1 SV=2	8.18771	2	4	2	283	30.754
Q8WUM0	Nuclear pore complex protein Nup133 OS=Homo sapiens GN=NUP133 PE=1 SV=2	8.18181	3	6	3	1156	128.898
O00429-6	Isoform 6 of Dynamin-1-like protein OS=Homo sapiens GN=DNM1L	8.1797	3	8	3	749	83.347
P07199	Major centromere autoantigen B OS=Homo sapiens GN=CENPB PE=1 SV=2	8.16706	2	10	2	599	65.132
Q96JK2	DDB1- and CUL4-associated factor 5 OS=Homo sapiens GN=DCAF5 PE=1 SV=2	8.14128	2	7	2	942	103.899
Q13492	Phosphatidylinositol-binding clathrin assembly protein OS=Homo sapiens GN=PICALM PE=1 SV=2	8.13926	3	12	3	652	70.71
Q13206	Probable ATP-dependent RNA helicase DDX10 OS=Homo sapiens GN=DDX10 PE=1 SV=2	8.13195	3	6	3	875	100.825
Q6UWP7	Lysocardiolipin acyltransferase 1 OS=Homo sapiens GN=LCLAT1 PE=1 SV=1	8.12907	3	6	3	414	48.888
Q16352	Alpha-internexin OS=Homo sapiens GN=INA PE=1 SV=2	8.12491	4	10	3	499	55.357
P46020	Phosphorylase b kinase regulatory subunit alpha, skeletal muscle isoform OS=Homo sapiens GN=PHKA1 PE=1 SV=2	8.11687	2	6	2	1223	137.225
P49642	DNA primase small subunit OS=Homo sapiens GN=PRIM1 PE=1 SV=1	8.09762	3	8	3	420	49.87
P42566	Epidermal growth factor receptor substrate 15 OS=Homo sapiens GN=EPS15 PE=1 SV=2	8.0925	2	4	2	896	98.595
O75953-5	Isoform 3 of DnaJ homolog subfamily B member 5 OS=Homo sapiens GN=DNAJB5	8.08997	3	10	3	462	51.657
Q8NBX0	Saccharopine dehydrogenase-like oxidoreductase OS=Homo sapiens GN=SCCPDH PE=1 SV=1	8.08665	3	10	3	429	47.121
Q16851	UTP--glucose-1-phosphate uridylyltransferase OS=Homo sapiens GN=UGP2 PE=1 SV=5	8.06928	4	14	4	508	56.905
Q9NT62	Ubiquitin-like-conjugating enzyme ATG3 OS=Homo sapiens GN=ATG3 PE=1 SV=1	8.06618	2	6	2	314	35.841
Q9NYZ3	G2 and S phase-expressed protein 1 OS=Homo sapiens GN=GTSE1 PE=1 SV=3	8.06079	2	6	2	720	76.598
Q12834	Cell division cycle protein 20 homolog OS=Homo sapiens GN=CDC20 PE=1 SV=2	8.05012	3	8	3	499	54.689
P09110	3-ketoacyl-CoA thiolase, peroxisomal OS=Homo sapiens GN=ACAA1 PE=1 SV=2	8.04749	2	4	2	424	44.264
Q92925	SWI/SNF-related matrix-associated actin-dependent regulator of chromatin subfamily D member 2 OS=Homo sapiens GN=SMARCD2 PE=1 SV=3	8.04402	1	2	1	531	58.884
Q06787-7	Isoform 7 of Fragile X mental retardation protein 1 OS=Homo sapiens GN=FMR1	8.03906	3	8	2	615	69.137
Q15291	Retinoblastoma-binding protein 5 OS=Homo sapiens GN=RBBP5 PE=1 SV=2	8.03373	2	4	2	538	59.116
O95905-3	Isoform 3 of Protein ecdysoneless homolog OS=Homo sapiens GN=ECD	8.02944	3	6	3	677	76.46
P30260-2	Isoform 2 of Cell division cycle protein 27 homolog OS=Homo sapiens GN=CDC27	8.00266	4	8	4	830	92.554
O94964-2	Isoform 2 of Protein SOGA1 OS=Homo sapiens GN=SOGA1	7.98455	2	4	2	1661	183.744
O75592	E3 ubiquitin-protein ligase MYCBP2 OS=Homo sapiens GN=MYCBP2 PE=1 SV=3	7.98005	2	4	2	4640	509.759
O43837	Isocitrate dehydrogenase [NAD] subunit beta, mitochondrial OS=Homo sapiens GN=IDH3B PE=1 SV=2	7.97514	3	12	3	385	42.157
Q13618	Cullin-3 OS=Homo sapiens GN=CUL3 PE=1 SV=2	7.97458	2	8	2	768	88.873
Q9NPQ8-3	Isoform 3 of Synembryn-A OS=Homo sapiens GN=RIC8A	7.97034	2	4	2	537	60.334
Q8TD19	Serine/threonine-protein kinase Nek9 OS=Homo sapiens GN=NEK9 PE=1 SV=2	7.96904	3	6	3	979	107.1
O43290	U4/U6.U5 tri-snRNP-associated protein 1 OS=Homo sapiens GN=SART1 PE=1 SV=1	7.95927	2	4	2	800	90.2
P43003	Excitatory amino acid transporter 1 OS=Homo sapiens GN=SLC1A3 PE=1 SV=1	7.95701	1	6	1	542	59.534
Q61584	Fragile X mental retardation syndrome-related protein 1 OS=Mus musculus GN=Fxr1 PE=1 SV=2	7.95387	3	8	1	677	76.175
Q5JPH6-2	Isoform 2 of Probable glutamate--tRNA ligase, mitochondrial OS=Homo sapiens GN=EARS2	7.93673	4	12	4	534	59.951
Q9H089	Large subunit GTPase 1 homolog OS=Homo sapiens GN=LSG1 PE=1 SV=2	7.93473	4	8	4	658	75.178
Q9H8M7	Protein FAM188A OS=Homo sapiens GN=FAM188A PE=1 SV=1	7.91642	2	8	2	445	49.693
Q96SB8-2	Isoform 2 of Structural maintenance of chromosomes protein 6 OS=Homo sapiens GN=SMC6	7.91592	2	4	2	1117	129.073
O95163	Elongator complex protein 1 OS=Homo sapiens GN=IKBKAP PE=1 SV=3	7.90614	2	6	2	1332	150.159
P05067	Amyloid beta A4 protein OS=Homo sapiens GN=APP PE=1 SV=3	7.90078	3	6	3	770	86.888
P01040	Cystatin-A OS=Homo sapiens GN=CSTA PE=1 SV=1	7.89585	2	5	2	98	11
Q96T17-2	Isoform 2 of MAP7 domain-containing protein 2 OS=Homo sapiens GN=MAP7D2	7.89265	3	6	3	773	86.296
P26440	Isovaleryl-CoA dehydrogenase, mitochondrial OS=Homo sapiens GN=IVD PE=1 SV=1	7.88003	3	8	3	423	46.29
Q07960	Rho GTPase-activating protein 1 OS=Homo sapiens GN=ARHGAP1 PE=1 SV=1	7.85823	3	8	3	439	50.404
Q8NBN7	Retinol dehydrogenase 13 OS=Homo sapiens GN=RDH13 PE=1 SV=2	7.85459	2	6	2	331	35.91
P16219	Short-chain specific acyl-CoA dehydrogenase, mitochondrial OS=Homo sapiens GN=ACADS PE=1 SV=1	7.84629	2	4	2	412	44.269
O00170	AH receptor-interacting protein OS=Homo sapiens GN=AIP PE=1 SV=2	7.84554	3	8	3	330	37.612
Q9NVE7	Pantothenate kinase 4 OS=Homo sapiens GN=PANK4 PE=1 SV=1	7.81613	2	8	2	773	85.937
Q92791	Synaptonemal complex protein SC65 OS=Homo sapiens GN=P3H4 PE=1 SV=1	7.81115	3	6	3	437	50.349
P42025	Beta-centractin OS=Homo sapiens GN=ACTR1B PE=1 SV=1	7.80345	4	14	1	376	42.267
O60333-4	Isoform 4 of Kinesin-like protein KIF1B OS=Homo sapiens GN=KIF1B	7.8032	3	6	3	1823	205.012
Q27J81	Inverted formin-2 OS=Homo sapiens GN=INF2 PE=1 SV=2	7.80053	2	4	2	1249	135.54
Q9NW64	Pre-mRNA-splicing factor RBM22 OS=Homo sapiens GN=RBM22 PE=1 SV=1	7.79308	3	8	3	420	46.865
Q93050-3	Isoform 3 of V-type proton ATPase 116 kDa subunit a isoform 1 OS=Homo sapiens GN=ATP6V0A1	7.78768	3	10	3	838	96.537
P01892	HLA class I histocompatibility antigen, A-2 alpha chain OS=Homo sapiens GN=HLA-A PE=1 SV=1	7.77461	3	12	1	365	40.896
Q92544	Transmembrane 9 superfamily member 4 OS=Homo sapiens GN=TM9SF4 PE=1 SV=2	7.77189	3	12	3	642	74.47
Q15392	Delta(24)-sterol reductase OS=Homo sapiens GN=DHCR24 PE=1 SV=2	7.7608	2	14	2	516	60.062
Q02809-2	Isoform 2 of Procollagen-lysine,2-oxoglutarate 5-dioxygenase 1 OS=Homo sapiens GN=PLOD1	7.7565	3	6	3	774	88.217
O94952	F-box only protein 21 OS=Homo sapiens GN=FBXO21 PE=2 SV=2	7.75323	2	8	2	628	72.224
Q8N961	Ankyrin repeat and BTB/POZ domain-containing protein 2 OS=Homo sapiens GN=ABTB2 PE=2 SV=2	7.75085	4	8	4	1025	113.584
Q00653	Nuclear factor NF-kappa-B p100 subunit OS=Homo sapiens GN=NFKB2 PE=1 SV=4	7.74622	2	4	2	900	96.689
Q86WT1	Tetratricopeptide repeat protein 30A OS=Homo sapiens GN=TTC30A PE=2 SV=3	7.73614	3	6	3	665	76.087
P22830-2	Isoform 2 of Ferrochelatase, mitochondrial OS=Homo sapiens GN=FECH	7.73539	3	6	3	429	48.594
Q9BUQ8	Probable ATP-dependent RNA helicase DDX23 OS=Homo sapiens GN=DDX23 PE=1 SV=3	7.72189	3	6	3	820	95.524
Q86YZ3	Hornerin OS=Homo sapiens GN=HRNR PE=1 SV=2	7.71892	2	10	2	2850	282.228
Q96KA5	Cleft lip and palate transmembrane protein 1-like protein OS=Homo sapiens GN=CLPTM1L PE=1 SV=1	7.70533	2	14	2	538	62.189
Q9Y5B8	Nucleoside diphosphate kinase 7 OS=Homo sapiens GN=NME7 PE=1 SV=1	7.69187	3	14	3	376	42.464
P30419	Glycylpeptide N-tetradecanoyltransferase 1 OS=Homo sapiens GN=NMT1 PE=1 SV=2	7.69128	3	12	3	496	56.77
O60784-2	Isoform 2 of Target of Myb protein 1 OS=Homo sapiens GN=TOM1	7.68855	2	8	2	493	53.841
Q9NW75	G patch domain-containing protein 2 OS=Homo sapiens GN=GPATCH2 PE=1 SV=1	7.68131	1	6	1	528	58.907
O96005	Cleft lip and palate transmembrane protein 1 OS=Homo sapiens GN=CLPTM1 PE=1 SV=1	7.67551	3	8	3	669	76.048
Q8TBA6	Golgin subfamily A member 5 OS=Homo sapiens GN=GOLGA5 PE=1 SV=3	7.66721	2	9	2	731	82.974
P13798	Acylamino-acid-releasing enzyme OS=Homo sapiens GN=APEH PE=1 SV=4	7.66689	3	6	3	732	81.173
Q96F44	E3 ubiquitin-protein ligase TRIM11 OS=Homo sapiens GN=TRIM11 PE=1 SV=2	7.6655	2	4	2	468	52.741
Q6IA86-6	Isoform 6 of Elongator complex protein 2 OS=Homo sapiens GN=ELP2	7.65353	2	4	2	891	99.924
Q06609	DNA repair protein RAD51 homolog 1 OS=Homo sapiens GN=RAD51 PE=1 SV=1	7.65233	2	4	2	339	36.943
Q9ULR0-1	Isoform 2 of Pre-mRNA-splicing factor ISY1 homolog OS=Homo sapiens GN=ISY1	7.64351	2	4	2	331	37.543
Q9H7D7	WD repeat-containing protein 26 OS=Homo sapiens GN=WDR26 PE=1 SV=3	7.6365	4	8	4	661	72.079
Q8IWZ8	SURP and G-patch domain-containing protein 1 OS=Homo sapiens GN=SUGP1 PE=1 SV=2	7.63432	2	4	2	645	72.425
Q9UNW1	Multiple inositol polyphosphate phosphatase 1 OS=Homo sapiens GN=MINPP1 PE=1 SV=1	7.61992	2	8	2	487	55.016
Q14457	Beclin-1 OS=Homo sapiens GN=BECN1 PE=1 SV=2	7.61615	3	8	3	450	51.863
Q9Y6W5	Wiskott-Aldrich syndrome protein family member 2 OS=Homo sapiens GN=WASF2 PE=1 SV=3	7.60723	3	6	3	498	54.25
Q9ULP9	TBC1 domain family member 24 OS=Homo sapiens GN=TBC1D24 PE=1 SV=2	7.60298	2	6	2	559	62.879
Q8WWH5	Probable tRNA pseudouridine synthase 1 OS=Homo sapiens GN=TRUB1 PE=1 SV=1	7.59994	3	7	3	349	37.229
Q12788	Transducin beta-like protein 3 OS=Homo sapiens GN=TBL3 PE=1 SV=2	7.5997	3	6	3	808	88.978
P06400	Retinoblastoma-associated protein OS=Homo sapiens GN=RB1 PE=1 SV=2	7.59907	3	6	3	928	106.092
Q8IXW5	Putative RNA polymerase II subunit B1 CTD phosphatase RPAP2 OS=Homo sapiens GN=RPAP2 PE=1 SV=1	7.59486	2	4	2	612	69.466
P27348	14-3-3 protein theta OS=Homo sapiens GN=YWHAQ PE=1 SV=1	7.58925	3	12	1	245	27.747
Q9NZL9	Methionine adenosyltransferase 2 subunit beta OS=Homo sapiens GN=MAT2B PE=1 SV=1	7.5872	3	10	3	334	37.528
Q99808-2	Isoform 2 of Equilibrative nucleoside transporter 1 OS=Homo sapiens GN=SLC29A1	7.57751	2	5	2	535	58.925
Q9NX46	Poly(ADP-ribose) glycohydrolase ARH3 OS=Homo sapiens GN=ADPRHL2 PE=1 SV=1	7.56633	2	12	2	363	38.922
Q9NXA8	NAD-dependent protein deacylase sirtuin-5, mitochondrial OS=Homo sapiens GN=SIRT5 PE=1 SV=2	7.54923	2	4	2	310	33.859
Q12824	SWI/SNF-related matrix-associated actin-dependent regulator of chromatin subfamily B member 1 OS=Homo sapiens GN=SMARCB1 PE=1 SV=2	7.53315	3	8	3	385	44.113
Q8IWB7	WD repeat and FYVE domain-containing protein 1 OS=Homo sapiens GN=WDFY1 PE=1 SV=1	7.5278	2	8	2	410	46.293
Q9Y2I8-2	Isoform 2 of WD repeat-containing protein 37 OS=Homo sapiens GN=WDR37	7.52413	2	8	2	495	54.76
Q9Y679	Ancient ubiquitous protein 1 OS=Homo sapiens GN=AUP1 PE=1 SV=1	7.51005	3	8	3	476	52.995
Q9HCS7	Pre-mRNA-splicing factor SYF1 OS=Homo sapiens GN=XAB2 PE=1 SV=2	7.50808	2	4	2	855	99.946
Q13627	Dual specificity tyrosine-phosphorylation-regulated kinase 1A OS=Homo sapiens GN=DYRK1A PE=1 SV=2	7.50629	2	6	2	763	85.53
Q86TB9	Protein PAT1 homolog 1 OS=Homo sapiens GN=PATL1 PE=1 SV=2	7.50527	2	4	2	770	86.796
Q9UGI8	Testin OS=Homo sapiens GN=TES PE=1 SV=1	7.50134	3	8	3	421	47.964
Q53F19	Nuclear cap-binding protein subunit 3 OS=Homo sapiens GN=NCBP3 PE=1 SV=2	7.50084	3	6	3	620	70.549
O95801	Tetratricopeptide repeat protein 4 OS=Homo sapiens GN=TTC4 PE=1 SV=3	7.49452	2	8	2	387	44.65
Q9NRD5	PRKCA-binding protein OS=Homo sapiens GN=PICK1 PE=1 SV=2	7.49039	2	4	2	415	46.571
Q53R41	FAST kinase domain-containing protein 1, mitochondrial OS=Homo sapiens GN=FASTKD1 PE=1 SV=1	7.48609	3	6	3	847	97.348
Q96ED9	Protein Hook homolog 2 OS=Homo sapiens GN=HOOK2 PE=1 SV=3	7.48266	3	6	3	719	83.155
Q9BRL6	Serine/arginine-rich splicing factor 8 OS=Homo sapiens GN=SRSF8 PE=1 SV=1	7.48036	3	12	1	282	32.268
Q5JTC6	APC membrane recruitment protein 1 OS=Homo sapiens GN=AMER1 PE=1 SV=2	7.47839	2	4	2	1135	123.952
Q8NBJ4	Golgi membrane protein 1 OS=Homo sapiens GN=GOLM1 PE=1 SV=1	7.47791	3	6	3	401	45.306
P56182	Ribosomal RNA processing protein 1 homolog A OS=Homo sapiens GN=RRP1 PE=1 SV=1	7.47713	2	8	2	461	52.807
Q9UHK0	Nuclear fragile X mental retardation-interacting protein 1 OS=Homo sapiens GN=NUFIP1 PE=1 SV=2	7.46049	3	6	3	495	56.264
Q8BHJ5	F-box-like/WD repeat-containing protein TBL1XR1 OS=Mus musculus GN=Tbl1xr1 PE=1 SV=1	7.45588	2	8	2	514	55.626
Q8IYS2-2	Isoform 2 of Uncharacterized protein KIAA2013 OS=Homo sapiens GN=KIAA2013	7.45229	2	4	2	667	72.635
P16333	Cytoplasmic protein NCK1 OS=Homo sapiens GN=NCK1 PE=1 SV=1	7.45051	2	10	2	377	42.837
O96019	Actin-like protein 6A OS=Homo sapiens GN=ACTL6A PE=1 SV=1	7.44067	2	9	2	429	47.43
O14531	Dihydropyrimidinase-related protein 4 OS=Homo sapiens GN=DPYSL4 PE=1 SV=2	7.43843	2	4	2	572	61.838
Q8N448	Ligand of Numb protein X 2 OS=Homo sapiens GN=LNX2 PE=1 SV=1	7.42955	2	6	2	690	75.956
P57737-3	Isoform 3 of Coronin-7 OS=Homo sapiens GN=CORO7	7.42574	2	4	2	1048	114.095
Q8NEB9	Phosphatidylinositol 3-kinase catalytic subunit type 3 OS=Homo sapiens GN=PIK3C3 PE=1 SV=1	7.42405	2	4	2	887	101.485
Q9UJX4	Anaphase-promoting complex subunit 5 OS=Homo sapiens GN=ANAPC5 PE=1 SV=2	7.42044	2	4	2	755	85.023
Q92665	28S ribosomal protein S31, mitochondrial OS=Homo sapiens GN=MRPS31 PE=1 SV=3	7.40885	2	8	2	395	45.29
Q9Y223-2	Isoform 2 of Bifunctional UDP-N-acetylglucosamine 2-epimerase/N-acetylmannosamine kinase OS=Homo sapiens GN=GNE	7.40817	3	6	3	753	83.013
Q5JSH3	WD repeat-containing protein 44 OS=Homo sapiens GN=WDR44 PE=1 SV=1	7.40749	1	2	1	913	101.304
Q9BTV4	Transmembrane protein 43 OS=Homo sapiens GN=TMEM43 PE=1 SV=1	7.40112	3	10	3	400	44.847
Q8IY67-2	Isoform 2 of Ribonucleoprotein PTB-binding 1 OS=Homo sapiens GN=RAVER1	7.39968	3	6	3	739	77.811
Q9P035	Very-long-chain (3R)-3-hydroxyacyl-CoA dehydratase 3 OS=Homo sapiens GN=HACD3 PE=1 SV=2	7.39804	2	24	2	362	43.132
Q16881	Thioredoxin reductase 1, cytoplasmic OS=Homo sapiens GN=TXNRD1 PE=1 SV=3	7.39616	4	15	4	649	70.862
Q5K4L6	Long-chain fatty acid transport protein 3 OS=Homo sapiens GN=SLC27A3 PE=2 SV=3	7.39437	1	2	1	730	78.594
Q9NY27	Serine/threonine-protein phosphatase 4 regulatory subunit 2 OS=Homo sapiens GN=PPP4R2 PE=1 SV=3	7.38015	2	4	2	417	46.869
Q16625	Occludin OS=Homo sapiens GN=OCLN PE=1 SV=1	7.37253	2	8	2	522	59.106
Q9Y697	Cysteine desulfurase, mitochondrial OS=Homo sapiens GN=NFS1 PE=1 SV=3	7.36892	2	4	2	457	50.164
Q68EM7	Rho GTPase-activating protein 17 OS=Homo sapiens GN=ARHGAP17 PE=1 SV=1	7.3631	3	6	3	881	95.377
Q95JJ5	Coiled-coil domain-containing protein 138 OS=Macaca fascicularis GN=CCDC138 PE=2 SV=1	7.35963	2	4	2	665	76.333
Q5RF82	Protein misato homolog 1 OS=Pongo pygmaeus GN=MSTO1 PE=2 SV=1	7.35254	2	10	2	570	61.872
Q00013	55 kDa erythrocyte membrane protein OS=Homo sapiens GN=MPP1 PE=1 SV=2	7.34069	3	8	3	466	52.264
Q14BN4	Sarcolemmal membrane-associated protein OS=Homo sapiens GN=SLMAP PE=1 SV=1	7.33929	3	6	3	828	95.14
Q6UX04	Peptidyl-prolyl cis-trans isomerase CWC27 homolog OS=Homo sapiens GN=CWC27 PE=1 SV=1	7.33835	2	6	2	472	53.814
Q6FI81	Anamorsin OS=Homo sapiens GN=CIAPIN1 PE=1 SV=2	7.33834	4	8	4	312	33.561
Q9BTX1	Nucleoporin NDC1 OS=Homo sapiens GN=NDC1 PE=1 SV=2	7.33383	3	6	3	674	76.255
O75794	Cell division cycle protein 123 homolog OS=Homo sapiens GN=CDC123 PE=1 SV=1	7.32215	3	14	3	336	39.11
P62826	GTP-binding nuclear protein Ran OS=Homo sapiens GN=RAN PE=1 SV=3	7.32146	3	12	3	216	24.408
Q53GT1	Kelch-like protein 22 OS=Homo sapiens GN=KLHL22 PE=1 SV=2	7.31655	2	4	2	634	71.621
Q96G03	Phosphoglucomutase-2 OS=Homo sapiens GN=PGM2 PE=1 SV=4	7.29942	2	4	2	612	68.24
Q96D46	60S ribosomal export protein NMD3 OS=Homo sapiens GN=NMD3 PE=1 SV=1	7.28101	2	14	2	503	57.566
Q9BVL4	Selenoprotein O OS=Homo sapiens GN=SELO PE=2 SV=3	7.27725	2	4	2	669	73.444
Q9C0E8-4	Isoform 4 of Protein lunapark OS=Homo sapiens GN=LNP	7.26628	4	14	4	459	50.817
Q9UBQ7	Glyoxylate reductase/hydroxypyruvate reductase OS=Homo sapiens GN=GRHPR PE=1 SV=1	7.26508	2	4	2	328	35.646
P35241-5	Isoform 5 of Radixin OS=Homo sapiens GN=RDX	7.2625	4	8	2	604	71.005
Q8N5U6-2	Isoform 2 of RING finger protein 10 OS=Homo sapiens GN=RNF10	7.23185	2	6	2	816	90.44
O15228	Dihydroxyacetone phosphate acyltransferase OS=Homo sapiens GN=GNPAT PE=1 SV=1	7.20585	3	6	3	680	77.138
Q9Y371	Endophilin-B1 OS=Homo sapiens GN=SH3GLB1 PE=1 SV=1	7.2028	3	8	3	365	40.771
Q00536-2	Isoform 2 of Cyclin-dependent kinase 16 OS=Homo sapiens GN=CDK16	7.17396	3	14	1	570	63.418
Q8TD10	Mirror-image polydactyly gene 1 protein OS=Homo sapiens GN=MIPOL1 PE=1 SV=1	7.16922	2	6	2	442	51.505
Q9BY42	Protein RTF2 homolog OS=Homo sapiens GN=RTFDC1 PE=1 SV=3	7.16669	3	6	3	306	33.865
Q8N0X7	Spartin OS=Homo sapiens GN=SPG20 PE=1 SV=1	7.15794	2	6	2	666	72.788
Q08554	Desmocollin-1 OS=Homo sapiens GN=DSC1 PE=1 SV=2	7.15528	3	8	3	894	99.924
O75521	Enoyl-CoA delta isomerase 2, mitochondrial OS=Homo sapiens GN=ECI2 PE=1 SV=4	7.15395	2	6	2	394	43.557
Q9UJ70-2	Isoform 2 of N-acetyl-D-glucosamine kinase OS=Homo sapiens GN=NAGK	7.15376	2	4	2	390	42.011
Q8NDZ4	Deleted in autism protein 1 OS=Homo sapiens GN=C3orf58 PE=1 SV=1	7.13085	2	4	2	430	49.45
Q9BT40	Inositol polyphosphate 5-phosphatase K OS=Homo sapiens GN=INPP5K PE=1 SV=3	7.12141	3	8	3	448	51.058
Q9H2J7	Sodium-dependent neutral amino acid transporter B(0)AT2 OS=Homo sapiens GN=SLC6A15 PE=1 SV=1	7.11895	2	4	2	730	81.783
Q13630	GDP-L-fucose synthase OS=Homo sapiens GN=TSTA3 PE=1 SV=1	7.10736	3	12	3	321	35.87
Q14241	Transcription elongation factor B polypeptide 3 OS=Homo sapiens GN=TCEB3 PE=1 SV=2	7.10552	2	4	2	798	89.853
Q12768	WASH complex subunit strumpellin OS=Homo sapiens GN=KIAA0196 PE=1 SV=1	7.09989	2	4	2	1159	134.201
P14324	Farnesyl pyrophosphate synthase OS=Homo sapiens GN=FDPS PE=1 SV=4	7.08897	3	10	3	419	48.245
Q9NUT2	ATP-binding cassette sub-family B member 8, mitochondrial OS=Homo sapiens GN=ABCB8 PE=1 SV=3	7.07325	2	6	2	735	79.938
P81605-2	Isoform 2 of Dermcidin OS=Homo sapiens GN=DCD	7.05144	2	16	2	121	12.406
P30038	Delta-1-pyrroline-5-carboxylate dehydrogenase, mitochondrial OS=Homo sapiens GN=ALDH4A1 PE=1 SV=3	7.04791	2	4	2	563	61.681
Q9UGJ1	Gamma-tubulin complex component 4 OS=Homo sapiens GN=TUBGCP4 PE=1 SV=1	7.0412	2	4	2	667	76.041
Q5T6F2	Ubiquitin-associated protein 2 OS=Homo sapiens GN=UBAP2 PE=1 SV=1	7.02475	2	4	2	1119	117.044
Q9BRS2	Serine/threonine-protein kinase RIO1 OS=Homo sapiens GN=RIOK1 PE=1 SV=2	7.02278	2	4	2	568	65.542
P63096	Guanine nucleotide-binding protein G(i) subunit alpha-1 OS=Homo sapiens GN=GNAI1 PE=1 SV=2	7.0202	2	8	1	354	40.335
Q9Y6J9	TAF6-like RNA polymerase II p300/CBP-associated factor-associated factor 65 kDa subunit 6L OS=Homo sapiens GN=TAF6L PE=1 SV=1	7.01789	3	6	3	622	67.772
Q5T0W9	Protein FAM83B OS=Homo sapiens GN=FAM83B PE=1 SV=1	7.00589	3	6	3	1011	114.729
Q9UKT7	F-box/LRR-repeat protein 3 OS=Homo sapiens GN=FBXL3 PE=1 SV=1	6.9994	2	6	2	428	48.676
Q15345	Leucine-rich repeat-containing protein 41 OS=Homo sapiens GN=LRRC41 PE=1 SV=3	6.99823	2	4	2	812	88.594
Q9H5H4	Zinc finger protein 768 OS=Homo sapiens GN=ZNF768 PE=1 SV=2	6.99146	3	6	3	540	60.191
Q9UKZ1	CCR4-NOT transcription complex subunit 11 OS=Homo sapiens GN=CNOT11 PE=1 SV=1	6.98957	2	6	2	510	55.18
O15143	Actin-related protein 2/3 complex subunit 1B OS=Homo sapiens GN=ARPC1B PE=1 SV=3	6.98775	2	4	2	372	40.923
P27797	Calreticulin OS=Homo sapiens GN=CALR PE=1 SV=1	6.97656	3	8	3	417	48.112
Q9HCN4-5	Isoform 5 of GPN-loop GTPase 1 OS=Homo sapiens GN=GPN1	6.91311	2	9	2	388	43.318
P52594-4	Isoform 4 of Arf-GAP domain and FG repeat-containing protein 1 OS=Homo sapiens GN=AGFG1	6.90413	1	4	1	584	60.729
Q7Z392	Trafficking protein particle complex subunit 11 OS=Homo sapiens GN=TRAPPC11 PE=1 SV=2	6.88706	2	4	2	1133	128.798
Q9Y2D4	Exocyst complex component 6B OS=Homo sapiens GN=EXOC6B PE=1 SV=3	6.88342	2	4	2	811	94.141
Q9NXG2	THUMP domain-containing protein 1 OS=Homo sapiens GN=THUMPD1 PE=1 SV=2	6.87843	2	4	2	353	39.291
Q9H8Y8-3	Isoform 3 of Golgi reassembly-stacking protein 2 OS=Homo sapiens GN=GORASP2	6.87317	2	10	2	464	48.644
Q9UGP4	LIM domain-containing protein 1 OS=Homo sapiens GN=LIMD1 PE=1 SV=1	6.8622	2	6	2	676	72.144
Q9P0V9-2	Isoform 2 of Septin-10 OS=Homo sapiens GN=SEPT10	6.86064	2	6	2	503	58.099
Q07955-2	Isoform ASF-2 of Serine/arginine-rich splicing factor 1 OS=Homo sapiens GN=SRSF1	6.84917	2	8	2	292	31.979
Q86YB8	ERO1-like protein beta OS=Homo sapiens GN=ERO1B PE=1 SV=2	6.84885	2	6	1	467	53.509
Q96KB5-2	Isoform 2 of Lymphokine-activated killer T-cell-originated protein kinase OS=Homo sapiens GN=PBK	6.84827	3	10	3	333	37.188
P27986-4	Isoform 4 of Phosphatidylinositol 3-kinase regulatory subunit alpha OS=Homo sapiens GN=PIK3R1	6.83342	3	8	2	732	84.422
P09661	U2 small nuclear ribonucleoprotein A' OS=Homo sapiens GN=SNRPA1 PE=1 SV=2	6.82592	3	8	3	255	28.398
Q9Y2Z2-6	Isoform 7 of Protein MTO1 homolog, mitochondrial OS=Homo sapiens GN=MTO1	6.81897	3	6	3	732	81.486
Q15025	TNFAIP3-interacting protein 1 OS=Homo sapiens GN=TNIP1 PE=1 SV=2	6.81622	2	4	2	636	71.82
Q9BYV8	Centrosomal protein of 41 kDa OS=Homo sapiens GN=CEP41 PE=1 SV=1	6.81023	1	2	1	373	41.343
Q15006	ER membrane protein complex subunit 2 OS=Homo sapiens GN=EMC2 PE=1 SV=1	6.80732	2	6	2	297	34.811
Q93100	Phosphorylase b kinase regulatory subunit beta OS=Homo sapiens GN=PHKB PE=1 SV=3	6.80694	2	4	2	1093	124.805
P0CQ71	ATP-dependent RNA helicase eIF4A OS=Cryptococcus neoformans var. neoformans serotype D (strain B-3501A) GN=TIF1 PE=3 SV=1	6.79733	3	22	1	401	45.115
Q7Z628	Neuroepithelial cell-transforming gene 1 protein OS=Homo sapiens GN=NET1 PE=1 SV=1	6.79483	2	6	2	596	67.698
O60678	Protein arginine N-methyltransferase 3 OS=Homo sapiens GN=PRMT3 PE=1 SV=3	6.78948	3	8	3	531	59.838
Q9P2R3-4	Isoform 4 of Rabankyrin-5 OS=Homo sapiens GN=ANKFY1	6.78768	3	6	3	1211	132.737
Q14CB8-2	Isoform 2 of Rho GTPase-activating protein 19 OS=Homo sapiens GN=ARHGAP19	6.75675	2	6	2	517	57.952
Q6P1M9	Armadillo repeat-containing X-linked protein 5 OS=Homo sapiens GN=ARMCX5 PE=1 SV=1	6.75076	2	4	2	558	62.307
Q08722	Leukocyte surface antigen CD47 OS=Homo sapiens GN=CD47 PE=1 SV=1	6.74078	3	16	3	323	35.191
O00273	DNA fragmentation factor subunit alpha OS=Homo sapiens GN=DFFA PE=1 SV=1	6.73931	2	8	2	331	36.5
Q9H1E3	Nuclear ubiquitous casein and cyclin-dependent kinase substrate 1 OS=Homo sapiens GN=NUCKS1 PE=1 SV=1	6.73743	2	6	2	243	27.28
Q05086	Ubiquitin-protein ligase E3A OS=Homo sapiens GN=UBE3A PE=1 SV=4	6.73358	2	4	2	875	100.623
Q9H3P2	Negative elongation factor A OS=Homo sapiens GN=NELFA PE=1 SV=3	6.72634	2	7	2	528	57.241
Q9Y5P6-2	Isoform 2 of Mannose-1-phosphate guanyltransferase beta OS=Homo sapiens GN=GMPPB	6.71953	3	8	3	387	42.594
Q96F63	Coiled-coil domain-containing protein 97 OS=Homo sapiens GN=CCDC97 PE=1 SV=1	6.71937	2	6	2	343	38.923
P27708	CAD protein OS=Homo sapiens GN=CAD PE=1 SV=3	6.7123	2	4	2	2225	242.829
Q8IXI2-3	Isoform 3 of Mitochondrial Rho GTPase 1 OS=Homo sapiens GN=RHOT1	6.70219	2	4	2	691	79.496
O75955	Flotillin-1 OS=Homo sapiens GN=FLOT1 PE=1 SV=3	6.69752	2	8	2	427	47.326
Q8WVZ9	Kelch repeat and BTB domain-containing protein 7 OS=Homo sapiens GN=KBTBD7 PE=1 SV=1	6.69547	2	4	1	684	77.114
O94888	UBX domain-containing protein 7 OS=Homo sapiens GN=UBXN7 PE=1 SV=2	6.69302	4	8	4	489	54.828
Q8NBI6	Xyloside xylosyltransferase 1 OS=Homo sapiens GN=XXYLT1 PE=1 SV=1	6.68571	4	8	4	393	43.778
Q92733	Proline-rich protein PRCC OS=Homo sapiens GN=PRCC PE=1 SV=1	6.68194	1	2	1	491	52.386
Q9HA65	TBC1 domain family member 17 OS=Homo sapiens GN=TBC1D17 PE=1 SV=2	6.67862	3	6	3	648	72.682
Q9HCU5	Prolactin regulatory element-binding protein OS=Homo sapiens GN=PREB PE=1 SV=2	6.67637	2	8	2	417	45.44
O75127	Pentatricopeptide repeat-containing protein 1, mitochondrial OS=Homo sapiens GN=PTCD1 PE=1 SV=2	6.67509	3	6	3	700	78.806
Q86W34	Archaemetzincin-2 OS=Homo sapiens GN=AMZ2 PE=1 SV=2	6.67267	3	10	3	360	41.237
Q9P0K7-2	Isoform 2 of Ankycorbin OS=Homo sapiens GN=RAI14	6.6644	2	6	2	983	110.354
Q9Z2Z9	Glutamine--fructose-6-phosphate aminotransferase [isomerizing] 2 OS=Mus musculus GN=Gfpt2 PE=1 SV=3	6.66051	2	4	1	682	76.96
Q8C5L3	CCR4-NOT transcription complex subunit 2 OS=Mus musculus GN=Cnot2 PE=1 SV=2	6.66014	2	6	2	540	59.673
Q96L92	Sorting nexin-27 OS=Homo sapiens GN=SNX27 PE=1 SV=2	6.6593	2	4	2	541	61.226
Q8N720-3	Isoform 3 of Zinc finger protein 655 OS=Homo sapiens GN=ZNF655	6.65607	2	4	2	526	61.331
O15169	Axin-1 OS=Homo sapiens GN=AXIN1 PE=1 SV=2	6.64981	2	4	2	862	95.576
P61964	WD repeat-containing protein 5 OS=Homo sapiens GN=WDR5 PE=1 SV=1	6.63574	2	14	2	334	36.565
Q92503-2	Isoform 2 of SEC14-like protein 1 OS=Homo sapiens GN=SEC14L1	6.62615	2	4	2	719	81.79
Q5VTE6	Protein angel homolog 2 OS=Homo sapiens GN=ANGEL2 PE=2 SV=1	6.62307	2	6	2	544	62.299
Q8N6H7	ADP-ribosylation factor GTPase-activating protein 2 OS=Homo sapiens GN=ARFGAP2 PE=1 SV=1	6.61053	2	8	2	521	56.685
Q96T37	Putative RNA-binding protein 15 OS=Homo sapiens GN=RBM15 PE=1 SV=2	6.60761	3	6	3	977	107.124
Q9HBK9	Arsenite methyltransferase OS=Homo sapiens GN=AS3MT PE=1 SV=3	6.60484	2	4	2	375	41.721
Q8N5C6	S1 RNA-binding domain-containing protein 1 OS=Homo sapiens GN=SRBD1 PE=1 SV=2	6.60177	2	4	2	995	111.705
P50336	Protoporphyrinogen oxidase OS=Homo sapiens GN=PPOX PE=1 SV=1	6.59197	2	6	2	477	50.734
Q07002-3	Isoform 3 of Cyclin-dependent kinase 18 OS=Homo sapiens GN=CDK18	6.59012	3	15	1	504	57.541
Q9Y5K6	CD2-associated protein OS=Homo sapiens GN=CD2AP PE=1 SV=1	6.57944	2	4	2	639	71.407
P32121-4	Isoform 4 of Beta-arrestin-2 OS=Homo sapiens GN=ARRB2	6.57741	2	6	2	430	47.985
O15226-2	Isoform 2 of NF-kappa-B-repressing factor OS=Homo sapiens GN=NKRF	6.57508	3	6	3	705	79.446
Q9NUL7	Probable ATP-dependent RNA helicase DDX28 OS=Homo sapiens GN=DDX28 PE=1 SV=2	6.57158	2	5	2	540	59.545
Q8IV08	Phospholipase D3 OS=Homo sapiens GN=PLD3 PE=1 SV=1	6.57024	2	10	2	490	54.671
P17480	Nucleolar transcription factor 1 OS=Homo sapiens GN=UBTF PE=1 SV=1	6.56404	2	8	2	764	89.35
Q9NQA3	WAS protein family homolog 6 OS=Homo sapiens GN=WASH6P PE=1 SV=3	6.56067	1	2	1	447	47.961
O60645	Exocyst complex component 3 OS=Homo sapiens GN=EXOC3 PE=1 SV=2	6.54959	4	8	4	756	86.79
Q08AM6	Protein VAC14 homolog OS=Homo sapiens GN=VAC14 PE=1 SV=1	6.54039	2	8	2	782	87.917
P78345	Ribonuclease P protein subunit p38 OS=Homo sapiens GN=RPP38 PE=1 SV=2	6.5367	1	2	1	283	31.815
Q12955	Ankyrin-3 OS=Homo sapiens GN=ANK3 PE=1 SV=3	6.53523	2	6	2	4377	480.113
Q9UBF8-2	Isoform 2 of Phosphatidylinositol 4-kinase beta OS=Homo sapiens GN=PI4KB	6.5286	3	6	3	801	89.751
Q96P70	Importin-9 OS=Homo sapiens GN=IPO9 PE=1 SV=3	6.52761	2	4	2	1041	115.889
A5A6J8	Sodium/potassium-transporting ATPase subunit beta-1 OS=Pan troglodytes GN=ATP1B1 PE=2 SV=1	6.52419	2	8	2	303	35.053
P35659	Protein DEK OS=Homo sapiens GN=DEK PE=1 SV=1	6.51334	2	6	2	375	42.648
Q7YR38	Serine/threonine-protein phosphatase 1 regulatory subunit 10 OS=Pan troglodytes GN=PPP1R10 PE=3 SV=1	6.5093	2	4	2	940	99.065
Q13439-5	Isoform 5 of Golgin subfamily A member 4 OS=Homo sapiens GN=GOLGA4	6.50769	3	6	3	2243	262.167
Q9UG63-2	Isoform 2 of ATP-binding cassette sub-family F member 2 OS=Homo sapiens GN=ABCF2	6.50759	3	6	3	634	72.397
Q8NHU6	Tudor domain-containing protein 7 OS=Homo sapiens GN=TDRD7 PE=1 SV=2	6.50013	2	4	2	1098	123.506
Q96C36	Pyrroline-5-carboxylate reductase 2 OS=Homo sapiens GN=PYCR2 PE=1 SV=1	6.49954	2	4	2	320	33.616
P47712	Cytosolic phospholipase A2 OS=Homo sapiens GN=PLA2G4A PE=1 SV=2	6.4962	2	6	2	749	85.184
Q9P2I0	Cleavage and polyadenylation specificity factor subunit 2 OS=Homo sapiens GN=CPSF2 PE=1 SV=2	6.49575	2	6	2	782	88.431
Q6RFH5	WD repeat-containing protein 74 OS=Homo sapiens GN=WDR74 PE=1 SV=1	6.49471	1	4	1	385	42.415
P49821	NADH dehydrogenase [ubiquinone] flavoprotein 1, mitochondrial OS=Homo sapiens GN=NDUFV1 PE=1 SV=4	6.47754	2	4	2	464	50.785
P31260	Homeobox protein Hox-A10 OS=Homo sapiens GN=HOXA10 PE=1 SV=3	6.47362	2	4	2	410	42.388
Q9Y3T9	Nucleolar complex protein 2 homolog OS=Homo sapiens GN=NOC2L PE=1 SV=4	6.4633	3	6	3	749	84.866
Q86UD0	Suppressor APC domain-containing protein 2 OS=Homo sapiens GN=SAPCD2 PE=2 SV=2	6.46055	1	2	1	394	42.61
Q8IV38	Ankyrin repeat and MYND domain-containing protein 2 OS=Homo sapiens GN=ANKMY2 PE=1 SV=1	6.45373	2	8	2	441	49.267
O14641	Segment polarity protein dishevelled homolog DVL-2 OS=Homo sapiens GN=DVL2 PE=1 SV=1	6.44273	2	4	2	736	78.899
P35251	Replication factor C subunit 1 OS=Homo sapiens GN=RFC1 PE=1 SV=4	6.44009	1	2	1	1148	128.175
Q15036	Sorting nexin-17 OS=Homo sapiens GN=SNX17 PE=1 SV=1	6.42746	3	8	3	470	52.868
Q9H2U2-2	Isoform 2 of Inorganic pyrophosphatase 2, mitochondrial OS=Homo sapiens GN=PPA2	6.42073	2	8	2	349	39.613
Q9Y673	Dolichyl-phosphate beta-glucosyltransferase OS=Homo sapiens GN=ALG5 PE=1 SV=1	6.41782	2	4	2	324	36.922
P31946	14-3-3 protein beta/alpha OS=Homo sapiens GN=YWHAB PE=1 SV=3	6.40351	3	8	1	246	28.065
Q9H0P0	Cytosolic 5'-nucleotidase 3A OS=Homo sapiens GN=NT5C3A PE=1 SV=3	6.39565	2	8	2	336	37.924
P13995	Bifunctional methylenetetrahydrofolate dehydrogenase/cyclohydrolase, mitochondrial OS=Homo sapiens GN=MTHFD2 PE=1 SV=2	6.38227	2	6	2	350	37.871
A1YG32	Sodium-coupled neutral amino acid transporter 2 OS=Pan paniscus GN=SLC38A2 PE=3 SV=1	6.3709	1	2	1	506	56.017
P51956	Serine/threonine-protein kinase Nek3 OS=Homo sapiens GN=NEK3 PE=1 SV=2	6.36866	1	6	1	506	57.668
O00159	Unconventional myosin-Ic OS=Homo sapiens GN=MYO1C PE=1 SV=4	6.36061	2	4	2	1063	121.606
P19525	Interferon-induced, double-stranded RNA-activated protein kinase OS=Homo sapiens GN=EIF2AK2 PE=1 SV=2	6.35823	2	4	2	551	62.056
Q8IU85	Calcium/calmodulin-dependent protein kinase type 1D OS=Homo sapiens GN=CAMK1D PE=1 SV=1	6.34989	2	8	2	385	42.887
A4D1P6	WD repeat-containing protein 91 OS=Homo sapiens GN=WDR91 PE=1 SV=2	6.34923	2	4	2	747	83.292
Q96RQ3	Methylcrotonoyl-CoA carboxylase subunit alpha, mitochondrial OS=Homo sapiens GN=MCCC1 PE=1 SV=3	6.34264	2	4	2	725	80.422
Q9NWS0	PIH1 domain-containing protein 1 OS=Homo sapiens GN=PIH1D1 PE=1 SV=1	6.33534	2	8	2	290	32.342
Q9BRR6	ADP-dependent glucokinase OS=Homo sapiens GN=ADPGK PE=1 SV=1	6.33489	1	6	1	497	54.055
P23229	Integrin alpha-6 OS=Homo sapiens GN=ITGA6 PE=1 SV=5	6.33133	1	2	1	1130	126.526
P52888	Thimet oligopeptidase OS=Homo sapiens GN=THOP1 PE=1 SV=2	6.3183	3	6	3	689	78.789
Q9UBD5-2	Isoform 2 of Origin recognition complex subunit 3 OS=Homo sapiens GN=ORC3	6.31643	2	4	2	712	82.272
P0DN76	Splicing factor U2AF 35 kDa subunit-like protein OS=Homo sapiens GN=U2AF1L5 PE=3 SV=1	6.31599	2	4	2	240	27.854
P55265-4	Isoform 4 of Double-stranded RNA-specific adenosine deaminase OS=Homo sapiens GN=ADAR	6.30442	2	4	2	1269	140.749
Q15154	Pericentriolar material 1 protein OS=Homo sapiens GN=PCM1 PE=1 SV=4	6.29875	2	4	2	2024	228.392
P08648	Integrin alpha-5 OS=Homo sapiens GN=ITGA5 PE=1 SV=2	6.28241	1	2	1	1049	114.465
Q9UBG3	Cornulin OS=Homo sapiens GN=CRNN PE=1 SV=1	6.27073	2	8	2	495	53.502
P45880-1	Isoform 1 of Voltage-dependent anion-selective channel protein 2 OS=Homo sapiens GN=VDAC2	6.26646	2	8	2	309	33.351
Q8N1B4	Vacuolar protein sorting-associated protein 52 homolog OS=Homo sapiens GN=VPS52 PE=1 SV=1	6.26376	2	4	2	723	82.17
Q96TA1	Niban-like protein 1 OS=Homo sapiens GN=FAM129B PE=1 SV=3	6.25276	2	4	2	746	84.085
Q9NR12	PDZ and LIM domain protein 7 OS=Homo sapiens GN=PDLIM7 PE=1 SV=1	6.23478	2	4	2	457	49.813
Q96C86	m7GpppX diphosphatase OS=Homo sapiens GN=DCPS PE=1 SV=2	6.23062	1	4	1	337	38.585
P00698	Lysozyme C OS=Gallus gallus GN=LYZ PE=1 SV=1	6.22352	1	14	1	147	16.228
P35869	Aryl hydrocarbon receptor OS=Homo sapiens GN=AHR PE=1 SV=2	6.22144	2	4	2	848	96.086
A7H019	ATP synthase subunit alpha OS=Campylobacter curvus (strain 525.92) GN=atpA PE=3 SV=1	6.21614	3	15	1	505	54.919
P30519	Heme oxygenase 2 OS=Homo sapiens GN=HMOX2 PE=1 SV=2	6.20571	3	6	3	316	36.01
O94887	FERM, RhoGEF and pleckstrin domain-containing protein 2 OS=Homo sapiens GN=FARP2 PE=1 SV=3	6.19557	2	4	2	1054	119.813
Q96BP3	Peptidylprolyl isomerase domain and WD repeat-containing protein 1 OS=Homo sapiens GN=PPWD1 PE=1 SV=1	6.19423	2	4	2	646	73.528
Q00796	Sorbitol dehydrogenase OS=Homo sapiens GN=SORD PE=1 SV=4	6.19189	3	10	3	357	38.3
Q9BZK3	Putative nascent polypeptide-associated complex subunit alpha-like protein OS=Homo sapiens GN=NACAP1 PE=5 SV=1	6.18977	1	16	1	213	23.292
P46108	Adapter molecule crk OS=Homo sapiens GN=CRK PE=1 SV=2	6.17698	1	4	1	304	33.81
Q9GZL7	Ribosome biogenesis protein WDR12 OS=Homo sapiens GN=WDR12 PE=1 SV=2	6.17625	3	10	3	423	47.678
P53004	Biliverdin reductase A OS=Homo sapiens GN=BLVRA PE=1 SV=2	6.17363	2	6	2	296	33.407
Q9BXS5-2	Isoform 2 of AP-1 complex subunit mu-1 OS=Homo sapiens GN=AP1M1	6.17166	4	12	4	435	49.809
P82673	28S ribosomal protein S35, mitochondrial OS=Homo sapiens GN=MRPS35 PE=1 SV=1	6.16693	2	4	2	323	36.821
Q6UVJ0	Spindle assembly abnormal protein 6 homolog OS=Homo sapiens GN=SASS6 PE=1 SV=1	6.16575	2	4	2	657	74.351
Q86WB0	Nuclear-interacting partner of ALK OS=Homo sapiens GN=ZC3HC1 PE=1 SV=1	6.16561	2	4	2	502	55.226
P08397	Porphobilinogen deaminase OS=Homo sapiens GN=HMBS PE=1 SV=2	6.1633	3	6	3	361	39.306
P21980	Protein-glutamine gamma-glutamyltransferase 2 OS=Homo sapiens GN=TGM2 PE=1 SV=2	6.16308	2	4	2	687	77.28
O00461	Golgi integral membrane protein 4 OS=Homo sapiens GN=GOLIM4 PE=1 SV=1	6.15066	2	4	2	696	81.831
P48454-3	Isoform 3 of Serine/threonine-protein phosphatase 2B catalytic subunit gamma isoform OS=Homo sapiens GN=PPP3CC	6.14953	3	6	2	521	59.224
Q9UQB8	Brain-specific angiogenesis inhibitor 1-associated protein 2 OS=Homo sapiens GN=BAIAP2 PE=1 SV=1	6.14743	2	6	2	552	60.83
Q9HBM0	Vezatin OS=Homo sapiens GN=VEZT PE=1 SV=3	6.14053	2	4	2	779	88.609
O75648	Mitochondrial tRNA-specific 2-thiouridylase 1 OS=Homo sapiens GN=TRMU PE=1 SV=2	6.13755	2	8	2	421	47.714
Q96SY0	von Willebrand factor A domain-containing protein 9 OS=Homo sapiens GN=VWA9 PE=1 SV=2	6.11964	1	2	1	518	57.434
Q9H0H5	Rac GTPase-activating protein 1 OS=Homo sapiens GN=RACGAP1 PE=1 SV=1	6.11475	1	2	1	632	70.982
Q13049	E3 ubiquitin-protein ligase TRIM32 OS=Homo sapiens GN=TRIM32 PE=1 SV=2	6.1104	2	4	2	653	71.942
Q8TF05	Serine/threonine-protein phosphatase 4 regulatory subunit 1 OS=Homo sapiens GN=PPP4R1 PE=1 SV=1	6.10725	3	6	3	950	106.936
Q96R06	Sperm-associated antigen 5 OS=Homo sapiens GN=SPAG5 PE=1 SV=2	6.10419	1	2	1	1193	134.338
Q9UGV2	Protein NDRG3 OS=Homo sapiens GN=NDRG3 PE=1 SV=2	6.10133	1	2	1	375	41.382
Q9NVN8	Guanine nucleotide-binding protein-like 3-like protein OS=Homo sapiens GN=GNL3L PE=1 SV=1	6.09624	2	8	2	582	65.532
Q53HC9	Protein TSSC1 OS=Homo sapiens GN=TSSC1 PE=1 SV=2	6.09342	2	8	2	387	43.576
P29597	Non-receptor tyrosine-protein kinase TYK2 OS=Homo sapiens GN=TYK2 PE=1 SV=3	6.09117	4	8	4	1187	133.565
P08235-3	Isoform 3 of Mineralocorticoid receptor OS=Homo sapiens GN=NR3C2	6.07973	2	6	2	988	107.504
Q9NUL3	Double-stranded RNA-binding protein Staufen homolog 2 OS=Homo sapiens GN=STAU2 PE=1 SV=1	6.06863	4	13	2	570	62.601
Q92804	TATA-binding protein-associated factor 2N OS=Homo sapiens GN=TAF15 PE=1 SV=1	6.05396	2	6	2	592	61.793
O75367	Core histone macro-H2A.1 OS=Homo sapiens GN=H2AFY PE=1 SV=4	6.04296	2	4	2	372	39.592
Q5T8D3	Acyl-CoA-binding domain-containing protein 5 OS=Homo sapiens GN=ACBD5 PE=1 SV=1	6.0362	2	4	2	534	60.054
Q9BVG9	Phosphatidylserine synthase 2 OS=Homo sapiens GN=PTDSS2 PE=1 SV=1	6.0347	1	6	1	487	56.216
Q5JRA6	Melanoma inhibitory activity protein 3 OS=Homo sapiens GN=MIA3 PE=1 SV=1	6.03372	1	2	1	1907	213.57
Q06546	GA-binding protein alpha chain OS=Homo sapiens GN=GABPA PE=1 SV=1	6.0335	2	4	2	454	51.263
P31151	Protein S100-A7 OS=Homo sapiens GN=S100A7 PE=1 SV=4	6.0212	2	14	2	101	11.464
Q9H0S4	Probable ATP-dependent RNA helicase DDX47 OS=Homo sapiens GN=DDX47 PE=1 SV=1	6.01249	3	6	3	455	50.615
Q8NFH3	Nucleoporin Nup43 OS=Homo sapiens GN=NUP43 PE=1 SV=1	6.01066	2	6	2	380	42.124
P36551	Oxygen-dependent coproporphyrinogen-III oxidase, mitochondrial OS=Homo sapiens GN=CPOX PE=1 SV=3	6.00953	3	6	3	454	50.12
Q9NVH1	DnaJ homolog subfamily C member 11 OS=Homo sapiens GN=DNAJC11 PE=1 SV=2	5.98534	3	6	3	559	63.239
Q16659	Mitogen-activated protein kinase 6 OS=Homo sapiens GN=MAPK6 PE=1 SV=1	5.97896	2	4	2	721	82.629
Q9Y2W1	Thyroid hormone receptor-associated protein 3 OS=Homo sapiens GN=THRAP3 PE=1 SV=2	5.97448	2	4	2	955	108.601
O60216	Double-strand-break repair protein rad21 homolog OS=Homo sapiens GN=RAD21 PE=1 SV=2	5.96992	2	4	2	631	71.645
Q9Y4W2	Ribosomal biogenesis protein LAS1L OS=Homo sapiens GN=LAS1L PE=1 SV=2	5.96733	2	4	2	734	83.013
P50579	Methionine aminopeptidase 2 OS=Homo sapiens GN=METAP2 PE=1 SV=1	5.96379	2	6	2	478	52.858
Q86V85	Integral membrane protein GPR180 OS=Homo sapiens GN=GPR180 PE=2 SV=1	5.93876	2	8	2	440	49.363
Q13835	Plakophilin-1 OS=Homo sapiens GN=PKP1 PE=1 SV=2	5.93775	2	4	2	747	82.808
Q0P651	Protein ABHD18 OS=Homo sapiens GN=ABHD18 PE=2 SV=1	5.91471	1	6	1	414	46.924
P52564	Dual specificity mitogen-activated protein kinase kinase 6 OS=Homo sapiens GN=MAP2K6 PE=1 SV=1	5.89952	3	6	2	334	37.468
Q9BV44	THUMP domain-containing protein 3 OS=Homo sapiens GN=THUMPD3 PE=1 SV=1	5.89364	2	4	2	507	56.967
Q86WJ1	Chromodomain-helicase-DNA-binding protein 1-like OS=Homo sapiens GN=CHD1L PE=1 SV=2	5.88505	2	4	2	897	100.921
Q92917	G patch domain and KOW motifs-containing protein OS=Homo sapiens GN=GPKOW PE=1 SV=2	5.88084	2	6	2	476	52.197
Q99816	Tumor susceptibility gene 101 protein OS=Homo sapiens GN=TSG101 PE=1 SV=2	5.86278	2	8	2	390	43.916
P55199	RNA polymerase II elongation factor ELL OS=Homo sapiens GN=ELL PE=1 SV=1	5.86212	2	4	2	621	68.223
Q13190	Syntaxin-5 OS=Homo sapiens GN=STX5 PE=1 SV=2	5.86137	2	6	2	355	39.648
Q9Y3B9	RRP15-like protein OS=Homo sapiens GN=RRP15 PE=1 SV=2	5.85587	1	6	1	282	31.465
Q9NVP1	ATP-dependent RNA helicase DDX18 OS=Homo sapiens GN=DDX18 PE=1 SV=2	5.85009	3	6	3	670	75.359
Q86YP4-3	Isoform 3 of Transcriptional repressor p66-alpha OS=Homo sapiens GN=GATAD2A	5.84961	2	4	1	634	68.092
Q15654	Thyroid receptor-interacting protein 6 OS=Homo sapiens GN=TRIP6 PE=1 SV=3	5.83656	2	6	2	476	50.255
Q9UI36	Dachshund homolog 1 OS=Homo sapiens GN=DACH1 PE=1 SV=3	5.83544	2	8	2	760	78.627
Q7YR26	DNA topoisomerase 1 OS=Chlorocebus aethiops GN=TOP1 PE=2 SV=1	5.83383	2	4	2	767	90.897
P52948	Nuclear pore complex protein Nup98-Nup96 OS=Homo sapiens GN=NUP98 PE=1 SV=4	5.83202	2	4	2	1817	197.457
Q3UJK4	GTP-binding protein 2 OS=Mus musculus GN=Gtpbp2 PE=1 SV=1	5.83074	2	4	2	602	65.713
Q9HA92	Radical S-adenosyl methionine domain-containing protein 1, mitochondrial OS=Homo sapiens GN=RSAD1 PE=2 SV=2	5.8166	2	4	2	442	48.683
Q8NDF8-5	Isoform 5 of Non-canonical poly(A) RNA polymerase PAPD5 OS=Homo sapiens GN=PAPD5	5.81559	1	2	1	698	75.754
O75925-2	Isoform 2 of E3 SUMO-protein ligase PIAS1 OS=Homo sapiens GN=PIAS1	5.80911	1	2	1	653	72.157
P06396	Gelsolin OS=Homo sapiens GN=GSN PE=1 SV=1	5.80717	2	4	2	782	85.644
Q9GZT9	Egl nine homolog 1 OS=Homo sapiens GN=EGLN1 PE=1 SV=1	5.80439	2	10	2	426	45.992
P02788	Lactotransferrin OS=Homo sapiens GN=LTF PE=1 SV=6	5.80195	2	4	2	710	78.132
Q96BU1	S100P-binding protein OS=Homo sapiens GN=S100PBP PE=1 SV=1	5.80131	2	4	2	408	45.554
Q86XP3	ATP-dependent RNA helicase DDX42 OS=Homo sapiens GN=DDX42 PE=1 SV=1	5.79957	3	6	3	938	102.912
Q9NQG5	Regulation of nuclear pre-mRNA domain-containing protein 1B OS=Homo sapiens GN=RPRD1B PE=1 SV=1	5.79888	1	2	1	326	36.877
O00151	PDZ and LIM domain protein 1 OS=Homo sapiens GN=PDLIM1 PE=1 SV=4	5.7917	3	10	3	329	36.049
P30740	Leukocyte elastase inhibitor OS=Homo sapiens GN=SERPINB1 PE=1 SV=1	5.7565	2	4	2	379	42.715
Q8N0Z6	Tetratricopeptide repeat protein 5 OS=Homo sapiens GN=TTC5 PE=1 SV=2	5.74836	1	4	1	440	48.897
P18124	60S ribosomal protein L7 OS=Homo sapiens GN=RPL7 PE=1 SV=1	5.73631	2	8	2	248	29.207
Q15120-2	Isoform 2 of [Pyruvate dehydrogenase (acetyl-transferring)] kinase isozyme 3, mitochondrial OS=Homo sapiens GN=PDK3	5.73521	2	6	2	415	48.013
Q8TBC4	NEDD8-activating enzyme E1 catalytic subunit OS=Homo sapiens GN=UBA3 PE=1 SV=2	5.73147	2	8	2	463	51.819
Q2M3G4	Protein Shroom1 OS=Homo sapiens GN=SHROOM1 PE=1 SV=1	5.72839	1	2	1	852	90.73
Q13619	Cullin-4A OS=Homo sapiens GN=CUL4A PE=1 SV=3	5.71959	3	12	1	759	87.624
Q9BTT6	Leucine-rich repeat-containing protein 1 OS=Homo sapiens GN=LRRC1 PE=1 SV=1	5.71806	2	4	2	524	59.205
Q16875-4	Isoform 4 of 6-phosphofructo-2-kinase/fructose-2,6-bisphosphatase 3 OS=Homo sapiens GN=PFKFB3	5.70217	2	8	2	534	60.564
Q13042	Cell division cycle protein 16 homolog OS=Homo sapiens GN=CDC16 PE=1 SV=2	5.69088	2	4	2	620	71.609
Q96SI9	Spermatid perinuclear RNA-binding protein OS=Homo sapiens GN=STRBP PE=1 SV=1	5.68927	3	6	1	672	73.606
Q15833-3	Isoform 3 of Syntaxin-binding protein 2 OS=Homo sapiens GN=STXBP2	5.68207	3	6	3	604	67.652
Q9NS86	LanC-like protein 2 OS=Homo sapiens GN=LANCL2 PE=1 SV=1	5.67094	2	4	2	450	50.821
Q16186	Proteasomal ubiquitin receptor ADRM1 OS=Homo sapiens GN=ADRM1 PE=1 SV=2	5.66972	2	10	2	407	42.127
Q9NPF5	DNA methyltransferase 1-associated protein 1 OS=Homo sapiens GN=DMAP1 PE=1 SV=1	5.66577	2	5	2	467	52.96
Q9BV38	WD repeat-containing protein 18 OS=Homo sapiens GN=WDR18 PE=1 SV=2	5.66385	2	8	2	432	47.375
Q8NE62	Choline dehydrogenase, mitochondrial OS=Homo sapiens GN=CHDH PE=1 SV=2	5.66246	3	10	3	594	65.317
O75342	Arachidonate 12-lipoxygenase, 12R-type OS=Homo sapiens GN=ALOX12B PE=1 SV=1	5.64664	2	6	2	701	80.304
P31944	Caspase-14 OS=Homo sapiens GN=CASP14 PE=1 SV=2	5.6282	2	11	2	242	27.662
Q8IX18	Probable ATP-dependent RNA helicase DHX40 OS=Homo sapiens GN=DHX40 PE=1 SV=2	5.62595	2	7	2	779	88.504
Q96KR1	Zinc finger RNA-binding protein OS=Homo sapiens GN=ZFR PE=1 SV=2	5.62033	1	2	1	1074	116.939
Q15428	Splicing factor 3A subunit 2 OS=Homo sapiens GN=SF3A2 PE=1 SV=2	5.61943	1	6	1	464	49.224
Q9H0M0	NEDD4-like E3 ubiquitin-protein ligase WWP1 OS=Homo sapiens GN=WWP1 PE=1 SV=1	5.61409	2	4	1	922	105.136
P62068	Ubiquitin carboxyl-terminal hydrolase 46 OS=Homo sapiens GN=USP46 PE=1 SV=1	5.607	2	4	2	366	42.415
Q9BU76	Multiple myeloma tumor-associated protein 2 OS=Homo sapiens GN=MMTAG2 PE=1 SV=1	5.59117	2	4	2	263	29.394
Q8IYB8	ATP-dependent RNA helicase SUPV3L1, mitochondrial OS=Homo sapiens GN=SUPV3L1 PE=1 SV=1	5.58791	2	4	2	786	87.935
Q86Y56	Dynein assembly factor 5, axonemal OS=Homo sapiens GN=DNAAF5 PE=1 SV=4	5.5799	3	7	3	855	93.462
Q92613	Protein Jade-3 OS=Homo sapiens GN=JADE3 PE=1 SV=1	5.56469	2	4	2	823	93.748
Q92597	Protein NDRG1 OS=Homo sapiens GN=NDRG1 PE=1 SV=1	5.55864	2	4	2	394	42.808
O60870	DNA/RNA-binding protein KIN17 OS=Homo sapiens GN=KIN PE=1 SV=2	5.55836	2	4	2	393	45.345
Q9NP73	Putative bifunctional UDP-N-acetylglucosamine transferase and deubiquitinase ALG13 OS=Homo sapiens GN=ALG13 PE=1 SV=2	5.55568	2	6	2	1137	125.975
P21127	Cyclin-dependent kinase 11B OS=Homo sapiens GN=CDK11B PE=1 SV=3	5.55176	3	6	3	795	92.65
Q96F45	Zinc finger protein 503 OS=Homo sapiens GN=ZNF503 PE=1 SV=1	5.53066	2	5	2	646	62.516
Q9NXR7-1	Isoform 1 of BRCA1-A complex subunit BRE OS=Homo sapiens GN=BRE	5.53024	2	4	2	415	46.944
Q9Y5M8	Signal recognition particle receptor subunit beta OS=Homo sapiens GN=SRPRB PE=1 SV=3	5.51899	1	2	1	271	29.684
P49005	DNA polymerase delta subunit 2 OS=Homo sapiens GN=POLD2 PE=1 SV=1	5.51556	1	4	1	469	51.257
Q96JH7	Deubiquitinating protein VCIP135 OS=Homo sapiens GN=VCPIP1 PE=1 SV=2	5.51503	2	5	2	1222	134.236
Q69YN2	CWF19-like protein 1 OS=Homo sapiens GN=CWF19L1 PE=1 SV=2	5.5005	2	6	2	538	60.581
Q9C0C9	(E3-independent) E2 ubiquitin-conjugating enzyme OS=Homo sapiens GN=UBE2O PE=1 SV=3	5.49387	2	4	2	1292	141.205
Q6NWK2	AP-2 complex subunit mu-A OS=Danio rerio GN=ap2m1a PE=2 SV=1	5.47631	4	8	4	436	49.628
Q13356	Peptidyl-prolyl cis-trans isomerase-like 2 OS=Homo sapiens GN=PPIL2 PE=1 SV=1	5.47052	3	6	3	520	58.787
Q96J84-2	Isoform 2 of Kin of IRRE-like protein 1 OS=Homo sapiens GN=KIRREL	5.46865	1	2	1	773	84.997
Q9EQQ9-3	Isoform 3 of Protein O-GlcNAcase OS=Mus musculus GN=Mgea5	5.4595	2	4	2	954	107.326
Q96DI7-2	Isoform 2 of U5 small nuclear ribonucleoprotein 40 kDa protein OS=Homo sapiens GN=SNRNP40	5.42771	1	2	1	409	44.488
Q9P2N7-5	Isoform 5 of Kelch-like protein 13 OS=Homo sapiens GN=KLHL13	5.42573	2	4	2	658	74.581
Q9NR45	Sialic acid synthase OS=Homo sapiens GN=NANS PE=1 SV=2	5.42216	1	6	1	359	40.281
P82933	28S ribosomal protein S9, mitochondrial OS=Homo sapiens GN=MRPS9 PE=1 SV=2	5.41919	1	4	1	396	45.806
Q96JG6	Syndetin OS=Homo sapiens GN=VPS50 PE=1 SV=3	5.41728	2	6	2	964	111.104
Q8NHP6	Motile sperm domain-containing protein 2 OS=Homo sapiens GN=MOSPD2 PE=1 SV=1	5.40023	1	4	1	518	59.708
Q9H1E5	Thioredoxin-related transmembrane protein 4 OS=Homo sapiens GN=TMX4 PE=1 SV=1	5.39839	2	6	2	349	38.928
Q9C0B1	Alpha-ketoglutarate-dependent dioxygenase FTO OS=Homo sapiens GN=FTO PE=1 SV=3	5.38846	2	4	2	505	58.245
Q9Y4X5	E3 ubiquitin-protein ligase ARIH1 OS=Homo sapiens GN=ARIH1 PE=1 SV=2	5.38677	2	4	2	557	64.076
Q9P2Y5	UV radiation resistance-associated gene protein OS=Homo sapiens GN=UVRAG PE=1 SV=1	5.3866	2	4	2	699	78.102
Q02952	A-kinase anchor protein 12 OS=Homo sapiens GN=AKAP12 PE=1 SV=4	5.38363	1	2	1	1782	191.367
O75717	WD repeat and HMG-box DNA-binding protein 1 OS=Homo sapiens GN=WDHD1 PE=1 SV=1	5.38036	2	4	2	1129	125.888
P25686	DnaJ homolog subfamily B member 2 OS=Homo sapiens GN=DNAJB2 PE=1 SV=3	5.37705	2	6	1	324	35.558
P11171	Protein 4.1 OS=Homo sapiens GN=EPB41 PE=1 SV=4	5.37155	2	4	2	864	96.957
Q5W0V3	Protein FAM160B1 OS=Homo sapiens GN=FAM160B1 PE=1 SV=1	5.35689	2	6	2	765	86.503
P35613	Basigin OS=Homo sapiens GN=BSG PE=1 SV=2	5.3558	2	14	2	385	42.174
O60524	Nuclear export mediator factor NEMF OS=Homo sapiens GN=NEMF PE=1 SV=4	5.34546	2	4	2	1076	122.878
Q8IV48	3'-5' exoribonuclease 1 OS=Homo sapiens GN=ERI1 PE=1 SV=3	5.33942	1	4	1	349	40.038
Q96MW5	Conserved oligomeric Golgi complex subunit 8 OS=Homo sapiens GN=COG8 PE=1 SV=2	5.33802	3	6	3	612	68.38
Q9H9A5-6	Isoform 6 of CCR4-NOT transcription complex subunit 10 OS=Homo sapiens GN=CNOT10	5.32325	2	4	2	804	89.084
Q92947	Glutaryl-CoA dehydrogenase, mitochondrial OS=Homo sapiens GN=GCDH PE=1 SV=1	5.32101	2	4	2	438	48.096
P41252	Isoleucine--tRNA ligase, cytoplasmic OS=Homo sapiens GN=IARS PE=1 SV=2	5.31468	2	4	2	1262	144.406
Q9NVD7	Alpha-parvin OS=Homo sapiens GN=PARVA PE=1 SV=1	5.31136	2	4	2	372	42.217
Q6PGQ7	Protein aurora borealis OS=Homo sapiens GN=BORA PE=1 SV=2	5.3091	1	2	1	559	61.164
Q9NXN4	Ganglioside-induced differentiation-associated protein 2 OS=Homo sapiens GN=GDAP2 PE=1 SV=1	5.30389	2	8	2	497	56.189
Q9BZE9-2	Isoform 2 of Tether containing UBX domain for GLUT4 OS=Homo sapiens GN=ASPSCR1	5.30004	2	6	2	647	69.947
O60547	GDP-mannose 4,6 dehydratase OS=Homo sapiens GN=GMDS PE=1 SV=1	5.28374	2	4	2	372	41.923
Q9Y394	Dehydrogenase/reductase SDR family member 7 OS=Homo sapiens GN=DHRS7 PE=1 SV=1	5.28034	2	6	2	339	38.274
P51957	Serine/threonine-protein kinase Nek4 OS=Homo sapiens GN=NEK4 PE=1 SV=2	5.27959	2	4	2	841	94.538
Q9NWY4	UPF0609 protein C4orf27 OS=Homo sapiens GN=C4orf27 PE=1 SV=2	5.27302	2	6	2	346	39.411
Q12972	Nuclear inhibitor of protein phosphatase 1 OS=Homo sapiens GN=PPP1R8 PE=1 SV=2	5.27257	2	4	2	351	38.455
Q8NEM7-3	Isoform 3 of Transcription factor SPT20 homolog OS=Homo sapiens GN=SUPT20H	5.26688	1	4	1	811	87.986
Q8TB36	Ganglioside-induced differentiation-associated protein 1 OS=Homo sapiens GN=GDAP1 PE=1 SV=3	5.26488	1	4	1	358	41.32
O60832	H/ACA ribonucleoprotein complex subunit 4 OS=Homo sapiens GN=DKC1 PE=1 SV=3	5.25964	2	6	2	514	57.638
P14859-6	Isoform 6 of POU domain, class 2, transcription factor 1 OS=Homo sapiens GN=POU2F1	5.25948	1	4	1	766	78.487
Q9Y5X1	Sorting nexin-9 OS=Homo sapiens GN=SNX9 PE=1 SV=1	5.25821	2	4	2	595	66.55
P26373	60S ribosomal protein L13 OS=Homo sapiens GN=RPL13 PE=1 SV=4	5.25281	2	4	2	211	24.247
Q7L3T8	Probable proline--tRNA ligase, mitochondrial OS=Homo sapiens GN=PARS2 PE=1 SV=1	5.25254	1	8	1	475	53.228
O55222	Integrin-linked protein kinase OS=Mus musculus GN=Ilk PE=1 SV=2	5.25044	3	6	3	452	51.34
P78406	mRNA export factor OS=Homo sapiens GN=RAE1 PE=1 SV=1	5.25024	3	8	3	368	40.942
P35232	Prohibitin OS=Homo sapiens GN=PHB PE=1 SV=1	5.24796	2	4	2	272	29.786
Q12907	Vesicular integral-membrane protein VIP36 OS=Homo sapiens GN=LMAN2 PE=1 SV=1	5.22707	2	11	2	356	40.203
Q99747	Gamma-soluble NSF attachment protein OS=Homo sapiens GN=NAPG PE=1 SV=1	5.21719	2	4	2	312	34.724
Q9NVH0	Exonuclease 3'-5' domain-containing protein 2 OS=Homo sapiens GN=EXD2 PE=1 SV=2	5.21397	2	4	2	621	70.308
O95487-3	Isoform 3 of Protein transport protein Sec24B OS=Homo sapiens GN=SEC24B	5.21318	1	2	1	1298	140.333
O00487	26S proteasome non-ATPase regulatory subunit 14 OS=Homo sapiens GN=PSMD14 PE=1 SV=1	5.21239	2	10	2	310	34.555
Q9NVM9	Protein asunder homolog OS=Homo sapiens GN=ASUN PE=1 SV=2	5.20666	2	4	2	706	80.174
Q15637-5	Isoform 5 of Splicing factor 1 OS=Homo sapiens GN=SF1	5.20217	2	6	2	673	71.706
Q8N6R0	Methyltransferase-like protein 13 OS=Homo sapiens GN=METTL13 PE=1 SV=1	5.19418	2	4	2	699	78.718
P29590	Protein PML OS=Homo sapiens GN=PML PE=1 SV=3	5.18937	2	4	2	882	97.489
Q5T160	Probable arginine--tRNA ligase, mitochondrial OS=Homo sapiens GN=RARS2 PE=1 SV=1	5.18397	3	7	3	578	65.464
Q14258	E3 ubiquitin/ISG15 ligase TRIM25 OS=Homo sapiens GN=TRIM25 PE=1 SV=2	5.16656	3	6	3	630	70.928
Q7Z3J2	UPF0505 protein C16orf62 OS=Homo sapiens GN=C16orf62 PE=1 SV=2	5.16307	2	4	2	963	109.492
Q9BYJ9	YTH domain-containing family protein 1 OS=Homo sapiens GN=YTHDF1 PE=1 SV=1	5.16277	2	4	1	559	60.836
Q6PJP8	DNA cross-link repair 1A protein OS=Homo sapiens GN=DCLRE1A PE=1 SV=3	5.16241	1	2	1	1040	116.326
Q9HCY8	Protein S100-A14 OS=Homo sapiens GN=S100A14 PE=1 SV=1	5.15958	1	4	1	104	11.655
Q7Z2K6	Endoplasmic reticulum metallopeptidase 1 OS=Homo sapiens GN=ERMP1 PE=1 SV=2	5.15941	3	6	3	904	100.167
Q8TBZ3-7	Isoform 7 of WD repeat-containing protein 20 OS=Homo sapiens GN=WDR20	5.14703	1	2	1	600	66.479
Q9BQC3	Diphthamide biosynthesis protein 2 OS=Homo sapiens GN=DPH2 PE=1 SV=1	5.13899	2	6	2	489	52.05
P04150-3	Isoform Alpha-2 of Glucocorticoid receptor OS=Homo sapiens GN=NR3C1	5.13567	1	2	1	778	85.761
Q01433	AMP deaminase 2 OS=Homo sapiens GN=AMPD2 PE=1 SV=2	5.13567	2	4	2	879	100.624
Q9H270	Vacuolar protein sorting-associated protein 11 homolog OS=Homo sapiens GN=VPS11 PE=1 SV=1	5.13158	2	4	2	941	107.768
Q15427	Splicing factor 3B subunit 4 OS=Homo sapiens GN=SF3B4 PE=1 SV=1	5.12569	1	4	1	424	44.357
O15067	Phosphoribosylformylglycinamidine synthase OS=Homo sapiens GN=PFAS PE=1 SV=4	5.11515	1	2	1	1338	144.643
Q8N9N2	Activating signal cointegrator 1 complex subunit 1 OS=Homo sapiens GN=ASCC1 PE=1 SV=1	5.11184	3	6	3	400	45.481
Q8WX92	Negative elongation factor B OS=Homo sapiens GN=NELFB PE=1 SV=1	5.10505	2	4	2	580	65.655
Q9H307	Pinin OS=Homo sapiens GN=PNN PE=1 SV=4	5.10233	2	4	2	717	81.565
Q9ULE6	Paladin OS=Homo sapiens GN=PALD1 PE=1 SV=3	5.10096	2	4	2	856	96.693
Q96EX3	WD repeat-containing protein 34 OS=Homo sapiens GN=WDR34 PE=1 SV=2	5.0948	1	2	1	536	57.764
Q5VZE5	N-alpha-acetyltransferase 35, NatC auxiliary subunit OS=Homo sapiens GN=NAA35 PE=1 SV=1	5.0827	2	4	2	725	83.584
O00459	Phosphatidylinositol 3-kinase regulatory subunit beta OS=Homo sapiens GN=PIK3R2 PE=1 SV=2	5.07348	2	8	1	728	81.495
Q9BRP1	Programmed cell death protein 2-like OS=Homo sapiens GN=PDCD2L PE=1 SV=1	5.07001	2	4	2	358	39.391
Q96T21	Selenocysteine insertion sequence-binding protein 2 OS=Homo sapiens GN=SECISBP2 PE=1 SV=2	5.06646	2	4	2	854	95.402
Q9H9J2	39S ribosomal protein L44, mitochondrial OS=Homo sapiens GN=MRPL44 PE=1 SV=1	5.06641	1	2	1	332	37.512
O00541	Pescadillo homolog OS=Homo sapiens GN=PES1 PE=1 SV=1	5.06387	3	6	3	588	67.96
P57078	Receptor-interacting serine/threonine-protein kinase 4 OS=Homo sapiens GN=RIPK4 PE=1 SV=1	5.06173	1	2	1	832	91.553
Q5F1R6-2	Isoform 2 of DnaJ homolog subfamily C member 21 OS=Homo sapiens GN=DNAJC21	5.06008	1	2	1	576	67.099
Q9BYV9	Transcription regulator protein BACH2 OS=Homo sapiens GN=BACH2 PE=1 SV=1	5.05948	2	4	2	841	92.477
Q96GM8	Target of EGR1 protein 1 OS=Homo sapiens GN=TOE1 PE=1 SV=1	5.05748	2	4	2	510	56.512
Q2TBE0	CWF19-like protein 2 OS=Homo sapiens GN=CWF19L2 PE=1 SV=4	5.05468	1	2	1	894	103.722
Q96EI5-2	Isoform 2 of Transcription elongation factor A protein-like 4 OS=Homo sapiens GN=TCEAL4	5.05389	1	3	1	358	40.553
Q00613	Heat shock factor protein 1 OS=Homo sapiens GN=HSF1 PE=1 SV=1	5.04321	1	2	1	529	57.225
Q9Y385	Ubiquitin-conjugating enzyme E2 J1 OS=Homo sapiens GN=UBE2J1 PE=1 SV=2	5.04258	1	2	1	318	35.177
Q13546	Receptor-interacting serine/threonine-protein kinase 1 OS=Homo sapiens GN=RIPK1 PE=1 SV=3	5.03676	2	4	2	671	75.883
O95453	Poly(A)-specific ribonuclease PARN OS=Homo sapiens GN=PARN PE=1 SV=1	5.03325	2	4	2	639	73.405
Q86TI2-2	Isoform 2 of Dipeptidyl peptidase 9 OS=Homo sapiens GN=DPP9	5.03048	2	4	2	892	101.605
Q9Y5T5	Ubiquitin carboxyl-terminal hydrolase 16 OS=Homo sapiens GN=USP16 PE=1 SV=1	5.02942	1	2	1	823	93.511
P25311	Zinc-alpha-2-glycoprotein OS=Homo sapiens GN=AZGP1 PE=1 SV=2	5.0169	2	8	2	298	34.237
Q5VWQ0	Round spermatid basic protein 1 OS=Homo sapiens GN=RSBN1 PE=1 SV=2	5.00524	1	2	1	802	90.015
Q2M389	WASH complex subunit 7 OS=Homo sapiens GN=KIAA1033 PE=1 SV=2	5.00472	1	2	1	1173	136.316
Q92888-4	Isoform 4 of Rho guanine nucleotide exchange factor 1 OS=Homo sapiens GN=ARHGEF1	5.00399	2	4	2	948	105.788
Q9BWE0-4	Isoform 2 of Replication initiator 1 OS=Homo sapiens GN=REPIN1	5.00314	1	2	1	624	69.875
Q9UKF6	Cleavage and polyadenylation specificity factor subunit 3 OS=Homo sapiens GN=CPSF3 PE=1 SV=1	5.00024	2	4	2	684	77.436
O60566-3	Isoform 3 of Mitotic checkpoint serine/threonine-protein kinase BUB1 beta OS=Homo sapiens GN=BUB1B	4.99586	3	6	3	1064	121.31
Q9H0W8	Protein SMG9 OS=Homo sapiens GN=SMG9 PE=1 SV=1	4.98928	1	2	1	520	57.614
Q9UGM6	Tryptophan--tRNA ligase, mitochondrial OS=Homo sapiens GN=WARS2 PE=1 SV=1	4.98447	2	4	2	360	40.121
P51665	26S proteasome non-ATPase regulatory subunit 7 OS=Homo sapiens GN=PSMD7 PE=1 SV=2	4.98202	2	8	2	324	37.002
Q9NYJ8	TGF-beta-activated kinase 1 and MAP3K7-binding protein 2 OS=Homo sapiens GN=TAB2 PE=1 SV=1	4.97675	1	2	1	693	76.447
Q9UJP4	Kelch-like protein 21 OS=Homo sapiens GN=KLHL21 PE=1 SV=4	4.96875	2	4	2	597	66.575
P78540	Arginase-2, mitochondrial OS=Homo sapiens GN=ARG2 PE=1 SV=1	4.96778	1	2	1	354	38.554
Q8N6M0	OTU domain-containing protein 6B OS=Homo sapiens GN=OTUD6B PE=1 SV=1	4.96138	1	2	1	293	33.791
Q9BXR0	Queuine tRNA-ribosyltransferase OS=Homo sapiens GN=QTRT1 PE=1 SV=3	4.95156	1	4	1	403	44.019
Q5R3I4	Tetratricopeptide repeat protein 38 OS=Homo sapiens GN=TTC38 PE=1 SV=1	4.94953	2	4	2	469	52.753
O60264	SWI/SNF-related matrix-associated actin-dependent regulator of chromatin subfamily A member 5 OS=Homo sapiens GN=SMARCA5 PE=1 SV=1	4.94082	1	2	1	1052	121.828
Q2T9J0	Peroxisomal leader peptide-processing protease OS=Homo sapiens GN=TYSND1 PE=1 SV=3	4.93779	1	6	1	566	59.271
P70459	ETS domain-containing transcription factor ERF OS=Mus musculus GN=Erf PE=1 SV=1	4.93554	1	2	1	551	59.014
P07205	Phosphoglycerate kinase 2 OS=Homo sapiens GN=PGK2 PE=1 SV=3	4.93184	2	12	1	417	44.767
Q8N3Y1	F-box/WD repeat-containing protein 8 OS=Homo sapiens GN=FBXW8 PE=1 SV=2	4.93181	1	2	1	598	67.352
Q9H2V7	Protein spinster homolog 1 OS=Homo sapiens GN=SPNS1 PE=1 SV=1	4.92555	1	8	1	528	56.594
P62140	Serine/threonine-protein phosphatase PP1-beta catalytic subunit OS=Homo sapiens GN=PPP1CB PE=1 SV=3	4.92534	2	4	1	327	37.163
P62136-2	Isoform 2 of Serine/threonine-protein phosphatase PP1-alpha catalytic subunit OS=Homo sapiens GN=PPP1CA	4.92534	2	4	1	341	38.606
Q96EQ0	Small glutamine-rich tetratricopeptide repeat-containing protein beta OS=Homo sapiens GN=SGTB PE=1 SV=1	4.92098	2	4	2	304	33.408
Q8WU90	Zinc finger CCCH domain-containing protein 15 OS=Homo sapiens GN=ZC3H15 PE=1 SV=1	4.91917	2	6	2	426	48.573
Q9NQ55-3	Isoform 3 of Suppressor of SWI4 1 homolog OS=Homo sapiens GN=PPAN	4.91709	2	4	2	520	58.163
O43396	Thioredoxin-like protein 1 OS=Homo sapiens GN=TXNL1 PE=1 SV=3	4.91686	1	4	1	289	32.231
Q00577	Transcriptional activator protein Pur-alpha OS=Homo sapiens GN=PURA PE=1 SV=2	4.90941	2	4	2	322	34.889
Q9HDC5	Junctophilin-1 OS=Homo sapiens GN=JPH1 PE=1 SV=2	4.90763	1	2	1	661	71.642
Q12792	Twinfilin-1 OS=Homo sapiens GN=TWF1 PE=1 SV=3	4.90067	3	6	2	350	40.258
Q04917	14-3-3 protein eta OS=Homo sapiens GN=YWHAH PE=1 SV=4	4.89697	3	8	1	246	28.201
Q9Y276	Mitochondrial chaperone BCS1 OS=Homo sapiens GN=BCS1L PE=1 SV=1	4.89179	2	8	2	419	47.504
O95297	Myelin protein zero-like protein 1 OS=Homo sapiens GN=MPZL1 PE=1 SV=1	4.8884	1	4	1	269	29.064
Q9BYT8	Neurolysin, mitochondrial OS=Homo sapiens GN=NLN PE=1 SV=1	4.88644	2	4	2	704	80.6
P78356	Phosphatidylinositol 5-phosphate 4-kinase type-2 beta OS=Homo sapiens GN=PIP4K2B PE=1 SV=1	4.88472	1	2	1	416	47.348
O15321	Transmembrane 9 superfamily member 1 OS=Homo sapiens GN=TM9SF1 PE=2 SV=2	4.88295	2	4	2	606	68.816
P30388	Class I histocompatibility antigen, Gogo-OKO alpha chain OS=Gorilla gorilla gorilla PE=2 SV=1	4.88161	2	4	1	362	40.73
P55210-3	Isoform Alpha' of Caspase-7 OS=Homo sapiens GN=CASP7	4.87063	1	2	1	336	37.79
P01137	Transforming growth factor beta-1 OS=Homo sapiens GN=TGFB1 PE=1 SV=2	4.85574	2	5	2	390	44.313
H2QII6	E3 SUMO-protein ligase RanBP2 OS=Pan troglodytes GN=RANBP2 PE=1 SV=1	4.85201	1	2	1	3224	357.923
O43683	Mitotic checkpoint serine/threonine-protein kinase BUB1 OS=Homo sapiens GN=BUB1 PE=1 SV=1	4.8515	2	4	2	1085	122.297
Q15287	RNA-binding protein with serine-rich domain 1 OS=Homo sapiens GN=RNPS1 PE=1 SV=1	4.84771	1	6	1	305	34.188
Q86U44	N6-adenosine-methyltransferase 70 kDa subunit OS=Homo sapiens GN=METTL3 PE=1 SV=2	4.84665	2	4	2	580	64.433
Q13686	DNA oxidative demethylase ALKBH1 OS=Homo sapiens GN=ALKBH1 PE=1 SV=2	4.83239	1	4	1	389	43.804
Q92558	Wiskott-Aldrich syndrome protein family member 1 OS=Homo sapiens GN=WASF1 PE=1 SV=1	4.82553	2	4	2	559	61.614
O76021	Ribosomal L1 domain-containing protein 1 OS=Homo sapiens GN=RSL1D1 PE=1 SV=3	4.82435	2	4	2	490	54.939
Q86UK7	Zinc finger protein 598 OS=Homo sapiens GN=ZNF598 PE=1 SV=1	4.81582	2	4	2	904	98.575
Q96KP4	Cytosolic non-specific dipeptidase OS=Homo sapiens GN=CNDP2 PE=1 SV=2	4.80947	2	6	2	475	52.845
Q9Y2G8	DnaJ homolog subfamily C member 16 OS=Homo sapiens GN=DNAJC16 PE=2 SV=3	4.80476	2	4	2	782	90.534
Q9UKM9	RNA-binding protein Raly OS=Homo sapiens GN=RALY PE=1 SV=1	4.8011	2	4	2	306	32.444
O95486	Protein transport protein Sec24A OS=Homo sapiens GN=SEC24A PE=1 SV=2	4.79581	3	6	3	1093	119.674
Q96CV9	Optineurin OS=Homo sapiens GN=OPTN PE=1 SV=2	4.7841	1	2	1	577	65.88
Q96CB9	5-methylcytosine rRNA methyltransferase NSUN4 OS=Homo sapiens GN=NSUN4 PE=1 SV=2	4.78199	2	4	2	384	43.061
O15287	Fanconi anemia group G protein OS=Homo sapiens GN=FANCG PE=1 SV=1	4.77778	2	4	2	622	68.511
Q9UFC0	Leucine-rich repeat and WD repeat-containing protein 1 OS=Homo sapiens GN=LRWD1 PE=1 SV=2	4.77599	1	2	1	647	70.816
P50453	Serpin B9 OS=Homo sapiens GN=SERPINB9 PE=1 SV=1	4.77392	1	4	1	376	42.376
Q5VT06	Centrosome-associated protein 350 OS=Homo sapiens GN=CEP350 PE=1 SV=1	4.77134	1	6	1	3117	350.716
O00308	NEDD4-like E3 ubiquitin-protein ligase WWP2 OS=Homo sapiens GN=WWP2 PE=1 SV=2	4.7689	2	4	1	870	98.85
P13726	Tissue factor OS=Homo sapiens GN=F3 PE=1 SV=1	4.75296	1	4	1	295	33.047
Q9UEE9	Craniofacial development protein 1 OS=Homo sapiens GN=CFDP1 PE=1 SV=1	4.75295	2	4	2	299	33.573
Q969Z0	Protein TBRG4 OS=Homo sapiens GN=TBRG4 PE=1 SV=1	4.7488	2	6	2	631	70.693
Q9H7U1-3	Isoform 3 of Serine-rich coiled-coil domain-containing protein 2 OS=Homo sapiens GN=CCSER2	4.74208	1	2	1	1047	116.84
P35611-3	Isoform 3 of Alpha-adducin OS=Homo sapiens GN=ADD1	4.73981	2	4	2	768	84.25
Q9NRX5	Serine incorporator 1 OS=Homo sapiens GN=SERINC1 PE=1 SV=1	4.73212	1	4	1	453	50.461
P43121	Cell surface glycoprotein MUC18 OS=Homo sapiens GN=MCAM PE=1 SV=2	4.72808	2	4	2	646	71.563
P29317	Ephrin type-A receptor 2 OS=Homo sapiens GN=EPHA2 PE=1 SV=2	4.72746	1	4	1	976	108.197
Q96DV4	39S ribosomal protein L38, mitochondrial OS=Homo sapiens GN=MRPL38 PE=1 SV=2	4.71829	2	6	2	380	44.568
Q6PKG0	La-related protein 1 OS=Homo sapiens GN=LARP1 PE=1 SV=2	4.71109	2	4	2	1096	123.434
P52701	DNA mismatch repair protein Msh6 OS=Homo sapiens GN=MSH6 PE=1 SV=2	4.70819	1	2	1	1360	152.689
Q00325	Phosphate carrier protein, mitochondrial OS=Homo sapiens GN=SLC25A3 PE=1 SV=2	4.70644	2	5	2	362	40.069
Q08379	Golgin subfamily A member 2 OS=Homo sapiens GN=GOLGA2 PE=1 SV=3	4.70554	2	4	2	1002	113.017
P22087	rRNA 2'-O-methyltransferase fibrillarin OS=Homo sapiens GN=FBL PE=1 SV=2	4.69813	2	4	2	321	33.763
Q15375	Ephrin type-A receptor 7 OS=Homo sapiens GN=EPHA7 PE=1 SV=3	4.6981	1	2	1	998	112.024
Q6SZW1	Sterile alpha and TIR motif-containing protein 1 OS=Homo sapiens GN=SARM1 PE=1 SV=1	4.68562	2	4	2	724	79.338
Q9NW08	DNA-directed RNA polymerase III subunit RPC2 OS=Homo sapiens GN=POLR3B PE=1 SV=2	4.68436	2	4	2	1133	127.702
Q53T94	TATA box-binding protein-associated factor RNA polymerase I subunit B OS=Homo sapiens GN=TAF1B PE=1 SV=1	4.68194	1	2	1	588	68.788
Q9DEA3	Proliferating cell nuclear antigen OS=Gallus gallus GN=PCNA PE=1 SV=1	4.6811	1	2	1	262	28.869
Q9UNF0	Protein kinase C and casein kinase substrate in neurons protein 2 OS=Homo sapiens GN=PACSIN2 PE=1 SV=2	4.67675	2	4	2	486	55.704
Q6P4A7	Sideroflexin-4 OS=Homo sapiens GN=SFXN4 PE=1 SV=1	4.66296	2	3	2	337	37.974
O43639	Cytoplasmic protein NCK2 OS=Homo sapiens GN=NCK2 PE=1 SV=2	4.66015	1	2	1	380	42.889
P50897	Palmitoyl-protein thioesterase 1 OS=Homo sapiens GN=PPT1 PE=1 SV=1	4.65777	1	2	1	306	34.171
Q9UK23	N-acetylglucosamine-1-phosphodiester alpha-N-acetylglucosaminidase OS=Homo sapiens GN=NAGPA PE=1 SV=2	4.65443	1	2	1	515	56.037
Q9NPH2	Inositol-3-phosphate synthase 1 OS=Homo sapiens GN=ISYNA1 PE=1 SV=1	4.65226	2	4	2	558	61.029
Q5VT52	Regulation of nuclear pre-mRNA domain-containing protein 2 OS=Homo sapiens GN=RPRD2 PE=1 SV=1	4.6484	1	2	1	1461	155.924
Q8WXF1	Paraspeckle component 1 OS=Homo sapiens GN=PSPC1 PE=1 SV=1	4.64758	2	4	2	523	58.706
P42892	Endothelin-converting enzyme 1 OS=Homo sapiens GN=ECE1 PE=1 SV=2	4.64726	2	4	2	770	87.108
Q6P444	Mitochondrial fission regulator 2 OS=Homo sapiens GN=MTFR2 PE=1 SV=2	4.64245	1	2	1	385	43.357
O75467	Zinc finger protein 324A OS=Homo sapiens GN=ZNF324 PE=2 SV=1	4.63131	2	6	2	553	61.066
Q8IZ83	Aldehyde dehydrogenase family 16 member A1 OS=Homo sapiens GN=ALDH16A1 PE=1 SV=2	4.62977	2	4	2	802	85.074
Q86WR7	Proline and serine-rich protein 2 OS=Homo sapiens GN=PROSER2 PE=1 SV=2	4.62463	2	4	2	435	45.774
Q9UNN5	FAS-associated factor 1 OS=Homo sapiens GN=FAF1 PE=1 SV=2	4.62253	2	4	2	650	73.908
O43670-4	Isoform 4 of BUB3-interacting and GLEBS motif-containing protein ZNF207 OS=Homo sapiens GN=ZNF207	4.61101	1	6	1	494	52.659
O75157	TSC22 domain family protein 2 OS=Homo sapiens GN=TSC22D2 PE=1 SV=3	4.60328	1	2	1	780	79.179
Q6ZXV5	Transmembrane and TPR repeat-containing protein 3 OS=Homo sapiens GN=TMTC3 PE=1 SV=2	4.59513	2	4	2	915	103.942
Q96KC8	DnaJ homolog subfamily C member 1 OS=Homo sapiens GN=DNAJC1 PE=1 SV=1	4.59212	2	4	2	554	63.843
Q9Y4P1-2	Isoform 2 of Cysteine protease ATG4B OS=Homo sapiens GN=ATG4B	4.58821	1	8	1	468	52.495
Q9Y672	Dolichyl pyrophosphate Man9GlcNAc2 alpha-1,3-glucosyltransferase OS=Homo sapiens GN=ALG6 PE=1 SV=1	4.58198	2	8	2	507	58.142
Q8N8E3	Centrosomal protein of 112 kDa OS=Homo sapiens GN=CEP112 PE=1 SV=2	4.5817	1	2	1	955	112.679
Q8TAA9	Vang-like protein 1 OS=Homo sapiens GN=VANGL1 PE=1 SV=1	4.5791	2	4	2	524	59.937
Q9H4L5	Oxysterol-binding protein-related protein 3 OS=Homo sapiens GN=OSBPL3 PE=1 SV=1	4.56783	1	4	1	887	101.16
Q6UW02	Cytochrome P450 20A1 OS=Homo sapiens GN=CYP20A1 PE=1 SV=1	4.56744	3	6	3	462	52.399
Q6AI08	HEAT repeat-containing protein 6 OS=Homo sapiens GN=HEATR6 PE=1 SV=1	4.56241	1	2	1	1181	128.699
Q7LG56-6	Isoform 6 of Ribonucleoside-diphosphate reductase subunit M2 B OS=Homo sapiens GN=RRM2B	4.55973	2	4	1	423	48.756
O95273	Cyclin-D1-binding protein 1 OS=Homo sapiens GN=CCNDBP1 PE=1 SV=2	4.55721	1	2	1	360	40.236
Q96GX5	Serine/threonine-protein kinase greatwall OS=Homo sapiens GN=MASTL PE=1 SV=1	4.55659	2	10	1	879	97.257
Q15061	WD repeat-containing protein 43 OS=Homo sapiens GN=WDR43 PE=1 SV=3	4.55114	1	2	1	677	74.843
O00267-2	Isoform 2 of Transcription elongation factor SPT5 OS=Homo sapiens GN=SUPT5H	4.5489	2	4	2	1083	120.424
Q6GQQ9	OTU domain-containing protein 7B OS=Homo sapiens GN=OTUD7B PE=1 SV=1	4.54852	1	2	1	843	92.468
Q9P0J1-2	Isoform 2 of [Pyruvate dehydrogenase [acetyl-transferring]]-phosphatase 1, mitochondrial OS=Homo sapiens GN=PDP1	4.54653	1	2	1	562	63.655
Q14155	Rho guanine nucleotide exchange factor 7 OS=Homo sapiens GN=ARHGEF7 PE=1 SV=2	4.54485	1	2	1	803	89.955
Q9NZ52	ADP-ribosylation factor-binding protein GGA3 OS=Homo sapiens GN=GGA3 PE=1 SV=1	4.53567	2	4	2	723	78.267
Q8WTW3	Conserved oligomeric Golgi complex subunit 1 OS=Homo sapiens GN=COG1 PE=1 SV=1	4.53491	2	4	2	980	108.909
P11908-2	Isoform 2 of Ribose-phosphate pyrophosphokinase 2 OS=Homo sapiens GN=PRPS2	4.52739	1	2	1	321	35.032
Q86UL3	Glycerol-3-phosphate acyltransferase 4 OS=Homo sapiens GN=GPAT4 PE=1 SV=1	4.51553	2	6	2	456	52.037
P07737	Profilin-1 OS=Homo sapiens GN=PFN1 PE=1 SV=2	4.50878	1	2	1	140	15.045
Q5TDH0-3	Isoform 3 of Protein DDI1 homolog 2 OS=Homo sapiens GN=DDI2	4.50004	1	2	1	419	46.542
Q9BPZ7-3	Isoform 3 of Target of rapamycin complex 2 subunit MAPKAP1 OS=Homo sapiens GN=MAPKAP1	4.49984	3	6	3	475	53.71
Q13685	Angio-associated migratory cell protein OS=Homo sapiens GN=AAMP PE=1 SV=2	4.49526	1	4	1	434	46.721
Q15070	Mitochondrial inner membrane protein OXA1L OS=Homo sapiens GN=OXA1L PE=1 SV=3	4.48993	2	6	2	435	48.516
Q9H267	Vacuolar protein sorting-associated protein 33B OS=Homo sapiens GN=VPS33B PE=1 SV=2	4.47958	2	4	2	617	70.54
Q8WTV0	Scavenger receptor class B member 1 OS=Homo sapiens GN=SCARB1 PE=1 SV=1	4.47821	1	2	1	552	60.838
Q5VUA4	Zinc finger protein 318 OS=Homo sapiens GN=ZNF318 PE=1 SV=2	4.46954	1	2	1	2279	250.958
Q13884	Beta-1-syntrophin OS=Homo sapiens GN=SNTB1 PE=1 SV=3	4.46762	2	4	2	538	58.025
O95396	Adenylyltransferase and sulfurtransferase MOCS3 OS=Homo sapiens GN=MOCS3 PE=1 SV=1	4.46231	1	8	1	460	49.638
[truncated: 767 more rows]
