# Supplementary material for: Calcium-stimulated disassembly of focal adhesions mediated by an ORP3/IQSec1 complex
Source: eLife. 2020 Apr 1;9:e54113. doi: 10.7554/eLife.54113 (PMC7159923; doi:10.7554/eLife.54113)
Supplement: Figure 7—source data 1. — Cells expressing either unfused GFP or GFP-ORP3 were treated (or not) with thapsigargin as described in Methods. Samples were immunoprecipitated with anti-GFP antibody, bound lipids were extracted and analyzed by mass spectroscopy. [file elife-54113-fig7-data1.xlsx]

## Sheet: MAG
MAG
	Area(CPS)	Area(CPS)	Area(CPS)
	GFP	ORP3	Thapsigargan			ug Lipid	ug Lipid	ug Lipid
MAG(18:1D7)	2541773481	318146629	244582662			GFP	ORP3	Thapsigargan
MAG(18:0)	1.85488e+07	1.61796e+07	1.12191e+07		MAG(18:0)	0.0145952	0.101712	0.0917406
MAG(18:2)	2.21605e+07	2.16435e+07	1.51778e+07		MAG(18:2)	0.017437	0.13606	0.124112

## Sheet: DAG
DAG
	Area(CPS)	Area(CPS)	Area(CPS)
	GFP	ORP3	Thapsigargan			ug Lipid	ug Lipid	ug Lipid
DAG(15:0_18:1D7)	2.7367e+08	2.94548e+08	2.23437e+08			GFP	ORP3	Thapsigargan
DAG(18:0_18:0)	7.25987e+08	7.5936e+08	5.06192e+08		DAG(18:0_18:0)	26.5278	25.7805	22.6548

## Sheet: TAG
TAG
	Area(CPS)	Area(CPS)	Area(CPS)
	GFP	ORP3	Thapsigargan			ug Lipid	ug Lipid	ug Lipid
TAG(15:0_18:1D7_15:0)	1.33746e+09	9.52036e+08	8.63445e+08			GFP	ORP3	Thapsigargan
TAG(15:0_15:0_20:3)	1.3017e+07	1.3502e+07	1.26974e+07		TAG(15:0_15:0_20:3)	0.535293	0.780024	0.808801
TAG(15:0_16:0_16:0)	1.16674e+07	1.33503e+07	9.46585e+06		TAG(15:0_16:0_16:0)	0.479797	0.771259	0.602959
TAG(15:0_16:0_16:1)	1.45109e+07	1.47838e+07	1.28449e+07		TAG(15:0_16:0_16:1)	0.596727	0.854073	0.818198
TAG(15:0_6:0_16:0)	6.08997e+06	4.70666e+06	3.05263e+06		TAG(15:0_6:0_16:0)	0.250436	0.271908	0.194447
TAG(16:0_14:0_14:0)	1.03417e+07	8.64038e+06	8.14647e+06		TAG(16:0_14:0_14:0)	0.425278	0.499163	0.518916
TAG(16:0_14:0_16:0)	1.34711e+07	1.31442e+07	1.28445e+07		TAG(16:0_14:0_16:0)	0.553967	0.759354	0.818172
TAG(16:0_14:0_16:1)	1.58203e+07	1.74124e+07	1.43685e+07		TAG(16:0_14:0_16:1)	0.650575	1.00593	0.915248
TAG(16:0_16:0_16:0)	1.40161e+07	1.39125e+07	1.15266e+07		TAG(16:0_16:0_16:0)	0.576379	0.80374	0.734223
TAG(16:0_16:0_16:1)	2.13467e+07	2.02509e+07	1.86104e+07		TAG(16:0_16:0_16:1)	0.877837	1.16991	1.18545
TAG(16:0_16:0_18:1)	2.81751e+07	2.36209e+07	1.81176e+07		TAG(16:0_16:0_18:1)	1.15864	1.3646	1.15406
TAG(16:0_16:1_16:1)	1.54843e+07	1.61235e+07	1.49405e+07		TAG(16:0_16:1_16:1)	0.636757	0.931468	0.951685
TAG(16:0_16:1_17:1)	9.20897e+08	7.33492e+08	6.30406e+08		TAG(16:0_16:1_17:1)	37.8698	42.3746	40.1558
TAG(16:0_16:1_18:1)	2.09512e+07	2.005e+07	1.6555e+07		TAG(16:0_16:1_18:1)	0.861569	1.15831	1.05452
TAG(16:0_18:1_18:1)	1.79142e+07	1.71243e+07	1.5693e+07		TAG(16:0_18:1_18:1)	0.736681	0.989287	0.999615
TAG(16:0_18:1_18:3)	2.09481e+07	1.98733e+07	1.94124e+07		TAG(16:0_18:1_18:3)	0.861444	1.1481	1.23654
TAG(16:0_18:1_20:4)	2.13845e+07	1.70439e+07	1.71537e+07		TAG(16:0_18:1_20:4)	0.879389	0.984643	1.09266
TAG(16:1_18:1_18:1)	1.43238e+07	1.13748e+07	9.98467e+06		TAG(16:1_18:1_18:1)	0.589033	0.657134	0.636007
TAG(18:0_16:0_16:0)	7.26374e+06	6.77219e+06	5.60328e+06		TAG(18:0_16:0_16:0)	0.298705	0.391236	0.35692
TAG(18:0_16:0_18:0)	7.50188e+06	7.24997e+06	7.50671e+06		TAG(18:0_16:0_18:0)	0.308498	0.418838	0.478165
TAG(18:0_16:0_18:1)	3.1022e+07	2.53519e+07	2.26268e+07		TAG(18:0_16:0_18:1)	1.27571	1.4646	1.44129
TAG(18:0_16:0_20:4)	2.07789e+07	1.82294e+07	1.74503e+07		TAG(18:0_16:0_20:4)	0.854484	1.05313	1.11156
TAG(18:0_18:0_18:0)	8.35701e+06	6.08749e+06	5.38163e+06		TAG(18:0_18:0_18:0)	0.343663	0.35168	0.342801
TAG(18:0_18:0_18:1)	1.22249e+07	1.19233e+07	1.08462e+07		TAG(18:0_18:0_18:1)	0.502722	0.688819	0.690887
TAG(18:0_18:1_18:1)	8.80874e+06	7.9245e+06	5.70136e+06		TAG(18:0_18:1_18:1)	0.36224	0.457806	0.363168
TAG(18:0_18:1_20:3)	7.48389e+06	7.07992e+06	7.76047e+06		TAG(18:0_18:1_20:3)	0.307758	0.409014	0.494329
TAG(18:0_6:0_15:0)	1.44701e+07	9.78394e+06	5.32704e+06		TAG(18:0_6:0_15:0)	0.59505	0.565228	0.339323
TAG(18:0_6:0_15:0)	4.60737e+06	3.51522e+06	2.08536e+06		TAG(18:0_6:0_15:0)	0.189468	0.203077	0.132834
TAG(18:1_18:1_18:1)	1.55884e+07	1.53378e+07	1.55402e+07		TAG(18:1_18:1_18:1)	0.641038	0.886077	0.989882
TAG(18:1_18:1_18:1)	2.0143e+06	1.40708e+06	1.5346e+06		TAG(18:1_18:1_18:1)	0.0828333	0.0812885	0.0977518
TAG(18:1_18:1_18:2)	1.02045e+07	8.87363e+06	9.65243e+06		TAG(18:1_18:1_18:2)	0.419638	0.512638	0.614844
TAG(18:1_18:1_20:4)	1.5321e+07	1.51284e+07	1.4237e+07		TAG(18:1_18:1_20:4)	0.63004	0.873985	0.906875
TAG(18:4_14:0_16:0)	1.58203e+07	1.74124e+07	1.43685e+07		TAG(18:4_14:0_16:0)	0.650575	1.00593	0.915248
TAG(18:4_16:0_16:0)	2.41196e+07	2.33157e+07	1.96861e+07		TAG(18:4_16:0_16:0)	0.991864	1.34697	1.25397
TAG(44:4)	6.62574e+06	6.74554e+06	5.1746e+06		TAG(44:4)	0.272469	0.389696	0.329614
TAG(44:6e)	2.30288e+07	1.98266e+07	1.33074e+07		TAG(44:6e)	0.947006	1.1454	0.847658

## Sheet: Chol
Chol
	Area(CPS)	Area(CPS)	Area(CPS)
	GFP	ORP3	Thapsigargan			ug Lipid	ug Lipid	ug Lipid
Chol (D7)	8452237122	8692451766	9122467822			GFP	ORP3	Thapsigargan

## Sheet: CE
Chol Ester
	Area(CPS)	Area(CPS)	Area(CPS)
	GFP	ORP3	Thapsigargan			ug Lipid	ug Lipid	ug Lipid
CE (18:1D7)	9.10834e+08	6.47535e+08	8.74777e+08			GFP	ORP3	Thapsigargan

## Sheet: LPC
LPC
	Area(CPS)	Area(CPS)	Area(CPS)
	GFP	ORP3	Thapsigargan			ug Lipid	ug Lipid	ug Lipid
LPC(18:1D7)	1.63388e+09	1.60919e+09	1.6219e+09			GFP	ORP3	Thapsigargan
LPC(26:0)	1.02692e+07	9.97293e+06	1.11018e+07		LPC(26:0)	0.157128	0.154937	0.171124

## Sheet: LPE
LPE
	Area(CPS)	Area(CPS)	Area(CPS)
	GFP	ORP3	Thapsigargan			ug Lipid	ug Lipid	ug Lipid
LPE(18:1D7)	8.34545e+07	8.28071e+07	7.8856e+07			GFP	ORP3	Thapsigargan

## Sheet: SM
SM
	Area(CPS)	Area(CPS)	Area(CPS)
	GFP	ORP3	Thapsigargan			ug Lipid	ug Lipid	ug Lipid
SM(d36:2D9)	1.39174e+09	1.3515e+09	1.43391e+09			GFP	ORP3	Thapsigargan
SM(d36:1)	3.78862e+06	6.31735e+06	1.10861e+07		SM(d36:1)	0.0816663	0.140229	0.231941
SM(d38:2)	3.52326e+07	3.84969e+07	3.4649e+07		SM(d38:2)	0.759463	0.854534	0.72492
SM(d42:3)	3.70557e+07	3.10274e+07	2.05267e+07		SM(d42:3)	0.798761	0.68873	0.429456
SM(d42:3)	4.60607e+06	9.30672e+06	8.83642e+06		SM(d42:3)	0.0992872	0.206586	0.184874
SM(t40:7)	1.07832e+08	1.00332e+08	9.88491e+07		SM(t40:7)	2.32439	2.22711	2.0681

## Sheet: PE
PE
	Area(CPS)	Area(CPS)	Area(CPS)
	GFP	ORP3	Thapsigargan			ug Lipid	ug Lipid	ug Lipid
PE(18:1D7_15:0)	2.16937e+07	1.91871e+07	3.34727e+07			GFP	ORP3	Thapsigargan
PE(16:0_22:6)	1.21367e+06	2.26613e+06	4.85571e+06		PE(16:0_22:6)	0.279729	0.590535	0.725323
PE(16:0_22:6)	1.14077e+06	1.99103e+06	4.86902e+06		PE(16:0_22:6)	0.262926	0.518846	0.727312
PE(16:0p_20:4)	520675	1.69104e+06	3.57731e+06		PE(16:0p_20:4)	0.120006	0.440671	0.534362
PE(16:0p_22:6)	1.72655e+06	4.81405e+06	1.12993e+07		PE(16:0p_22:6)	0.397938	1.2545	1.68783
PE(18:0_20:3)	1.72571e+06	5.8724e+06	9.29346e+06		PE(18:0_20:3)	0.397745	1.5303	1.38821
PE(18:0_20:4)	5.05281e+06	1.06614e+07	1.82511e+07		PE(18:0_20:4)	1.16458	2.77827	2.72626
PE(18:0_20:4)	1.15606e+06	1.85288e+06	3.91604e+06		PE(18:0_20:4)	0.266451	0.482846	0.584959
PE(18:0_22:6)	8.8853e+06	1.76178e+07	3.10308e+07		PE(18:0_22:6)	2.0479	4.59106	4.63523
PE(18:0_22:6)	1.72571e+06	5.8724e+06	9.29346e+06		PE(18:0_22:6)	0.397745	1.5303	1.38821
PE(18:0p_22:6)	4.17184e+06	4.64213e+06	9.33797e+06		PE(18:0p_22:6)	0.961534	1.2097	1.39486
PE(18:1_22:6)	779322	1.99761e+06	3.92768e+06		PE(18:1_22:6)	0.17962	0.52056	0.586698

## Sheet: PS
PS
	Area(CPS)	Area(CPS)	Area(CPS)
	GFP	ORP3	Thapsigargan			ug Lipid	ug Lipid	ug Lipid
PS(18:1D7_15:0)	2.61757e+07	2.57518e+07	2.57465e+07			GFP	ORP3	Thapsigargan
PS(18:0_22:6)	5.50073e+06	1.21008e+07	1.10859e+07		PS(18:0_22:6)	1.05073	2.3495	2.1529

[truncated: 3 more sheets: PG, PI, PA]
